# Supplementary material
Source: MDPI journal article supplement (https://www.mdpi.com/2311-5637/9/3/215)
Supplement: s1 [file s1 › Supplementary Figure S1.pdf]

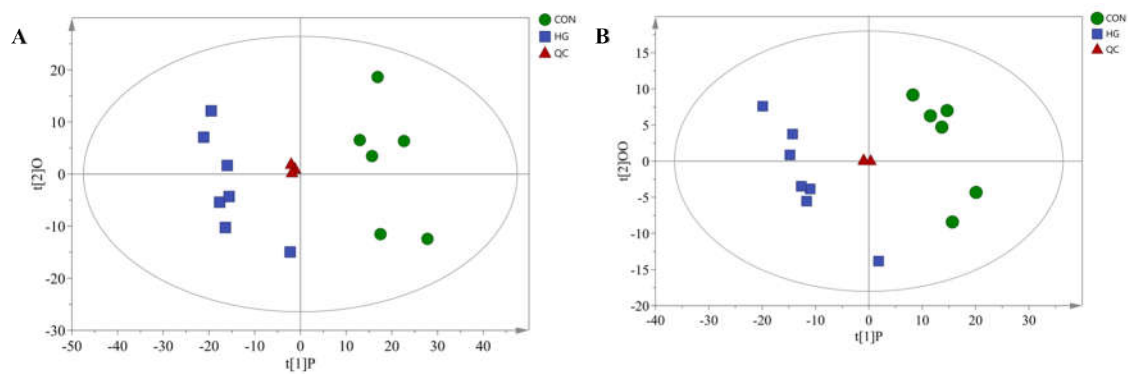

**Figure S1.** Principal component analysis (PCA) score plots of metabolite profile in the CON and HG groups following positive (A) and negative (B).
