# Supplementary material
Source: MDPI journal article supplement (https://www.mdpi.com/2311-5637/9/3/215)
Supplement: s1 [file s1 › Supplementary Table S1.xls]

## Sheet: positively ionized metabolites
ID	MS2 name	type	mzmed	rtmed	HG1	HG2	HG3	HG4	HG5	HG6	HG7	QC01	QC02	QC03	Mean QC	CON1	CON2	CON3	CON4	CON5	CON6	CON7
ID	MS2 name	type	mzmed	rtmed	HG	HG	HG	HG	HG	HG	HG	QC	QC	QC	Mean QC	CON	CON	CON	CON	CON	CON	CON
1	1-Butylamine	forward	74.09691841	660.052	3001525.62	2832358.841	2879113.116	2845171.701	2839915.648	2985338.244	2892790.547	2868255.089	2965435.721	2806421.021	2880037.277	3040260.397	2927733.633	2705327.376	3049344.116	2923057.23	3010226.562	4604966.532
2	Achillicin	forward	307.1515137	316.636	1686207.435	849675.5248	804220.5613	1486275.092	1290929.665	1056011.681	1559203.012	2829511.577	3629075.681	2237918.548	2898835.26866667	3045661.097	2932960.097	3665828.577	1531601.943	4897862.8	2836938.403	1958535.417
3	Moracin K	forward	325.1047589	362.906	511610.2662	935205.4536	252815.7649	333668.7928	NA	165598.9181	359890.6984	2253557.769	2731960.746	3401071.51	2795530.00833333	10063692.47	10570839.03	4350197.041	13491092.29	9924551.867	7904691.611	6256422.225
4	N2-Galacturonyl-L-lysine	forward	323.1458456	329.081	74955.34341	698666.8691	884231.3511	1660705.87	800259.8046	731957.12	996532.9008	4207098.363	4508963.777	3371202.991	4029088.377	11034301.33	111864.6958	6724118.343	6861273.13	7419880.931	7119819.909	6734484.093
5	L-Pipecolic acid	forward	130.0863569	541.402	27408147.2	57786949.42	20162113.53	16169455.32	23541086.36	28231764.96	36232737.32	21227290.41	20439453.78	18378990.95	20015245.0466667	9721471.043	8164458.39	12795737.81	12205019.03	7672443.42	15293496.63	7903628.879
6	L-Carnitine	forward	162.1125212	320.524	15014777.84	4509224.59	6637575.619	6866077.304	NA	9055913.304	6083070.226	7245007.699	7412499.747	7056138.16	7237881.86866667	6724264.49	2492561.745	9017907.347	6677043.524	4953026.74	8559052.273	4835141.154
7	Hypoxanthine	forward	137.0458023	272.8025	1005412.18	229888.187	1721001.059	703703.7869	6267323.374	357256.0977	175301.5766	1080302.723	2639321.582	2651073.757	2123566.02066667	2047961.684	3170760.184	2884555.778	1272113.235	2614390.399	2546517.163	175301.5766
8	Adenine	forward	136.0616601	168.0465	4404287174	2501310069	2325796205	4487083234	4093667009	4636052657	1410561734	3364617820	3422081910	3343817974	3376839234.66667	3179297217	2700232366	2693637796	3327311188	2012723377	2659781950	2867836444
9	8-iso-15-keto-PGE2	forward	351.2142634	275.14	21263310.08	25134388.69	27466666.6	30673271.65	24374009.93	9352686.686	47967041.07	26834095.6	31430668.2	19799123.68	26021295.8266667	56248277.98	27515211.1	25932866.72	27445698.41	43217999.51	31099436.34	37755768.69
10	11-Dehydro-thromboxane B2	forward	369.2249827	219.933	5174355.073	3330499.375	2934436.051	7335624.453	5599970.441	8892943.895	7913387.174	14633844.36	9193869.077	7409518.242	10412410.5596667	23918925.13	18244553.64	7098006.064	14793379.41	19024727.5	11661478.74	12567084.41
11	Piperidine	forward	86.0967842	259.685	23594032.24	17644469.84	18058355.28	21782017.51	24696550.62	16367187.3	22730360.82	18547020.02	18254689.09	17749159.76	18183622.9566667	15111277.91	14557187.67	18806139.17	14814334.58	15828668.84	17817798.08	14109288.61
12	Tocopheronic acid	forward	295.1517595	326.095	8801824.945	14220559.27	14205934.84	25441110.74	14260035.05	11499684.78	19379455.62	28266196.03	31433472.25	22237098.43	27312255.57	55912019.85	16247848.35	25807275.22	27804581.69	38887650.56	32592345.59	39032455.98
13	"3-(2,4-Dihydroxyphenyl)-8,9-dihydro-5-hydroxy-8-(1-methylethenyl)-4H-furo[2,3-h]-1-benzopyran-5-one"	forward	353.0985479	323.63	70627321.55	1023870.297	597449.4879	58002347.79	60810279.87	38013086.27	68935479.13	66526187.61	74747908.96	44524842.48	61932979.6833333	75726359.67	50024176.43	48869557.42	58747121.46	83725376.86	55563524.01	13001026.59
14	2-Hydroxypyridine	forward	96.04463904	47.7009	2053247.019	404051.2061	1524770.167	1843586.656	9424783.609	42525293.62	1641948.984	8660638.645	8105964.106	9324170.088	8696924.27966667	13169968.02	12541050.89	6595101.236	10242992.3	7522206.58	9329887.692	9812958.852
15	Sporotrichiol	forward	367.2092295	180.095	10892923.24	6402342.297	8926331.586	16515888.85	23511949.46	7353906.224	20260788.24	25167371.99	21570289.83	29663522.68	25467061.5	64954402.79	33967000.22	15301052.53	17947719.2	41217202.87	16043599.24	19527110.65
16	2-Pyrrolidinone	forward	86.06045041	38.6399	42433140.74	35286884.11	61525567.65	46432756.32	51798359.81	21832979.72	42336991.38	30458922.77	32042715.39	32526948.65	31676195.6033333	22204029.44	19784092.73	30242215.1	33057405.78	22775905.32	17529859.15	17793607.25
17	Pyrrolidine	forward	72.08123356	276.282	3996646.08	4651045.689	3303184.804	3932932.224	5134027.856	3431390.707	5105150.627	4482430.83	4373259.98	4093024.881	4316238.56366667	3985643.564	4032758.155	4639185.757	3901340.349	4862674.306	4543829.911	4292920.936
18	Creatinine	forward	114.0663775	179.2365	3853395085	156384831.6	52725213.07	579784926.1	118974613.5	1087716932	183242399.5	2541820308	2596771999	2599913518	2579501941.66667	858796595.9	1642968850	4216569092	6459415943	1282747861	5450872547	1373704735
19	Thyrotropin releasing hormone	forward	363.1773383	314.6405	1514699.927	1090749.027	360893.8744	2331679.266	1570506.748	608546.4338	1781493.444	2576440.06	5593079.897	2007265.601	3392261.85266667	4367319.412	2174413.433	4421209.058	7670798.3	2521255.499	3710319.656	3110673.019
20	Gibberellin A97	forward	365.192628	311.4645	4783646.659	3567156.365	3153304.221	3824595.331	6694209.671	3296929.191	4023650.415	11736541.26	14245553.57	7555478.018	11179190.9493333	24648303.65	7370142.68	12095881.88	19037688.08	20014342.64	17204209.01	16351374.91
21	Venoterpine	forward	150.0913487	249.039	2943936.587	68320983.9	45062390.62	8272812.269	5913743.825	15596523.25	2603346.712	2152100.86	2718887.277	2326246.257	2399078.13133333	1211525.816	835822.2499	2281098.215	15979011.48	5181572.378	6804392.896	20298098.57
22	Choline	forward	104.1071727	285.804	1523607285	2156646794	1592054152	1410256171	1902995140	2775803311	1594842080	2209365428	2242223807	2211947986	2221179073.66667	1680972360	827433171.6	2321250776	1676902879	1546316925	1871774812	1468875451
23	Nicotinic acid	forward	124.0393027	235.6085	21741535.83	21322917.69	10220257.94	14280264.93	23687115.39	18560250.48	36744711.09	16993071.6	16797615.56	16107152.8	16632613.32	10604023.15	8635186.542	16844462.46	10773620.81	14607397.78	10013322.54	15213194.6
24	"Quinoline-4,8-diol"	forward	162.0548756	134.7795	6512216.689	3745885.823	3360464.956	6298204.212	4370214.195	4243642.309	8158862.064	14978181.58	13776580.81	14155132.04	14303298.1433333	20588113.46	24536002.59	9713985.945	18410725.17	24301063.79	21717545.61	16724506.28
25	3-Formyl-6-hydroxyindole	forward	162.0549308	76.3107	11170447.92	7974073.237	8857057.936	11556058.7	12438474.66	12234826.73	16277744.37	19141966.1	20853746.21	21207501.35	20401071.22	46132749.72	35338141.67	32679149.68	29301587.73	26038711.65	28581752.29	22037271.76
26	"6,15-Diketo,13,14-dihydro-PGF1a"	forward	369.2243096	327.479	3233186.262	2023406.757	4224923.741	1342953.154	3342480.969	2415135.607	2607954.878	1922719.987	2251723.506	1632206.135	1935549.876	568865.0721	408918.6107	2017073.352	1674795.272	458879.5351	909831.95	592525.6145
27	D-Proline	forward	116.0707115	332.947	123525175.8	1341735041	531199444.4	222540188.9	571673812	650775981.9	204923376	246033971.1	256783353.9	264355990.7	255724438.566667	313469414.3	3766249.08	808826909.2	145863673.3	88077613.44	289653441.2	440472662
28	6-Methyladenine	forward	150.0773675	252.5885	39301132.91	94359547.37	71452780.76	40643605.97	22331273.55	45470358	60852253.79	44025827.6	44524486.55	43710804.4	44087039.5166667	37449947.75	14800621.73	46337523.08	19672357	38032919.68	20347751.5	39581175.46
29	6-Deoxy-gamma-mangostin	forward	381.1665943	312.219	3119315.062	1330978.4	1744756.601	3744599.912	2268195.388	4796569.615	2625525.235	7488569.085	1768662.891	10809000.4	6688744.12533333	4733325.735	16787974.81	3461216.402	9220810.381	3731874.164	4857151.723	3364054.957
30	2-Hydroxyadenine	forward	152.0565902	213.6655	13657081.48	7928870.278	18292387.6	5839826.997	11418255.46	10181993.2	13613000.62	7603755.544	8069514.96	7775541.741	7816270.74833333	5424965.474	4069024.38	7102763.36	2814384.984	4194552.33	4469900.981	6234786.112
31	Cytosine	forward	112.0506952	256.1815	9131165.001	7339127.949	23240641.05	11617094.33	22407214.37	28121400.87	17402143.08	14815220.23	14703501.51	13937482.39	14485401.3766667	8249383.191	15320260	11593239.84	12167550.7	8588309.737	9365654.316	13010187.32
32	D-Maltose	forward	365.1049875	410.0425	22304964.12	4631215.052	6059853.905	3072175.931	4470578.611	40475306.29	5335767.219	7758465.931	6220748.459	11874686.75	8617967.04666667	13353616.73	1036333.367	12422434.53	10687962.26	12497444.66	10817421.07	8185637.149
33	alpha-Bixin	forward	395.2187194	240.418	928116.2241	463915.3414	255674.4818	1662984.703	707419.8542	203616.6978	2728039.905	2053358.919	1015251.552	3413485.701	2160698.724	1424445.076	3404067.76	750894.1082	2779405.862	1847962.626	1681643.892	1589267.291
34	Quinoline	forward	130.0651993	212.5025	16918257.81	10378688.66	1216195.792	5912531.437	10228775.23	7945245.021	7971960.742	6659252.82	6818681.865	7177406.002	6885113.56233333	6957939.841	9819703.309	16652288.25	2854220.762	6458041.251	12180956.51	2781122.345
35	Betaine	forward	118.0863928	317.803	199003963.5	375601531.8	197990464.7	173258934.6	186079101.8	189110739	240401201	217309776.3	214339874.5	210502201.2	214050617.333333	196538670.7	162122382.8	270900586.9	219396016.4	183920732.7	244678376.1	211439116.8
36	Metenamine	forward	141.1133475	527.888	13722470.68	14002495.51	49458025.64	23168794.88	11776120.31	10604753.24	48782927.74	13288828.65	9517380.193	11315489.51	11373899.451	12123924.06	12168410.12	12239595.98	11662143.25	17023951.98	11523273.93	12066271.98
37	Adenosine	forward	268.1040943	180.957	2033928998	3128490832	2309863146	1542039404	1587224244	4111086305	2074551777	1486159649	1507004806	1534560726	1509241727	1371024211	817363032.4	794443021.2	969559547.1	708680820.3	606291444.5	866911617.6
38	"13,14-Dihydro-15-keto-PGD2"	forward	353.2301707	221.06	2226372.461	1875882.645	1181907.942	2391567.85	2186659.757	1910105.992	2480754.575	3958496.23	3752759.456	2712598.332	3474618.006	3906316.793	2964039.103	4126352.767	3133809.555	3980052.805	3387457.937	4276274.025
39	Cinncassiol C2	forward	365.1935793	211.252	8713373.746	2784523.993	1730275.598	2301130.062	3015416.041	2193876.705	3326556.588	5312739.116	8441754.922	4280896.879	6011796.97233333	6773566.902	11475918.82	12913031.99	6580752.366	23045364.89	17225648.49	7347318.389
40	1-Methylhypoxanthine	forward	151.0614587	129.925	29612000.03	31711550.78	23884160.49	43890693.36	25235647.45	10720539.98	23852523.56	27305063.62	27273833.88	28037545.1	27538814.2	23863987.85	24017291.21	20591385.58	29588535.14	29037524.73	20588541.33	12158280.85
41	Trigonelline	forward	138.0549915	323.137	8194023.867	10637319.22	7938285.701	6377335.694	7539474.931	11051028.38	9844156.334	8559796.934	8414205.917	7862967.723	8278990.19133333	6558688.274	3615328.099	8069266.865	4797467.678	7315978.584	6558099.837	5875538.831
42	Proline betaine	forward	144.1018083	290.862	69626483.41	15135661.48	28465476.96	18121064.35	88224689.53	239113652.5	5688145.005	14485374.85	11483594.61	15915798.24	13961589.2333333	3605226.864	4297241.096	3775854.155	8465051.071	9898768.107	4042003.501	4286771.885
43	2-Pyridylacetic acid	forward	138.0489578	232.3465	10416141.88	34732161.48	11431553.98	5857887.112	24292292.86	3914043.342	60006840.31	8644250.632	8804046.435	6087075.405	7845124.15733333	8035048.807	2118954.561	9884103.002	7314504.847	6319756.46	4509543.894	7472533.48
44	2-Hydroxy-4-methylbenzaldehyde	forward	137.0649869	168.039	252056978.6	135143514.3	122165056.7	251172648.2	244821878.5	270778074.7	75534588.1	187895781.4	195123627.8	186091550.8	189703653.333333	179081822.6	153270038.1	145185330.9	185379947.7	108126321.2	145003205.7	154404950.2
45	Methuyl tanshinonate	forward	339.120681	329.816	875367.6514	271976.421	NA	1251670.78	89316.23561	592180.1802	1046962.082	3680910.768	3200510.269	4309991.737	3730470.92466667	2517737.41	1866524.165	1844121.055	8746719.957	7455792.848	3282321.944	965737.2159
46	Zymonic acid	forward	159.0276979	180.948	322880950.1	434562048.4	415864292.6	286683554.5	404669138	271362625.2	443142532.4	327866459.2	311409599.8	227876015.9	289050691.633333	317169805.4	162214980.1	276505633.7	146454683	322254707.1	133037380.6	198593753.1
47	D-Aspartic acid	forward	134.0449596	418.749	8505808.356	15115606.4	5167044.849	6614872.489	6045620.176	9166397.686	8545725.049	7139221.989	8182617.233	7559464.649	7627101.29033333	9504271.852	1897422.469	8206267.767	5622472.925	6199583.578	6759568.386	7181326.751
48	N6-Methyladenosine	forward	282.1190621	267.77	772437.1585	1568063.805	664932.2791	763497.4052	1047101.619	534543.0813	1353103.983	798339.2339	865577.0615	724475.8136	796130.703	329393.3564	469685.5196	657098.2681	80507.43258	380843.8853	311574.8038	586646.8788
49	Deoxyguanosine	forward	268.1040972	209.999	75799734.14	95862717.55	73436206.89	59694971.41	50750720.79	157286520.4	73040356.84	57899177.17	44501887.07	62999001.76	55133355.3333333	29668337.12	20729332.4	26221601.54	43822944.98	17682251.83	23406067.19	20686338.2
50	sec-Butylamine	forward	74.0968759	566.457	2372574.182	2447842.835	2458145.991	2934522.237	2877774.123	2922645.025	2657843.831	2397135.07	2426486.39	3121659.244	2648426.90133333	2381424.866	2744536.776	2941672.173	2364363.866	2456035.163	2407622.28	2078608.219
51	N1-Acetylspermidine	forward	188.1756281	434.627	5751103.422	35271550.97	31851398.6	20967627.36	34549423.7	5263580.877	8267973.664	26550437.95	11315909.9	19184816.88	19017054.91	6588793.028	18164613.47	22899791.93	27840019.67	8095093.667	4767701.26	27413021.25
52	Zeranol	forward	323.182967	298.508	8915095.218	45044785.23	36736677.24	52252560.55	37331791.37	20441935.4	6999454.009	11711061.55	59877114.35	8292330.91	26626835.6033333	19434484.97	5825493.223	31631454.85	42192947.46	12319501.91	44932860.64	45018961.61
53	Bakkenolide C	forward	349.1979148	254.177	2956078.6	4543641.739	3334513.56	5137638.522	3336045.217	2042408.461	4043694.59	3711309.716	4144227.087	2818264.442	3557933.74833333	4005668.985	2816030.166	3331577.88	2256049.368	2861149.646	3182348.401	3466653.524
54	Guanine	forward	152.0564799	246.537	93041884.02	104549771.4	87971990.1	50935011.66	107626910.6	78987499.77	233055891.3	87778793.69	86762188.16	85149262.07	86563414.64	75536817.76	61239321.2	87333075.25	28039096.71	67002652.56	29232713.21	63268423.39
55	Kynurenic acid	forward	190.0497099	202.873	77815442.01	65126743.42	51865928.6	57598702.95	74880441.42	56950891.06	59861476.31	71123691.2	63684873.63	65435760.05	66748108.2933333	76147173.96	56849412.32	65032082.05	88203181.81	79383424.42	59718726.71	39503272.24
56	3-Methyladenine	forward	150.0774684	120.9065	40187055.7	40094408.2	43522959.56	29181200.87	35119981.72	56392260.77	40906685.04	31807242.94	36620621.74	36800954.89	35076273.19	28629713.05	17812806.5	31479494.25	23299356.15	29802000.68	19614990.67	25712675.47
57	Triethylamine	forward	102.1279831	205.427	7619241.381	5003221.384	8196680.773	7366779.478	5696581.878	7070736.407	5177183.815	9335640.85	6171888.386	9514966.633	8340831.95633333	6365377.427	10378149.87	5708117.672	7213360.363	4889314.237	7017999.213	5747630.923
58	"(+)-2,3-Dihydro-3-methyl-1H-pyrrole"	forward	84.08122674	316.949	296894238	307142255.7	512097718.5	276034720.5	299976379.4	409702279	331648352.5	287314071.2	290900398.5	288052921.6	288755797.1	53070605.7	54371592.38	89422383.45	67566749.38	73778890.7	67994606.66	65057430.88
59	Deoxyadenosine	forward	252.1090853	144.8725	264394364.7	259050684.3	454129222.8	390882611.2	107462601.6	865199436.8	313741938	262157009	280704896.2	293276327.8	278712744.333333	212543364.4	124040842.2	171853323	91906637.73	83499938.89	89575967.63	150866020.5
60	T2 Triol	forward	383.2041584	212.972	4933213.807	6007357.383	4480339.147	6431906.617	6598026.655	8947806.456	3108909.42	5184533.011	6385215.115	5709044.701	5759597.609	19467947.65	14707151.44	22904527.92	21686238.69	29426349.35	20501637	6314202.176
61	Inosine	forward	269.0879107	233.3855	52558461.66	131180222	112154496.5	26368680.87	76748687.55	65456475.53	180617827.1	60960587.88	62388832.43	62312512.62	61887310.9766667	35177850.82	16244563.95	55297739.01	34816090.95	35498253.65	29007393.09	27476121.35
62	1-(2-Furanylmethyl)-1H-pyrrole	forward	148.0755849	207.134	3873431.115	4981597.313	6268468.789	4822232.162	4922548.717	3976983.795	5918572.076	5202411.386	4554230.775	5038403.487	4931681.88266667	5862486.504	2755163.597	3640097.406	4762470.478	5099884.832	4919974.454	9768716.395
63	Guanosine	forward	284.0986493	281.8205	35994669.34	42020724.06	30956731.82	13021352.67	58970215.16	29335933	79525748.52	29517500.93	29925074.16	29676250.33	29706275.14	16624893.57	9601069.768	36659137.67	12586791.47	17498986.45	11381854.77	20472983.89
64	1-Kestose	forward	527.1588342	469.507	1824931.793	211904.4928	307914.0972	141482.3149	407819.1877	2797187.986	405995.2787	781985.4691	836023.9013	787417.7801	801809.050166667	590869.4127	389954.8668	724120.0573	567522.6316	594514.1599	706999.8089	418893.3573
65	"2,3,4,5-Tetrahydro-6-(5-methyl-2-furanyl)pyridine"	forward	164.1069779	78.3188	2390922.209	1938112.251	122262268.1	3524594.608	812262.638	2599969.224	5261298.804	15219844.06	15631895.63	16840436.41	15897392.0333333	12447133.81	19823938.19	6858401.236	9368447.793	20514431.55	14767066.32	15362691.18
66	Methyl 2-aminobenzoate	forward	152.070544	273.213	3531663.062	5306170.918	3228544.784	4853771.959	3238335.15	6312792.112	5667422.994	5281973.598	4239092.188	5394465.811	4971843.86566667	6778947.484	6170119.768	5606768.815	6430598.795	8243152.867	6247789.304	5777350.652
67	Nicotine glucuronide	forward	339.1559779	302.3095	20754927.75	11952987.79	10929083.03	34601777.87	11472712.44	22525435.21	22133871.18	28687204.16	13465986.2	34109229.71	25420806.69	15602613.84	4069355.613	11013178.74	19693828.49	17818524.15	17737512.96	15610034.21
68	"(3b,6b,8b,12a)-8,12-Epoxy-7(11)-eremophilene-6-angeloyloxy-8,12-dimethoxy-3-ol"	forward	395.2399072	295.868	867408.3733	1347235.847	990933.8437	982377.2955	1525857.145	265825.4566	1157551.19	1757849.644	2285827.244	1362678.043	1802118.31033333	2716716.509	2170576.856	1023183.287	3604184.577	3400534.344	2526398.481	2261924.131
69	Oleamide	forward	282.2790346	195.59	2315568.65	10049455.81	5867261.092	864535.2876	3344154.111	7617250.513	2340231.783	2513679.865	2116360.336	2268937.173	2299659.12466667	639451.9341	171627.9706	3552597.674	1304628.644	702570.434	947318.0802	3050254
70	"2,5-Dihydro-2,4-dimethyloxazole"	forward	100.0759863	54.4623	122786407.9	116846787	104656271	138803442.1	91172719.19	155270958.3	121826395.7	115349958.9	115515568.9	119915161.1	116926896.3	124712426.5	96718791.9	122141684.3	119090433.8	141790806.2	100997457.5	75099251.35
71	"2,3,6,7-Tetrahydrocyclopent[b]azepin-8(1H)-one"	forward	150.0912828	49.47545	89400302.05	5267001.769	22235193.3	7673195.38	6464794.264	2764740.233	3587849.102	12803197.22	13304974.2	13080670.16	13062947.1933333	6382648.45	14031064.49	2301355.741	5174965.405	4634743.533	6271137.132	5039711.259
72	Phenylethylamine	forward	122.0964436	194.882	13507873.05	27818688.93	16366188.14	13103487.42	13182592.53	19412652.28	13787590.62	13929717.85	15770312.53	5206729.476	11635586.6186667	17939587.15	7003902.498	20851996.04	10289466.37	6613068.781	38051054.83	16473245.49
73	N-Acetylhistidine	forward	198.0871722	330.895	1961379.529	22944710.47	10295569.5	10049647.53	14697126.77	11754705.69	16277586.04	10869821.09	11385293.96	12086503.72	11447206.2566667	15965812.36	2733030.008	12415653.93	7493943.5	9009464.973	9582888.252	18840078.49
74	Isobornyl propionate	forward	144.10179	369.8865	8323112.151	15206354.99	8161996.34	18966755.25	3080646.631	12254878.3	3449379.616	7428768.669	7561996.331	7653448.447	7548071.149	4098822.628	3659267.908	2066839.861	4547467.76	5141047.915	4382597.982	5664319.149
75	3'-O-Methyladenosine	forward	282.1191996	96.8552	9870313.215	14562897.52	23957821.87	10730352.29	4712597.169	23940952.16	16694371.04	12618332.76	12756277.07	13536538.35	12970382.7266667	14157283.22	6230964.864	7274596.423	6892243.565	3176454.866	8789373.046	7461319.65
76	"(10S,11R)-Pterosin C 4-glucoside"	forward	397.1830903	315.2075	1455349.286	882976.598	955497.4725	655908.8978	1173249.642	869871.6171	919051.3209	3509462.987	9484466.601	3188235.942	5394055.17666667	5676640.705	4187513.594	3875429.67	5331627.177	6986182.055	5409540.334	4340507.212
77	Cytidine monophosphate	forward	324.0590848	449.7415	596629.7262	2929295.352	3002984.024	1208341.071	2505654.375	3477745.678	3634941.037	2051642.741	1984464.871	2300407.779	2112171.797	1915280.059	602304.3133	2675097.532	2188085.794	3742093.161	1027790.542	713457.2365
78	"1,2,3,4,5,6-Hexahydro-7H-cyclopenta[b]pyridin-7-one"	forward	138.0911367	48.2939	7593925.506	8738311.116	8106754.999	6255316.679	7984507.899	10506258.12	9831823.928	8574644.18	7692628.217	7422725.095	7896665.83066667	9007439.796	8909655.708	6960938.074	7513548.743	7732467.893	7860213.191	7127941.836
79	1H-Indole-3-carboxaldehyde	forward	146.0598428	61.598	51566880.1	28763786.58	43260287.61	39953037.84	44589736.43	40386633.71	38276879.45	71607498.25	75968925.05	76940071.69	74838831.6633333	91967699.54	118268486.9	81503142.9	98237322.86	84994114.69	106331841.2	91729772.49
80	"4',7-Dihydroxy-2'-methoxy-3'-prenylisoflavan"	forward	341.172015	317.5205	2972237.092	1448991.465	2227693.994	2320306.094	1556995.976	9364455.032	2193832.31	1977004.95	1263975.124	2684593.187	1975191.087	822070.588	851651.3691	1601525.153	1611146.414	941689.5405	1007704.648	983100.3872
81	Lactapiperanol D	forward	325.1998752	321.45	1346067.761	828825.59	830893.4248	2144601.145	1262678.784	10262637.11	2054421.515	5391398.353	3841176.009	2482001.885	3904858.749	8856024.094	4065377.807	2819203.065	4129283.613	4708744.889	3835527.769	2711492.62
82	"L,L-Cyclo(leucylprolyl)"	forward	211.1438289	249.026	788139373.3	195611517.6	197362031.4	201652038.5	50190696.44	43086069.02	177833242.8	135863986.3	137988723.5	134910601	136254436.933333	5058426.978	3004472.237	8682191.634	36311973.5	19643733.73	3250656.331	11514447.76
83	Citrulline	forward	176.102771	409.6975	30187777.43	25633741.69	25495699.5	13020407.94	46233090.88	29874020.54	31905849.94	21356842.03	20020440.57	19872478.2	20416586.9333333	7452849.565	10358346.73	13886307.33	17874022.09	8021203.28	14927094.5	9173838.932
84	"4-(2-Furanylmethylene)-3,4-dihydro-2H-pyrrole"	forward	148.0755485	51.9185	41002525.79	6263549.875	13396054.71	9041400.792	23751956.06	5600962.143	25204892	17105888.57	17072514.58	18137459.2	17438620.7833333	17777086.18	23042747.71	8871825.408	11443624.34	21483332	20462137.83	15957819.23
85	6-Dimethylaminopurine	forward	164.0929185	63.0964	3695735.025	7505022.15	4170527.42	3005762.556	3649614.807	4112352.606	6670647.476	3033340.665	3444618.187	3444697.489	3307552.11366667	2680208.351	1410711.23	2638441.371	1505239.44	2195047.652	1933687.945	2209423.232
86	"3,4-Dihydroxybenzylamine"	forward	140.0704596	73.6425	7420217.767	3731417.156	8414816.578	5135333.623	5943095.045	10149273.86	8789456.072	10022790.18	10441611.21	10991279.61	10485227	17753862.51	14513811.76	11869065.69	23800542.62	12512257.65	14953999.45	10718895.74
87	Gentiatibetine	forward	166.0862535	80.5935	394168016.7	35117737.35	150708944.8	70621039.3	39528302.35	32264581.65	24414266.24	108700627.1	107163178	108545960.4	108136588.5	87707090.19	232643607.1	27414145.84	51110946.2	84149254.52	91351525.27	29919999.41
88	Mangostinone	forward	381.1665822	288.496	98500.30908	101715.2636	119364.5567	207892.3892	31058.05943	55349.90772	NA	131756.9741	317303.1843	104845.7216	184635.293333333	613658.9034	987124.0413	161900.8805	972841.4432	394036.2149	824997.6733	614175.3562
89	Phaseollidin	forward	325.1366094	295.083	1159890.867	1025248.394	1465405.267	341953.4691	466283.2087	264166.3008	833312.1032	265133.4909	304509.8441	NA	189881.111666667	NA	NA	NA	NA	NA	NA	NA
90	Purine	forward	121.0510626	101.193	20164776.74	66315241.77	9381930.876	10677568.71	31877681.57	18678570.09	7958093.658	12193980.46	13160845.87	12555420.58	12636748.97	7796409.954	9180265.342	5984476.433	10020954.23	8351677.815	8749668.769	9033813.862
91	4-Aminophenol	forward	110.0603298	15.32415	659920.6874	627964.0516	703699.6762	593587.696	569109.7881	629209.8845	634469.9824	693513.525	635539.4678	660578.9732	663210.655333333	593450.6233	599274.3334	615244.1738	83901.80477	565136.3894	648929.2759	621788.2397
92	Creatine	forward	132.0766939	370.169	175077516.3	41272709.46	17997748.96	68969325.95	11497441.77	71248102.19	34723921.74	164106775.8	153938621	155848303.8	157964566.866667	43407089.31	622323.1657	516703706.5	316006883.3	76762824.85	253165220.8	117295700.6
93	3-Methylguanine	forward	166.0724558	200.126	54632291.38	91932996.28	57830450.7	24225719.7	37739766.72	52815777.49	123962559.7	48964826.13	47643638.18	45451484.51	47353316.2733333	43941994.24	23254599.2	43852943.48	26939938.16	42359623.94	24490947.24	38977546.68
94	Squamolone	forward	129.0659215	201.827	20028442.47	15070127.25	17988692.55	13242722.39	13473430.81	20136467.71	26187980.54	14872333.88	13967726.71	13752045.04	14197368.5433333	10017281.64	11651968.67	10273849.79	10886799.87	10854219.9	4153664.054	6704350.043
95	Cotinine methonium ion	forward	191.1178129	225.02	3430664.138	12975922.34	17633262.26	5952953.896	7871359.659	5932076.878	8609114.635	12508258.66	12001019.41	12674949.43	12394742.5	12114168.54	9149586.315	7417872.652	10214275.07	11288576.6	13628478.83	19122691.27
96	"3-(3,4-Dihydroxybenzyl)-7-hydroxy-5-methoxy-4-chromanone"	forward	317.099638	238.1855	2854629.562	390895.0019	875535.8613	3548811.07	357454.0418	4564823.594	3415829.077	3111062.985	1727245.82	5371034.147	3403114.31733333	754561.069	2317872.745	2231770.374	1746720.673	1072527.531	1404822.424	1172255.059
97	"3,4-Dihydro-5-(5-methyl-2-furanyl)-2H-pyrrole"	forward	150.0914082	221.82	23192513.1	9164341.074	16971479.46	8352357.815	21359131.24	10879898.7	27359865.43	22866694.47	22701094.34	21896935.6	22488241.47	12077216.38	15519465.5	16179372.23	10168628.12	17336135.8	26773224.2	19939127.06
98	1-Methoxy-1H-indole-3-acetonitrile	forward	187.0867177	199.244	6309604.561	6489980.661	5819767.225	6079379.456	7441201.027	5463981.587	5102763.362	8333703.678	8363899.815	8100097.385	8265900.29266667	11452567.52	10865268.84	7821174.857	9914254.953	10046458.09	13342383.14	12056142.28
99	Pyrrolidonecarboxylic acid	forward	130.0498727	410.467	26702114.35	4038172.31	2462389.639	2794710.435	17542278.01	25889561.66	2410073.386	6557141.827	17743653.94	19359488.24	14553428.0023333	16217154.19	6599880.036	18396466.56	10797625.08	13131174.36	11975246.07	11994992.93
100	Histamine	forward	112.0872623	369.61	4597447.118	7527279.954	4061526.274	3595822.983	2657999.695	7768396.614	5331222.578	5766807.281	6219793.133	6545640.589	6177413.66766667	5303818.985	3182216.637	6670514.347	4693193.202	7974768.077	6573578.922	6680019.098
101	Xanthoxylol	forward	357.1332704	24.77105	3339689.037	6505833.223	5269986.374	3586454.986	1444218.513	6321641.929	1828256.988	2357086.541	2466938.192	2589921.053	2471315.262	928611.001	802724.4163	851470.0297	984492.1939	2181074.391	1100248.321	1768604.317
102	5-Amino-6-ribitylamino uracil	forward	277.1138722	145.62	NA	NA	NA	NA	NA	NA	NA	35216284.42	34493524.32	34346805.77	34685538.17	23371065.48	26035114.64	305047169.7	25891483.31	32506702.48	24369403.59	43989039.34
103	5-Amino-3-oxohexanoate	forward	146.0811672	170.609	963984.2734	NA	359981.0011	NA	NA	190230114.2	NA	25791220.27	32593763.04	34377180.31	30920721.2066667	1721949.49	1487990.15	NA	745420.8395	NA	923203.5635	1005736.278
104	"3,6-Ditigloyloxytropan-7-ol"	forward	338.1956147	412.246	496595.5594	381720.4168	325540.0094	544548.6873	378222.2017	448170.2057	487508.0543	430216.3169	952815.6091	875186.3623	752739.429433333	1294789.924	1393893.668	1734143.789	1462687.453	1264143.867	1512862.482	818232.1086
105	6-Methylquinoline	forward	144.0808282	201.803	100697524.6	309983020.6	63112317.76	27343435.36	116165835.1	74520317.96	111476803.1	96498124.07	101858991.9	94796718.57	97717944.8466666	204413716.6	50964216.27	180248414.9	100536622.5	138557405.5	86388576.31	204717299.9
106	Riboflavin	forward	377.1448516	232.609	1897818.458	2485747.728	1203644.207	1212290.597	1143245.575	2096786.023	2901012.534	1383388.57	1413762.323	1398962.998	1398704.63033333	771906.0071	564517.6389	837642.7983	NA	1086044.014	483719.1069	1142679.623
107	N-Acetylhistamine	forward	154.0973703	148.144	287486372	894813640.9	245754847.6	314065827.7	254041103.3	461978620.4	511026026	395109088.3	399942852.7	401997014.4	399016318.466667	404331738.6	94043752.29	515561196	225108492.5	595263560.5	289671838.7	631294453.2
108	Deacetylisovaltrate	forward	381.1882586	216.2275	3702718.212	3011205.633	2995951.039	3995096.856	3166108.138	4068626.317	3953702.114	5597864.185	8238923.935	4384271.005	6073686.375	11420933.71	4824534.288	8652946.802	4385666.415	14049221.73	12787591.4	3698452.589
109	Acetylcholine	forward	146.117551	35.9506	21382748.51	5987668.794	1326999.295	15500650.95	11711109.39	15264641.03	8107037.386	12107448.57	16266123.83	16512246.91	14961939.77	20856735.63	8450345.985	10714006.95	7229546.008	13750585.04	10577849.08	7596704.425
110	L-Glutamic acid	forward	148.0602215	411.297	141083555	61501597.19	158599705.2	82027220.55	109624030.5	91928745.9	107839683.1		136364820.4	136735004.9	140633948.3	182791273.2	231062801	132524757.8	131103467.6	156846213.1	178276066.4	161553262.6
111	Anhydrocinnzeylanol	forward	367.2092589	322.948	6133983.472	4889849.28	10315996	6738539.544	7427269.344	7018666.929	8931776.171	9788093.815	11237696.08	7256738.91	9427509.60166667	13566953.43	3801447.574	14703585.18	9855338.025	10722721.21	15420495.53	9349611
112	(-)-3-Cyanomethyl-3-hydroxy-1H-indol-2(3H)-one	forward	189.0658543	76.24095	18911146.06	11887020.68	10430929.56	12955398.43	18555141.68	12938033.39	23954012.57	28955056	30584514.31	30847040.16	30128870.1566667	38931726.55	42246093.52	26361285.28	44776308.37	41401196.18	54081716.5	35643148.61
113	O-propanoyl-carnitine	forward	218.1386373	399.298	6343378.036	658082.6973	4105073.063	6948381.266	8778201.527	7186608.308	6903865.657	4909263.782	5039807.916	4806915.288	4918662.32866667	3971889.148	2279977.162	3998280.194	4082095.193	3018098.898	4069027.878	2553451.625
114	Glycyl-Valine	forward	175.107557	301.666	19057898.67	19769232.66	18046186.37	8157789.184	22770206.8	13863613.21	14089518.02	10478884.63	10749208.71	9589065.936	10272386.4253333	3128128.765	2372898.852	5633028.288	5182311.691	3257037.524	7702218.921	3876719.097
115	"LysoPC(22:2(13Z,16Z))"	forward	576.400351	228.064	190710.741	965570.6918	391185.6188	275886.958	190555.3428	409932.4852	368581.7211	514874.4462	518492.1694	402752.0567	478706.2241	498649.0069	703299.7522	150228.6821	86018.98639	276984.49	307821.7437	430300.6698
116	Bisnorcholic acid	forward	381.2615632	139.7805	5864325.149	3734090.254	5703223.657	5811336.354	7725940.656	4167520.263	7868062.892	11244447.65	13435599.92	8770877.069	11150308.213	11784085.75	9943281.073	8090666.664	10650541.4	10322267.63	12130073.93	10695027.76
117	"(2S,4R,5S)-Muscarine"	forward	174.1487759	218.2905	22927593.81	1070916.061	6351352.618	1779917.1	1466769.804	2103860.429	612575.0221	3798805.648	3301308.178	3392432.626	3497515.484	3370626.582	3474808.305	1912970.182	744371.5028	546417.5963	2616421.594	1814492.977
118	Vignatic acid A	forward	554.2841432	132.535	29288590.36	30852076.84	35982369.44	30973927.91	41246480.87	26249941.86	37286140.73	13281277.71	13670293.16	13279718.36	13410429.7433333	589906.6108	561580.7263	620109.6228	349603.3664	118246.8696	313131.356	440735.5728
119	Isoleucyl-Glycine	forward	189.1230926	273.519	23869928.65	39756396.96	61379042.96	16032785.77	32943245.28	14833300.83	22014858.89	13150886.19	13704757.71	13197573.92	13351072.6066667	3090041.86	6436885.164	6081459.937	16658199.29	3952961.311	20602456.18	8320445.002
120	Deoxyadenosine monophosphate	forward	332.0735376	320.4195	14364546.36	19205211.77	13681551.81	15216278.75	17703927.42	61675498.28	27022599.11	10302762.93	10141271.29	24267734.1	14903922.7733333	2965028.54	2170795.381	17461812.5	9280242.92	2102867.803	7794409.075	13556819.64
121	3-Carbamoyl-2-phenylpropionaldehyde	forward	194.0811503	276.9705	4036877.695	1821596.315	1570852.205	1107871.072	3210934.976	884338.2456	3304088.077	1668446.175	1725556.37	3975879.739	2456627.428	526735.2708	932090.717	548367.5246	611687.2843	570457.6611	1231382.411	1119643.085
122	5-[2H-Pyrrol-4-(3H)-ylidenemethyl]-2-furanmethanol	forward	178.086211	208.5235	507194.0536	2346878.756	3731651.493	2525158.336	1726317.347	2104884.056	1786706.085	4148946.015	3947919.833	230345.5839	2775737.14396667	1673264.303	251872.3534	904146.4971	1780519.715	2113819.858	3155422.941	1487509.306
123	Cohumulone	forward	349.1983081	153.3685	11044212.4	15139979.25	8979455.991	9091623.34	19033595.67	7941065.534	9619478.503	10506264.97	16915950.45	9882354.099	12434856.5063333	17910732.47	7997947.532	41721866.95	16494139.17	16751283.46	16706708.67	14168932.59
124	4-Oxo-1-(3-pyridyl)-1-butanone	forward	164.0706598	206.73	5902336.945	1054904.024	9410588.898	3853126.387	9159591.536	7805288.639	15467908.29	9069246.578	5950948.614	8376565.874	7798920.35533333	18090195.77	1614621.294	460398.0407	2027101.283	10521881.04	7151149.564	18820719.02
125	Tryptamine	forward	161.1072114	201.934	20901724.82	65604344.12	11789072.28	5154546.57	23352016.08	14068575.77	21646497.01	20239371.54	19105032.11	19086854.67	19477086.1066667	42201881.02	8873120.269	31760836.23	19800287.69	14057392.33	16929940.84	45893171.76
126	Phytosphingosine	forward	318.3007149	186.126	2920907.928	2701938.016	7062949.84	2936074.148	3575710.633	4134045.819	2854987.397	1520577.316	1791110.98	2012278.99	1774655.762	NA	NA	NA	NA	NA	NA	NA
127	1-(1-Pyrrolidinyl)-2-propanone	forward	128.1069044	56.42405	11848020.4	21031019.21	7003164.508	7593587.481	13052326.26	10062558.32	15558819.1	10019964.48	9940744.149	9848009.515	9936239.38133333	6352413.427	7218878.472	4759720.452	5822575.707	3936424.725	7099485.615	2112977.318
128	Vanillylamine	forward	154.0860716	102.088	61442129.07	26616293.66	65670121.25	37394110.66	135586814.4	28958745.63	80513649.37	61857961.77	64877156.01	66836027.13	64523714.97	50672259.74	74443588.98	119535170.6	78415672.1	37187329.95	86317640.24	72069498.99
129	Sarcosine	forward	90.05530032	51.3902	31298457.59	26545602.83	32624774.68	18931335.83	29872505.33	24879984.71	36897430.19	25616243.54	23841041.11	25107323.24	24854869.2966667	17577949.21	16148692.08	16984685.35	20181149.47	18327456.95	18502206.42	12738729.6
130	4-Amino-2-methylenebutanoic acid	forward	116.07071	100.5274	15371915.18	12124952.43	13784374.46	16207182.17	18464929.9	19136789.48	17181957.46	15664996.99	16478632.37	17323999.52	16489209.6266667	14162265.07	14525393.15	15164566.51	17884764.1	20980076.12	14368367.9	10596330.04
131	Norcotinine	forward	163.0866729	113.0615	101523714.9	98956168.7	72869346.13	60118503.08	101256614	91995449.86	30078860.97	45927730.01	47949843.57	48961634.99	47613069.5233333	10659131.62	13573852.75	14974316.53	25070083.91	4301994.353	24899988.63	17021018.19
132	"1,2,3,4,5,6-Hexahydro-5-(1-hydroxyethylidene)-7H-cyclopenta[b]pyridin-7-one"	forward	180.1019496	73.65665	11161125.12	5492565.489	3474430.476	7984007.663	5982958.201	6513714.273	8266119.304	7978037.347	8874543.49	12318722.16	9723767.66566667	9706146.907	11903310.79	6938035.797	9173538.844	10897586.16	12174725.71	7384121.055
133	Tridemorph	forward	298.3103646	120.666	7568262.672	7865146.463	10410426.98	9918321.293	8550465.812	14927713.78	9318865.082	6038228.337	6117959.537	6524488.346	6226892.07333333	3991366.836	4140055.127	5949828.005	5857211.737	4982277.537	5342203.243	3395011.141
134	Tangeritin	forward	373.127816	40.2707	1048401.369	1307778.89	1058205.502	587935.4131	1433157.214	943294.3855	1497327.641	1799680.168	1695866.325	1429687.991	1641744.828	1082085.503	1236779.811	1932120.175	1476861.763	1285087.916	1613444.593	1979533.66
135	Lenticin	forward	247.1436321	306.2285	9929544.2	9994185.679	7685280.304	14127199.15	7505188.73	9283582.263	8483304.415	10303814.81	9637729.797	9744524.26	9895356.289	9950961.798	10656721.22	6604330.639	11836026.92	10324928.39	9207512.791	6643040.218
136	Asymmetric dimethylarginine	forward	203.1503658	512.363	23220521.1	30922218.52	20532724.69	16631693.6	16128279.12	24876275.78	10600524.84	13692137.18	13341216.95	13669476.46	13567610.1966667	5723789.022	3732707.995	16716549.45	9975736.626	7315486.826	9641981.027	7797172.305
137	"6b-Angeloyl-3b,8b,9b-trihydroxy-7(11)-eremophilen-12,8-olide"	forward	381.1882416	324.0145	2724547.622	285817.7221	883341.833	3365043.355	984309.0122	3469743.578	3046985.13	4957697.021	6661540.75	6019015.618	5879417.79633333	11232671.48	11601120.36	7967372.078	6429397.708	10421133.73	8449552.491	3557465.531
138	4-Butyloxazole	forward	126.0912956	46.983	4979209.464	5342178.872	11557487.75	5806223.772	15388466.54	4803103.659	12116068.03	6171555.436	7624682.941	13704091.09	9166776.489	12339043.08	6918265.748	9007082.525	9342828.675	6423919.653	8839899.081	10834779.83
139	Trimethylaminoacetone	forward	116.1072355	201.8865	2056824.814	970327.3962	1662818.544	1304543.999	4026572.991	2729058.137	2869838.71	2387695.133	2347845.012	2411201.508	2382247.21766667	1046997.504	4367611.431	3447325.845	2958521.213	1598683.112	2749995.143	2299264.7
140	LysoPE(16:1(9Z)/0:0)	forward	452.2777736	224.129	7143251.912	10021402.14	7840634.854	4021549.533	11346868.95	5844877.777	14501124.71	5167659.728	4948394.848	4947718.35	5021257.642	1024448.74	1035326.872	4473776.264	1718935.969	1914951.439	1933658.723	1678430.532
141	LysoPE(18:1(9Z)/0:0)	forward	480.3077918	220.036	41952960.83	76723147.03	68294632.18	45636586.39	39967986.34	10502460.95	42357856.64	35854399.01	40568664.92	37958548.64	38127204.19	12416703.09	6915671.47	47314166.88	23396597.22	23478687.86	16815024.83	2692484.961
142	Osmanthuside A	forward	447.1620949	225.4325	2046411.826	1482812.782	827378.7791	2345281.084	NA	5970289.462	2900686.395	3383678.343	1923462.668	5597531.097	3634890.70266667	1105919.448	3093702.024	2738129.333	973148.9367	1446132.874	1937450.437	1902657.15
143	beta-D-Glucosamine	forward	180.0877916	145.5765	8724361.602	12816165.54	8184197.415	5662327.513	6155669.287	8018754.149	10845916.44	8727229.732	9311695.236	9611410.519	9216778.49566667	13050766.68	4539079.928	11567237.54	5392399.922	11352947.72	6645133.542	11691021.1
144	L-Phenylalanine	forward	166.0863466	270.137	274141373.9	438079490.7	219622782	179242382.6	287428303.9	247823771.4	259215890.3	223052141.2	218412344	7406453.75	149623646.316667	12052061.05	12709665.94	246099641.7	166993784.8	171240837.1	199408342.7	210987190.2
145	3-(Isothiocyanatomethyl)-1-methoxy-1H-indole	forward	219.0602271	373.53	5312971.618	495638.8992	752275.8491	5559402.221	399162.2179	768854.9886	6541134.578	9471533.686	2143301.881	10937127.58	7517321.049	17140191.96	NA	11916166.4	19423284.5	13196594.61	19150759.86	12009301.27
146	"1,3,8-Trihydroxy-4-methyl-2,7-diprenylxanthone"	forward	395.1862581	180.083	NA	1411543.098	NA	504812.7887	176202.8917	NA	440235.5049	1054031.698	1291665.349	1098401.703	1148032.91666667	3165949.306	1568105.029	3405669.521	639331.3906	2941246.308	2172552.955	2330110.809
147	Junosine	forward	326.1364493	361.6955	512479.5102	663069.8893	374921.2689	478904.8476	NA	32207.65572	339680.0761	1658078.96	1605587.488	1658086.793	1640584.41366667	2446517.166	2854851.806	313082.886	2285017.05	2027799.133	2108575.497	1408199.43
148	Prostaglandin G2	forward	351.2143116	181.805	46476357.27	28248777.42	17635844.04	20870336.82	38875941.08	15859798.74	19269848.52		37286336.19	25293144.15	27782247.58	19108001.3	11728389.63	9657048.306	18063078.09	21321797.48	12905442.71	17298667.57
149	Blumealactone C	forward	325.1618314	225.7895	921443.1232	1492206.448	1220845.932	2051743.017	1391078.853	558542.4252	1376206.546	7235672.013	8930860.284	10868998.32	9011843.539	12354609.27	19436126.57	7773038.714	9642135.717	25031260.8	9394353.437	7802228.949
150	5-Aminopentanoic acid	forward	118.0864033	405.6505	182738727.6	178082116.4	137732629.2	154808593.6	112407776.3	267553276.1	136523886.2	197202785.6	200650144.5	193405967.5	197086299.2	177977204.4	142383814.6	225141561.6	175644263.8	161925373.4	180223862.7	131315053
151	N4-Acetylaminobutanal	forward	130.0862764	76.2668	10939791.26	8229637.818	9184227.952	10681714.64	12204547.16	9136864.76	9286353.507	11770849.73	12472314.05	14513257.69	12918807.1566667	11316368.59	11883648.2	10055292.11	14326830.39	12886140.04	12856727.2	7288290.06
152	Phenylalanyl-Tyrosine	forward	329.136268	297.771	203835.9821	61948.19981	76647.05504	373462.2576	947123.7392	477757.0218	168921.0045	373318.9971	137300.9956	1034804.676	515141.556233333	87782.52492	635293.6742	222232.8328	429561.4576	261971.2316	344400.7208	62402.27094
153	Arecaidine	forward	142.0863083	330.2	813412.8276	1041870.957	2653238.387	1396858.053	2584539.998	1386852.561	1699523.142	3025975.569	2770801.992	3273125.139	3023300.9	3784180.532	3441690.847	2759633.127	2614605.835	3448243.92	4473159.775	2286692.634
154	Moracin N	forward	311.1250713	328.1895	7531052.724	2130291.081	2792557.627	10111200.8	2658097.872	8230912.357	7523736.813	8363093.061	6276977.892	12148499.89	8929523.61433333	8204368.658	31337009.82	5898469.035	13019510.43	9617623.19	7798807.257	9214419.451
155	Pyridoxine	forward	170.0813083	181.8205	4795446.576	3242724.767	11695270.77	4622354.311	4844735.802	6309022.154	6795496.667	5392115.535	6411184.966	7057847.603	6287049.368	4664091.68	6990806.266	2202353.09	4611365.381	5282271.835	3845907.149	5267481.991
156	"PC(22:6(4Z,7Z,10Z,13Z,16Z,19Z)/14:0)"	forward	778.5343477	89.1789	1849540.473	3112893.325	1695387.043	5620383.723	139822.7029	3724184.216	1123908.613	3175956.381	2091298.945	856206.5627	2041153.9629	74520.54037	218791.0301	450412.3041	150301.3505	534236.915	680524.5931	1421815.817
157	(?¡À)-erythro-Isoleucine	forward	132.1019575	286.834	413985945.7	597545174	299742602.6	248029005.3	348909351.7	396795050	387761228.7	352638638.9	339468395.6	347332337.5	346479790.666667	337817756.5	168508876.9	415490058.1	267255253.7	239792613.5	406530936	319022795.7
158	Deuteroporphyrin IX	forward	511.233839	212.423	882600.9403	5979477.152	3099439.065	5543843.156	1554761.283	2836925.786	1069757.661	1137307.12	1093142.637	1392177.208	1207542.32166667	NA	111846.6186	38640.04879	NA	973388.2215	NA	NA
159	"N1,N5,N10-Tris-trans-p-coumaroylspermine"	forward	641.3343401	257.781	5578282.865	13027885.14	5794762.421	9642188.767	8028279.224	6601689.99	4923095.244	4288800.364	4472343.717	4328313.137	4363152.406	1284386.726	1690773.413	4085468.555	1169832.902	959334.9488	2165258.424	2370096.545
160	"2,3,6,7-Tetrahydro-7-methylcyclopent[b]azepin-8(1H)-one"	forward	164.1067131	49.6913	15564159.55	2992776.319	2309857.348	3186185.603	2022955.903	2294887.164	2066084.718	3813278.231	2307093.878	3899007.846	3339793.31833333	3166623.907	4322165.572	1818054.409	1888608.689	2841203.616	3778224.291	3506544.452
161	Phenylacetaldehyde	forward	121.0649958	222.529	69845171.73	7403303.893	180338868.3	6790427.578	8221136.589	15265230.82	8143949.456	22248542.75	22512899.46	22395091.85	22385511.3533333	5320947.042	6563081.843	7560213.378	5970084.425	6195047.387	7361080.612	5630414.794
162	"2,3-Dihydrobenzofuran"	forward	121.0649645	234.379	46863531.75	87491512.46	110188734.2	15274949.03	21477065.96	155587636.5	33855462.72	47402245.79	46535551.5	46672832.01	46870209.7666667	17105857.86	16326149.07	59303257.42	17207262.51	23057879.1	20534324.41	22406950.44
163	Polyoxyethylene (600) monoricinoleate	forward	341.3045425	213.644	1420087.298	5789662.513	4279381.457	3380471.736	1649219.635	3712896.682	2676342.161	2605663.022	2411391.5	2465907.682	2494320.73466667	863405.6709	544814.1682	4454513.17	1446988.574	1669504.509	1834323.83	4225872.977
164	Cyclic GMP	forward	346.053989	342.1735	1540858.457	3815758.064	3370104.962	2447497.787	10499794.12	6853854.23	5944537.311	3761208.451	3394897.93	3319379.569	3491828.65	3326641.332	NA	5296753.772	3296022.195	4708355.156	3457191.248	1592588.789
165	Purothionin AII	forward	521.253845	89.1016	453870991.4	472490342	468037209.8	596454547.1	750539217.2	395782314.3	541653846.5	412088590.7	402086437.5	440948089.7	418374372.633333	1278266.343	432877.3738	1151186.968	931060.5031	10790319.77	783950.7166	1202809.738
166	Cyclic AMP	forward	330.0600541	287.886	23484061.32	37702593.41	36889727.82	41643787.02	87633024.25	79126816.76	55408824.67	48043058.11	49111138.3	48962352.74	48705516.3833333	20799321.95	7780539.837	52802256.29	28109170.52	65797757.58	22662624.91	13683969.93
167	Prostaglandin H2	forward	335.2193536	55.5917	61858504.15	59198145.39	54999569.51	32625490.14	92568158.99	35369350.05	51979836.78	67747180.59	44947425.6	29035881.18	47243495.79	21405080.18	14690499.18	15829996.95	30145208.09	13990206.07	16176133.02	31622922.84
168	5-Hexyltetrahydro-2-furanoctanoic acid	forward	299.2575644	225.077	4632654.172	6173728.193	6968830.935	4521269.061	4387873.728	4542129.922	5831189.339	4185762.197	3506412.332	3338231.203	3676801.91066667	1155847.296	1010753.633	3492075.59	1557818.46	1194707.452	1503544.711	2031329.523
169	3-Aminocaproic acid	forward	132.1018618	323.957	5415622.804	6517281.237	3566470.151	3707116.484	36250992.33	7542695.966	5540946.728	10432920.28	8950008.303	9131735.295	9504887.95933333	11721639.4	10215156.91	12772602.38	7077819.491	10679515.25	16644297.22	8425736.467
170	Stearidonic acid	forward	277.2159406	55.91405	13787741.21	8363137.357	12433514	21976997.6	9273076.363	18745169.13	24375668.36	30325528.62	31079395.05	31982993.54	31129305.7366667	45687456.48	60320948.97	32067529.5	31221449.6	43714694.18	43047966.23	42060031.36
171	Norcapsaicin	forward	292.1901564	307.4955	4396361.247	4251715.12	4666971.786	4926338.484	3586697.415	4311221.793	4726401.247	3358607.041	3144155.059	3083220.626	3195327.57533333	2108821.668	2329088.155	2398057.027	1786527.684	2452156.575	2227272.283	1928065.452
172	Blumealactone B	forward	365.1938497	100.986	3473634.943	1086563.203	2303461.703	3077869.641	1587882.739	2110255.332	2464645.963	8641728.241	7814877.139	5621432.355	7359345.91166667	10865534.76	10783227.43	7875731.24	6440420.091	3324339.4	8924485.367	8701391.785
173	Corchorosol A	forward	537.3067777	221.962	258120.4386	984890.4454	2464616.667	1731988.496	1267946.238	1994634.134	579613.8602	1019671.743	989112.2082	885575.4664	964786.472533333	580546.1006	605038.0382	354970.0381	546122.0229	592856.359	499581.6954	501482.0528
174	Sakacin P	forward	217.1181231	435.712	7038293.055	5195088.309	4413735.93	6016389.053	3461307.604	6090590.157	6352553.034	8137459.062	7723937.709	7707301.662	7856232.811	11513474.12	9003607.065	5001660.305	8141337.767	8783104.175	6947257.923	5863703.748
175	Octadecanamide	forward	284.2944157	122.4	31305896.36	31757341.73	44098080.82	45471603.39	34091288	39178153.19	45463663.17	19653677.59	18957246.57	21422766.73	20011230.2966667	13427401.79	15048744.06	22158213.59	21275344.11	12470142.47	22762702.86	11443381.99
176	"LysoPE(20:5(5Z,8Z,11Z,14Z,17Z)/0:0)"	forward	500.2755069	222.677	1991943.391	3748694.42	1730322.369	1459186.517	1585987.861	1704587.91	1879636.041	1608848.23	1624317.178	1300258.139	1511141.18233333	616543.8996	312818.0944	1695921.803	316012.165	894464.4429	450536.8587	486043.6201
177	Tyrosyl-Leucine	forward	295.1652711	423.88	104219.3623	84950.30268	78787.90275	96801.81388	422455.7314	1056885.101	118726.7239	1084092.5	1027021.258	1109987.795	1073700.51766667	1407253.899	1210708.049	1076085.391	2492076.528	2097945.411	1008306.884	614455.6659
178	Biliverdin	forward	583.2561458	261.523	1797620.493	1678878.813	1942875.577	2628458.036	3425381.279	232974.1939	1229767.414	616592.0027	596950.8392	486518.7008	566687.1809	NA	18880.27538	31227.13684	80675.70191	31011.77289	NA	131089.6505
179	L-Threonine	forward	120.065619	367.652	25033524.23	51456263.38	17261459.69	13571436.19	15224509.85	25059240.39	19056665.81	22118334.9	21445534.41	21336117.51	21633328.94	20299889.21	5671740.236	32682956.78	14432532.69	13775833.86	27280867.25	21507554.52
180	Styrene	forward	105.0700417	176.6595	356669968.1	498740374.2	466348275.8	736363053.7	382269396.9	939579514.7	770251835.7	729844313	712198044	720683799.1	720908718.7	731401040.6	346406131.5	472696823.7	455587763.4	419909978.6	1766499567	703465400.3
181	Blumealactone A	forward	365.1936042	180.432	2771226.178	1066511.08	1575934.238	3972398.157	3469863.451	2272003.838	4748650.862	6570425.76	7046382.692	4894293.685	6170367.379	19388118.59	18657705.06	5993204.568	6365578.727	12451657.59	4952659.082	6441422.443
182	L-Threo-3-Phenylserine	forward	182.0813407	100.639	10682852.31	5307679.781	7804294.967	8916066.565	10929290.63	10942386.2	7557321.427	7401588.433	7520619.782	8540209.709	7820805.97466667	8646972.926	12843784.58	6013739.782	10331498.53	6606995.119	10541455.7	8290883.028
183	"Hexahydro-6,7-dihydroxy-5-(hydroxymethyl)-3-(2-hydroxyphenyl)-2H-pyrano[2,3-d]oxazol-2-one"	forward	298.0893251	269.508	5430765.011	10627815.64	5727997.033	3800093.51	8898034.338	7194547.184	8629877.415	5084725.091	6117181.464	4474965.021	5225623.85866667	3350861.162	881319.0048	7488006.954	2245515.401	3918222.629	3096576.93	6738845.155
184	Alanyl-Valine	forward	189.1345524	246.332	356570.4263	303694.0942	351976.7753	250872.4955	1122204.032	34980.86847	145866.9192	218022.7148	220797.1473	197706.7321	212175.5314	207397.9445	456751.8869	NA	364486.939	241430.4059	295362.1495	341693.0074
185	Ecgonine	forward	186.1123911	108.3085	5370869.297	2742113.733	3369084.064	3479172.302	3632895.534	3117129.495	4053902.97	7953791.448	8060103.008	8381355.07	8131749.842	12602125.13	11260288.05	8140630.337	13472044.35	13764407.45	11676547.08	8551729.625
186	2-Propionylpyrrole	forward	124.0756187	48.2939	9263101.365	6239447.788	8695491.011	10001734.85	13330534.58	9493085.682	10323008.56	13313902.56	11446052.94	13643005.94	12800987.1466667	14686435.71	16382492.18	11574436.71	17483135.86	15149221.73	16224445.01	12258744.36
187	Vinylacetylglycine	forward	144.0654983	318.179	13518954.94	25705885.7	8821429.01	10955748.97	9087805.781	13308477.29	12143620.55	16781535.16	16445039.41	16934846.57	16720473.7133333	17792705.99	2650333.004	17150385.98	9596827.089	6602122.209	21170243.59	16927867.99
188	Bufotenine O-glucoside	forward	367.1883805	277.106	828307.9825	5605809.907	306541.4552	14114294.13	4994601.255	334094.5298	24317697.12	9981781.78	5622272.645	14903859.77	10169304.7316667	10816876.11	13861935.2	7034824.78	812671.7407	9207314.296	7564967.138	890315.8319
189	Adenosine monophosphate	forward	348.0705415	442.711	2110399.482	9463114.359	3879140.419	3091345.256	3059201.888	6847103.995	2625143.171	3875197.715	3174564.468	2563212.429	3204324.87066667	1533052.525	640731.5665	5401091.477	3737727.736	5648277.601	919738.0483	628169.9947
190	S-Ethyl thioacetate	forward	105.0371348	365.468	6677989.054	40808570.23	12260874.23	3196089.194	3943836.916	21725565.43	23018750	18768949.36	17909775.98	18786291.47	18488338.9366667	7285446.252	4725710.666	1661836.01	5806712.855	10893271.81	1094319.343	11927904.41
191	"PE(P-18:1(11Z)/18:3(6Z,9Z,12Z))"	forward	724.5239261	184.384	892177.9601	2308988.864	1845652.803	511641.8524	214648.2417	2113351.169	298333.954	309919.5655	407933.1568	408510.816	375454.512766667	309388.7353	NA	1597168.316	473825.1876	709257.9448	954244.1879	386267.7061
192	1-nitronaphthalene	forward	174.0547327	202.682	638455.4867	9069011.149	7609078.88	1850166.129	10865202.93	10980225.87	9834081.057	15210658.28	13713483.89	13445692.11	14123278.0933333	16527128.81	763851.3091	17010589.14	19622568.6	24092321.94	21979661.28	22511707.1
193	Olomoucine	forward	299.1601873	425.338	626230.7644	4519895.273	700355.5823	967528.006	823849.6882	2117970.692	421988.0545	1874167.518	1785645.691	1965848.855	1875220.688	2494414.449	2684506.236	1605152.043	2877224.957	3037975.939	2833763.261	1493276.581
194	Isoleucyl-Valine	forward	231.1700431	215.998	180857322	129034719.3	206195284.9	79424929.46	222529259.7	139231869	240349183.4	110691727.4	110624910.5	110752503.8	110689713.9	11847576.91	36916818.33	39963359.69	28970259.93	20321469.16	30657142.45	29197738.12
195	5-Pentyloxazole	forward	140.1068315	38.3109	8668034.743	10552094.29	9839451.138	13960946.69	5173381.483	14079126.01	13123609.75	10187892.33	10251302.13	10887541.67	10442245.3766667	11419217.98	13680622.38	7252499.779	5265620.944	8172050.797	7954412.821	6432633.856
196	2-Ethyl-4-methyloxazole	forward	112.0757798	47.7805	5512820.601	9088815.104	6451009.334	7356193.461	5433822.095	13471645.27	5072757.781	6495161.026	6346663.402	6146955.16	6329593.196	8356783.576	5750342.081	4201559.123	5206508.991	7388139.499	5445534.692	6793079.768
197	N-Methyltyramine	forward	152.1068104	228.423	3401905.37	1321172.979	101752136.8	1265532.593	1064784.365	1324401.848	1160358.245	7951500.957	7334412.708	7450019.989	7578644.55133333	1519639.42	1325225.198	1228623.283	1176381.591	1310454.038	1446969.625	826261.4244
198	"2-(3,4-Dihydroxybenzoyloxy)-4,6-dihydroxybenzoate"	forward	307.0431575	233.4455	31675386.99	44745388.54	46685916.5	29762215.47	32915462.12	80150684.81	105434189.4	34308968.03	18842735.32	52206109.43	35119270.9266667	12594222.33	11600577.2	25935483.76	14492421.67	12496967.71	10991987.2	12130068.67
199	Prostaglandin F1a	forward	379.2456529	87.3656	2714478.923	777342.803	661993.8593	1489259.177	2233525.731	970049.6842	2228568.891	7687136.593	5471787.133	4671247.214	5943390.31333333	7003845.711	6386334.124	4453161.756	7057458.518	7497564.901	6325960.016	6163162.012
200	Oxoamide	forward	193.0947375	282.4695	9091514.22	21372127.34	12196040.68	9290320.211	8687881.575	2308608.914	10958739.73	7274813.024	7367167.165	5562455.198	6734811.79566667	4077315.18	1034705.387	11155735.52	3433302.401	4331307.181	4879994.697	3946739.66
201	Diphenylamine	forward	170.0962992	122.029	7381649.494	2002112.874	7875656.509	2527596.156	3046298.107	13104488.9	3643689.724	16354690.41	16153887.91	16630420.21	16379666.1766667	79062248.14	38160326.18	52842576.85	24688631.97	6777766.936	10721255.82	29325939.28
202	4-Hydroxystachydrine	forward	160.0967811	133.449	4228564.31	4623550.233	3836870.858	4958699.831	2887630.898	39919746.54	5181689.979	17444166.3	11715575.93	12406895.14	13855545.79	3608149.819	4539616.113	5669875.374	5295333.312	19371293.33	6404928.784	2771196.462
203	"PA(22:4(7Z,10Z,13Z,16Z)/15:0)"	forward	711.5045491	156.129	712880.8628	2177839.508	3278918.594	3121652.391	1737951.701	316337.8115	1747610.737	1080173.194	1018063.598	351314.7545	816517.182166667	324460.0351	401519.1948	1403171.541	854085.3818	1107759.255	707731.6341	1564301.796
204	1-Methyladenosine	forward	282.1196895	129.184	14116894.93	27411644.37	31769011.79	6435071.012	9668307.927	30866154.12	50623296.55	14927343.48	16050824.6	15235825.53	15404664.5366667	9315819.954	4134090.984	9308787.685	6936478.6	7967403.947	5016377.596	5532005.156
205	Nandrolone	forward	275.1999859	146.063	33304446.09	41064734.24	47653605.65	57276325.83	26662115.84	44656957.18	36244653.12	85713371.33	53292578.54	54675378.67	64560442.8466667	50815988.97	48333346.84	26867637.39	73460205.26	49089544.97	119621279.2	43011526.98
206	PC(16:0/16:0)	forward	734.5704518	90.43595	6881918.514	21817508.75	9000990.084	10144830.72	3382662.916	15676031.46	9679511.704	16031042.23	10567130.93	10123111.02	12240428.06	6618231.744	5266857.719	15826683.86	8793009.401	21514162.23	15206705.86	102793104
207	Daphnoretin methyl ether	forward	367.0788969	190.451	1095507.579	1294008.607	1099169.049	1540098.05	1298128.858	577595.7974	2314146.24	1858610.932	2197326.623	1591805.243	1882580.93266667	3392452.36	1425231.947	1515558.859	2234119.584	2847684.558	1960909.347	2133492.707
208	Mesoporphyrin IX	forward	567.2964054	215.1275	6187479.11	382704.726	271108.2977	16704197.27	72594.81626	321008.407	10990351.51	5992356.75	6572763.039	6257455.629	6274191.806	298261.3912	425634.2399	136902.4291	462345.2767	951708.2283	448613.1576	332593.6692
209	3-Methyldioxyindole	forward	164.0705716	76.1985	6222121.123	1785368.718	96596221.58	3698574.402	1651724.252	3360217.903	6284883.816	12225711.22	14180528.02	15626320.89	14010853.3766667	17295634.85	25603183.71	7833435.85	10754194.79	26256651.15	19005671.9	21195512.09
210	Isomorellic acid	forward	561.2507102	223.096	1968462.645	1684415.603	1079658.135	2350803.876	25555.88428	2013862.233	3410865.557	6833885.821	7161528.124	4984995.081	6326803.00866667	4327791.052	4337474.232	6510680.048	2817704.437	4443129.264	4871104.413	5449825.622
211	Simvastatin	forward	441.2597114	426.222	110922.4551	170090.6321	6545.343449	176603.3015	50413.66191	180246.6895	150294.4825	306714.9036	298974.8482	310368.0879	305352.613233333	662335.3811	534056.7907	312479.0305	353635.2138	554814.475	456927.7603	351634.1326
212	Pyrophaeophorbide a	forward	535.2702322	45.6769	643037672.4	1144193328	649492468.8	837112913.7	725666510.9	856627817.3	592941404.3	412262418.7	413325897	459015636.5	428201317.4	12976115.25	9410298.523	5300146.81	2365704.385	15188576.12	3152285.998	8885541.034
213	Pipecolic acid	forward	130.0864801	328.007	322112766.8	730963489.5	482970153.4	510219150.7	204768110	380731967.7	222368881.4	443724622.1	483009144.2	435792313.7	454175360	401091652.4	230240998.8	503851149.7	522390238.7	558926308.9	374585835.3	214629702.3
214	Edultin	forward	387.1431554	52.8847	6654366.926	3365508.546	5229207.453	3154453.089	3394479.979	1297846.253	4161459.743	3157509.71	3841871.195	3717893.793	3572424.89933333	2832003.154	3277708.315	4504485.053	2936164.573	3727447.36	3574552.319	4186258.427
215	Baptifoline	forward	261.1597181	172.3465	4823272.765	3690527.848	3466239.353	4629015.121	2041819.045	4319996.3	1786014.928	14083998.63	15272450.69	14191433.1	14515960.8066667	2976319.872	5934103.097	7738983.891	27822454.08	9333757.87	11932254.54	21700873.52
216	Psoralidin	forward	337.1068035	205.4385	884880.0488	1285333.759	941192.7377	1276158.465	2057911.351	812126.3663	2162101.964	1926331.039	1694992.521	1550695.598	1724006.386	526032.5007	2091299.06	2259672.444	2261048.439	1156479.564	2167930.11	922511.1953
217	Methyl isopentyl disulfide	forward	151.0613259	95.2007	6833775.888	5070115.256	3281191.372	3831867.084	3292913.375	5095968.195	7178908.317	10066991.56	9814254.154	10589394.15	10156879.9546667	8794095.196	4876116.691	15276878.26	19973763.04	16384462.94	9892641.874	6875134.694
218	LysoPE(15:0/0:0)	forward	440.2769954	224.447	84253838.32	97524591.33	88630335.8	54728077.3	69386555.24	52046024.02	77945649.37	46958413.87	47310549.11	43724496.5	45997819.8266667	13472023.66	11418141.09	42208996.35	26833502.28	25895702.08	17364557.05	24851019.25
219	Rheidin A	forward	525.1157607	192.993	NA	623524.908	107922.3095	NA	328143.6275	NA	408156.7483	167204.9657	557434.2864	78312.77547	267650.675856667	710400.6368	58207.9694	482834.9988	368874.3027	511389.0781	183014.8588	296181.8861
220	Zapotin	forward	365.105666	17.091	60498.73974	116562.3915	67031.0467	84058.09597	71540.84946	52939.85993	78595.75876	92750.73138	85693.66091	44012.57736	74152.3232166667	112153.4712	58908.21956	84904.2812	347527.2336	105837.5961	88753.80325	119757.422
221	Betonicine	forward	160.096855	153.515	5036324.807	3222702.08	4954306.25	4936501.301	2864201.188	48081606.73	7221039.332	14646058.3	15923775.82	16576360.66	15715398.26	16147704.32	8383554.614	9933433.335	11111461.64	26206708.5	10618151.83	2568740.961
222	2-Diethylaminoethanol	forward	118.1228491	242.641	19863361.07	2976845.594	9832957.362	17786212.48	19659496.36	20828773.65	30071050.28	9747332.633	10341082.17	10099759.33	10062724.711	3433035.664	3555671.214	6270620.328	3479179.994	3429707.027	3940483.829	2552501.763
223	Cinnamoside	forward	519.2392726	46.0405	15669058.07	11317779.64	11353249.63	9855055.839	17346090.21	7704275.898	16149414.9	8311612.261	3441970.504	8637569.275	6797050.68	48977.34282	NA	NA	NA	NA	NA	NA
224	"PC(20:4(5Z,8Z,11Z,14Z)/14:0)"	forward	754.5344678	141.882	2430265.042	8291926.19	NA	NA	8218210	NA	6784119.816	2518698.77	1744303.111	995535.8419	1752845.90763333	96822.21058	NA	123138.7794	NA	10726267.09	958807.2623	NA
225	Astin I	forward	553.371138	254.423	441616.5976	247799.6039	75061.48091	263461.2763	312090.418	554044.8966	357080.1384	568134.7934	487865.1166	505262.7584	520420.889466667	544247.8161	606967.495	406485.2632	556425.6281	705260.2812	620693.387	483242.308
226	"PE(P-18:1(11Z)/18:2(9Z,12Z))"	forward	726.5418623	71.2178	552647.894	756431.6626	1282501.347	870318.6173	226536.6259	677510.6405	320612.2044	205961.4732	100226.9789	218474.5427	174887.664933333	48340.25016	176620.7912	636098.6851	60757.33646	NA	159356.5091	267346.035
227	Prolyl-Arginine	forward	272.1718831	469.559	4673873.324	4157727.709	2534826.499	2159349.315	5464479.296	4749229.737	3931775.434	2724165.659	2811428.438	2724667.098	2753420.39833333	1036561.925	1177815.748	2210036.711	1759439.618	923240.6866	1945506.732	979581.6156
228	Phenylalanylproline	forward	263.1390359	256.62	10522883.51	8105370.959	9293751.717	5767550.851	11735970.09	10191355.29	8514982.061	11155521.79	11462291.93	7580197.935	10066003.885	5599067.946	3979989.068	11719151.18	5832009.091	4299576.184	11660382.49	6875020.89
229	"LysoPE(0:0/20:4(5Z,8Z,11Z,14Z))"	forward	502.2913717	220.513	1832042.592	2883894.93	3020153.417	1997810.659	1867851.608	2135653.739	2101445.252	2109205.483	1914556.504	1613501.22	1879087.73566667	728879.117	5516401.757	2362587.76	1227769.347	1261696.389	710246.8658	690960.885
230	Leucyl-Isoleucine	forward	245.1858717	205.122	63248417.67	67191737.05	76651486.36	26323066.85	100137618.6	38523737.85	80344243.23	33068276.75	32679700.28	31991726.31	32579901.1133333	7570696.476	8797159.475	15981591.52	7793498.639	8965244.73	10582445.08	22261759.87
231	Alanyl-Arginine	forward	246.1637201	445.975	5321521.131	5416257.159	6290447.065	2519349.868	10901265.28	2624049.466	4299827.157	1734975.692	1755844.08	1860768.488	1783862.75333333	644616.4636	234085.8998	981199.9814	1352251.953	148189.223	630376.7177	240783.8802
232	Pubescenol	forward	585.2709118	154.195	5733530.423	8100249.345	6845218.347	7512682.514	5929393.851	4115436.151	3602999.546	2674885.895	2462513.832	2008147.339	2381849.022	60631.85948	41370.82805	NA	NA	NA	NA	50240.22313
233	"2,3-Dimethyl-2-cyclohexen-1-one"	forward	125.0961095	56.9914	9455372.313	6906534.614	7960452.139	12215640.62	7432160.579	6252065.199	10413806.09	27017989.27	24999903.75	17397019.84	23138304.2866667	24119391.09	10590191.52	18530644.51	44678773.79	24084374.92	22742212.77	21049147.22
234	Histidinal	forward	140.0817995	137.69	13204925.1	20899501.39	11801675.95	12577375.67	24756536.7	28117898.45	32096568.11	18785437.04	19541649.33	20395079.41	19574055.26	16148347.2	8072705.41	14163113.55	13683586.18	22444024.94	15359042.58	21564803.47
235	8-Isoprostaglandin E1	forward	337.2354088	63.34415	21460691.66	9914737.964	14149996.06	18840316.97	12698744.17	16286600.99	17897889.45	27417654.42	26242120.76	17652639	23770804.7266667	50452451.85	30984482.77	18783008.52	26445470.06	22668655.04	31165187.59	28620231.71
236	Glycyl-Isoleucine	forward	189.1231272	304.413	55676193.66	53951895.99	47978653.53	21098866.29	55269722.6	41874300.68	53143737.92	38738857.02	39269346.09	37055297.88	38354500.33	12811524.19	14327685.02	18625325.15	16139283.95	15450356.26	18006175.08	8436340.148
237	3-Methylcytosine	forward	126.0661988	74.51955	8584831.144	13302848.25	3835182.388	3831254.898	15440038.98	41782882.01	13724340.9	21529058.04	22136992.27	22203937.07	21956662.46	34732771.42	27311513.83	30180145.06	37114826.6	40436518.17	31665875.24	29960095.53
238	"PC(20:3(5Z,8Z,11Z)/18:2(9Z,12Z))"	forward	808.5830535	89.064	135091.3028	549292.6696	285660.3829	384976.4673	NA	NA	NA	733055.576	161446.0344	417339.1079	437280.239433333	562843.5953	130362.8507	1143037.372	517557.1325	1821357.993	434503.2423	2158882.43
239	"3b,6a-Dihydroxy-alpha-ionol 9-[apiosyl-(1->6)-glucoside]"	forward	521.2554714	58.0921	173063786.3	343318310.5	291659717.1	298701083.6	178992191.1	219237492.3	182973134.1	111900697.9	121500693.7	162387989.6	131929793.733333	2424231.621	2403808.699	2125880.881	2744280.843	2520669.167	2338958.947	2045878.254
240	L-Tyrosine	forward	182.0811238	319.657	82634347.35	110956165.2	64242015.32	48120037.33	74014153.53	84278392.41	64540163.42	72031770.26	74284677.2	71638933.32	72651793.5933333	60646418.14	4011726.711	76347044.05	38601248.22	30861706.36	84921486.82	53625440.73
241	(?¡À)-Metalaxyl	forward	280.154199	430.2475	464559.34	329244.9743	367454.9054	512803.5645	400778.8465	NA	393450.3691	818775.1173	834723.2283	689837.4396	781111.9284	1058764.435	1318576.055	1084788.566	46130.23756	1164656.651	1226021.355	749215.6883
242	Sphinganine	forward	302.3048058	90.1721	17168928.28	24237093.15	36106233.49	38686186.41	26776594.49	39929415.23	5585085.162	9419668.301	10160354.79	7234417.804	8938146.965	4499065.635	3548852.915	9121959.293	10226029.91	5536981.536	5803998.27	8306567.281
243	"5,7-dihydroxy-2-(4-hydroxy-3,5-dimethoxyphenyl)-4H-chromen-4-one"	forward	331.0813362	136.928	8265143.353	11000039.99	8071874.372	8094109.013	9580490.01	6966249.067	9704413.598	7985706.463	5955769.664	6659133.021	6866869.716	8212189.619	5286471.052	8068568.715	6485621.266	7958941.025	10328973.57	9023127.446
244	6-Hydroxy-1H-indole-3-acetamide	forward	191.0813574	70.16455	245442317.4	250492910.9	292027758.1	269265681.9	300067670.4	252770665.9	241306633.7	229040674.4	240785780.4	241671064.4	237165839.733333	168904997.4	194818291.8	170982989.2	187981852.1	196816297.7	209462604.8	222866963.3
245	"(9S,10E,12Z,15Z)-9-Hydroxy-10,12,15-octadecatrienoic acid"	forward	277.2160274	186.972	8530086.883	7445616.689	10112160.04	8501654.222	8875156.738	12030070.27	10444718.86	13808795.99	13689819.9	15325176.68	14274597.5233333	13158026.42	20538135.78	15095516.25	19827796.17	18311118.76	16807013.58	16276503.17
246	Trifolian	forward	331.0813453	193.016	5290501.078	10206764.49	6265862.292	3579452.142	8765059.007	3294190.863	5861172.123	3716768.584	4078770.031	3272137.496	3689225.37033333	2191203.094	2512603.861	2585407.518	3369263.212	2568690.219	3253033.067	2746563.669
247	Alanyl-Proline	forward	187.1074888	257.983	785795.7788	2882904.929	1430802.686	1958947.589	1162500.919	26520785.72	2549843.258	2361835.301	2124933.603	2210605.771	2232458.225	780724.6433	630329.6399	2343971.755	1597584.761	1107605.102	1160110.875	675368.9425
248	"PC(22:6(4Z,7Z,10Z,13Z,16Z,19Z)/16:0)"	forward	806.5689584	163.77	10765003.95	15226189.85	10416378	12209977.79	3036400.384	12714098.44	8855106.542	9086011.201	8310946.556	6582769.484	7993242.41366667	5632770.405	2915513.101	11312829.07	4739713.849	10046494.14	5276387.948	11437795.62
249	Stigmasterol	forward	395.3665277	30.7347	1946320.632	2590293.313	1279991.114	1866339.719	1325338.296	1829855.857	1265582.141	2905073.943	3925917.444	2468310.132	3099767.173	5428347.344	6477465.002	8682862.617	6046634.075	7974438.767	7341514.386	9150983.162
250	Glycyrrhizaisoflavone A	forward	371.1125056	61.60165	8983609.592	9942084.381	6592382.363	9018342.917	7975349.331	8819177.112	8558327.937	6966062.6	7573385.894	9714534.496	8084660.99666667	5890340.1	7698624.56	7607263.993	6067765.461	5324786.976	6499342.652	8363412.647
251	"2,12-Tetradecadiene-4,6,8,10-tetrayne"	forward	179.0848043	260.274	2409157.983	396820.1848	1075562.118	1147948.347	1037158.624	1336894.136	2944140.905	5905083.74	2861710.158	6487338.596	5084710.83133333	5221026.896	1566537.658	24526590.52	15029161.78	22258927.75	341229.1335	7875689.179
252	"2,6-diaminohexanoic acid"	forward	147.1127841	539.6695	26208198.06	69855129.36	11467421.11	11146353.31	10433815.35	43789115.51	42755198.99	28485565.9	24763422.18	22536615.75	25261867.9433333	17937252.89	5286545.457	18399499.32	11419625.65	13621057.47	24563385.05	11311631.9
253	Auraptenol	forward	278.1387604	361.659	1674107.792	2770832.079	1269921.136	726236.7006	NA	171724.7086	820204.4121	2429459.599	2477078.8	2628014.842	2511517.747	3999480.448	3325269.71	1743494.473	3246563.987	4139198.146	2873561.916	2371561.125
254	N-Methoxyspirobrassinol methyl ether	forward	297.0737153	368.387	338081.9961	318378.2362	378424.2414	293103.3133	124719.2323	461588.717	365324.1999	1052236.458	1240448.607	1495872.226	1262852.43033333	2044242.195	3251790.383	475155.6763	835266.0459	1846634.855	3146265.722	1813378.698
255	N-Carboxyacetyl-D-phenylalanine	forward	252.0864587	304.421	3860618.815	249562.4229	4397326.438	5359866.777	5050084.616	5002502.903	3664475.407	6902659.152	7766939.765	7223002.343	7297533.75333333	9370202.896	4892566.071	9417901.762	501226.2862	661012.8209	9216871.212	582435.1957
256	"PC(22:5(4Z,7Z,10Z,13Z,16Z)/16:0)"	forward	808.5841645	163.71	6197726.711	12408828.46	7643635.444	8508831.666	1353996.75	10147985.34	5454375.549	9139774.298	7516570.383	6964224.521	7873523.06733333	12710369.69	4575151.647	18673194.47	9308817.65	20448207.85	7274783.025	16459191.32
257	Tyramine	forward	138.091234	225.6625	89765411.57	4433985.798	161306238.4	3584586.555	1917565.504	54577590.21	1722610.452	12375209.64	11904328.12	11774826.79	12018121.5166667	1102484.097	2780708.297	19317629.37	2416033.759	1027128.064	1132973.853	711785.9532
258	Glycerophosphocholine	forward	258.1097601	406.229	116342503.6	186782580.2	211451167.6	122181031.4	281682382.2	79245294.47	61561110.76	46125143.12	44736833.63	43362977.78	44741651.51	5009281.845	3977003.666	56813447.3	47823687.4	12950451.99	14087788.75	7933187.603
259	3-Methyl-1-butylamine	forward	88.11252979	201.9265	70331367.84	41376320.6	24236153.22	82813888.87	34114687.12	105055412.1	63862754.16	81093798.33	80714610.23	74918899.55	78909102.7033333	43760936.51	76459351.81	49230642.49	31603305.83	61332819.95	224569726.5	134164424.3
260	Questinol	forward	301.0702317	46.02475	6423490.837	6195096.404	10875210.9	5392465.051	5707311.064	5376928.067	5755194.714	7021460.933	5944222.475	5977393.066	6314358.82466667	4324750.05	4107949.908	9358597.905	3539167.484	3821838.273	6452277.271	6075062.637
261	Anandamide	forward	348.2885417	57.3366	9247210.865	429437.8395	424993.0321	618939.1625	676747.5954	939959.1518	331994.8963	928863.0561	336595.5506	646774.18	637410.9289	408689.4586	694454.5451	325488.9016	553628.4031	354225.599	700453.4145	491163.5916
262	5-Hydroxyindoleacetaldehyde	forward	176.0706361	89.8075	4436636.708	5239559.784	2231084.655	2859767.526	3016401.094	6422372.114	5340629.193	6912223.926	7152147.942	8345785.111	7470052.32633333	11428775.17	17661404.64	6060582.915	16271623.2	13826747.15	14745957.43	10678844.38
263	"9,10-epoxyoctadecanoic acid"	forward	299.2574392	59.8458	34209229.52	37973002.59	25132957.72	21699819.06	19953892.56	26304662.54	53065309.52	18400296.15	17379840.9	20492564.13	18757567.06	21214859.61	23136508.52	23481063.61	12348549.36	16354081.88	21544356.1	34737037.79
264	m-Xylene	forward	107.0856972	49.2269	10764422.65	8517006.551	9779019.27	10114612.82	10732837.44	10336308.15	11146211.72	14471640.99	14750515.45	16189845.76	15137334.0666667	19457526.17	20902148.31	15827928.36	20843823.61	20212941.45	18792184.75	17823874.92
265	"PC(P-18:0/18:4(6Z,9Z,12Z,15Z))"	forward	766.5736005	160.41	1480051.33	3019608.034	3499513.865	3143996.157	678190.71	1728353.922	1442375.045	1056862.01	789588.9641	780910.2784	875787.084166667	1089199.984	250036.7489	1945925.703	727929.5374	915456.7764	482503.0589	425562.4246
266	"PC(20:3(5Z,8Z,11Z)/18:3(6Z,9Z,12Z))"	forward	806.567151	64.1173	606512.6582	2054813.363	402780.7694	475087.3821	49269.25029	1767089.303	199092.0067	561558.4425	198893.5947	309407.5329	356619.8567	NA	NA	530672.5482	159636.8042	486659.5648	NA	136763.7249
267	Threoninyl-Arginine	forward	276.166878	443.205	640195.008	2359057.224	1823881.986	688353.3505	2625921.343	1173513.436	2330976.962	962411.9864	954561.1116	445588.5009	787520.532966667	33977.64429	NA	228328.2216	NA	107426.6932	15764.36531	191179.5047
268	"p-Mentha-1,3,5,8-tetraene"	forward	133.1011684	49.21085	13439587.99	10638937.22	12543319.99	12578052.82	13747112.72	12889392.29	14873387.11	19815601.74	19118505.41	18811010.84	19248372.6633333	23930422.59	26220768.64	18240342.85	28481647.6	24273207.7	22776894.1	21499112.83
269	"3',4'-Di-O-methylquercetin"	forward	331.0811062	42.8852	204956063.3	253762953.3	79690117.24	250561237.1	205564506.2	211337416.1	203394840.9	208187234.9	298146331.8	219293747.2	241875771.3	304020677	214598375.1	264788663.2	237826381.1	185554473.8	312646538.3	290354414.5
270	LysoPC(P-18:1(9Z))	forward	506.3603275	207.157	3647655.595	5350103.898	6801059.736	2983481.272	6482891.417	2901377.467	4298497.088	2003536.087	589052.434	1897978.182	1496855.56766667	622521.1087	244184.9788	2613400.286	1098064.297	723443.3803	741441.275	1070086.798
271	Leucyl-Hydroxyproline	forward	245.1498165	423.256	13206218.17	10607721	10296783.89	15186615.49	11216810.99	14341050.13	11846856.13	12233938.93	18402332.77	19331299.33	16655857.01	22431166.57	23360870.37	17241521.52	290171.1464	24017433.53	1502648.545	15885563.41
272	"PC(20:3(8Z,11Z,14Z)/15:0)"	forward	770.5699759	81.01815	3385467.416	24673867.91	13801904.68	9634389.731	554936.876	12765654.05	5274772.763	4767015.275	4341189.107	3135461.573	4081221.985	2203455.999	694576.1326	6256466.107	1801080.753	5769414.555	3986206.31	8153725.648
273	Capsaicin	forward	306.20577	176.39	9099198.961	2454055.765	10625676.14	7981125.396	10160698	6715998.743	10837032.76	9513451.033	10091402.8	9479641.234	9694831.689	7458331.365	14895778.68	6375236.685	12196812.45	11952191.03	11307763.62	3783262.001
274	Millefin	forward	351.1770656	316.247	1920888.156	1138551.686	1148233.745	1667269.107	1430263.434	5280879.037	1754456.853	3462651.294	8010736.157	2188875.877	4554087.776	8439392.982	4016105.893	4710025.115	4645169.718	7701185.013	6519850.863	4130308.169
275	Auxin a	forward	329.2325481	274.7715	2909424.936	2258316.11	341492.7551	3620499.892	3186084.227	1751964.885	5555538.533	3926353.551	3839940.343	3651043.555	3805779.14966667	6143406.415	5873081.341	3099462.192	5673159.447	6277481.251	5104286.169	4097920.016
276	3-Pyridinebutanoic acid	forward	166.0863389	228.058	2881216.994	1469611.008	1993765.544	1839964.464	2149908.026	2353313.559	1662959.716	4549231.069	4705192.954	4475225.311	4576549.778	6476748.536	6019313.52	4517643.266	7115407.06	6277082.517	6446176.825	3853248.704
277	"2,3-Dihydro-5-(3-hydroxypropanoyl)-1H-pyrrolizine"	forward	180.1018834	43.73475	7239137.215	2466467.433	10278774.44	4557859.674	2889223.615	8387992.733	3040001.104	4481873.47	4160517.958	3569364.631	4070585.353	4007912.779	4420982.94	3315822.13	4269717.699	3697763.2	4782715.514	3042487.749
278	"N-[(4E,8E)-1,3-dihydroxyoctadeca-4,8-dien-2-yl]hexadecanamide"	forward	536.5034524	217.247	1448300.644	3703416.311	846501.0604	2485521.392	893378.9707	2094120.769	2365048.602	186435.0692	NA	455109.3586	213848.1426	348253.908	189206.6154	799823.6414	788590.3953	196885.0625	689989.0936	892492.3197
279	N-Methylcalystegine B2	forward	190.1072223	409.5495	8728349.16	59339661.2	42074291.06	9789953.786	18934294.93	4133876.661	5664823.268	13148712.3	15975834.46	12564509.76	13896352.1733333	9257350.39	4135212.942	12348284.15	4473476.22	4750446.756	9110187.566	6700545.567
280	LysoPE(16:0/0:0)	forward	454.2912897	329.118	335101.3994	678922.5791	500033.9035	1026558.588	442392.866	799291.5538	919388.7715	1046955.703	1044086.81	1744013.988	1278352.167	1607850.765	2083362.523	2131145.193	2036773.154	1271773.227	1735539.631	1846723.404
281	4-Aminobutyraldehyde	forward	88.07610905	675.3775	2070005.928	2676352.649	2599371.113	2923592.885	2948220.53	3618867.908	818123.469	4410314.136	3204427.691	4080639.288	3898460.37166667	2894450.339	2292930.528	2943303.725	2897638.28	2350482.758	2250414.539	2612514.035
282	"2,4-Toluenediamine"	forward	123.0916253	52.9383	79545115.82	68169349.36	41293284.73	49913098.91	14542865.53	91133918.71	85743962.49	56956617.18	57069770.21	57377971.74	57134786.3766667	14423021.73	15009108.8	13773815.13	16681002.21	15042932.56	6316029.992	12347919.46
283	L-4-Hydroxyglutamate semialdehyde	forward	148.0605456	444.016	3229302.082	4085745.54	2534723.829	1948712.612	1830203.408	3223651.544	2135722.709	2374445.421	2257107.776	2163690.143	2265081.11333333	1575797.208	914678.4691	2794279.717	1662550.219	12775823.32	1648455.632	1643355.45
284	Homoarecoline	forward	170.1173908	54.1007	4831212.828	3387054.791	4282044.427	3656328.045	3883132.069	4671326.11	4362286.942	5081014.26	4385748.896	6046295.22	5171019.45866667	6605428.495	7578770.651	5139044.816	7281341.082	7479803.559	7367101.908	4888931.296
285	4-Trimethylammoniobutanoic acid	forward	146.1175588	53.2388	1622837.56	1831394.527	10954798.21	2746950.49	3135868.439	25208634.3	1891248.131	15717092.37	2174560.441	2385197.862	6758950.22433333	3824999.749	7107403.438	3069948.943	4659349.437	5475960.942	4379098.418	2473980.821
286	"2,3-Dehydrosilychristin"	forward	481.1131647	45.18475	2514071.777	2324116.961	1035507.164	3592896.116	3923915.386	3008958.213	3134139.027	2089736.684	2287339.038	2276034.557	2217703.42633333	1627843.112	1899211.435	124481.582	2252427.411	1625819.685	2539175.596	1376769.371
287	1-(1-Pyrrolidinyl)-2-butanone	forward	142.1225036	44.1134	1985708.018	1496243.522	1804255.62	2296701.561	2279329.243	1931326.792	1709470.231	4154372.549	3592906.729	3208985.511	3652088.263	7417720.096	5639881.424	4406645.826	4210323.983	4611299.597	5300929.225	5931707.107
288	"1,2-Dihydro-1,1,6-trimethylnaphthalene"	forward	173.1324004	32.9668	21515762.79	21193111.77	21661407.2	20995589.43	22112439.24	20327698.37	20225789.42	23454513.76	27470204.44	35469757.94	28798158.7133333	34172376.81	28555902.7	25783555.59	33679049.73	26248346.11	26429789.79	28549113.24
289	Artonin K	forward	383.1113547	47.8098	8145144.494	4341157.185	6828485.95	6154199.721	9512183.488	7254595.076	10472712.37	7785048.627	6407990.077	7494230.565	7229089.75633333	7754409.565	7137580.6	9650016.192	3035336.678	5846254.512	4980337.562	14878432.4
290	apo-[3-methylcrotonoyl-CoA:carbon-dioxide ligase (ADP-forming)]	forward	174.1238467	330.119	34145453.95	6088866.347	49711643.4	40796316.09	70087500.25	59606459.6	33464378.35	42367084.98	42953295.41	45714785.75	43678388.7133333	19833549.69	10524348.98	79075651.12	48303094.84	36038050.1	42205204.12	8206944.527
291	Leucyl-phenylalanine	forward	279.1702325	197.51	32314834.88	19606701.32	33057504.05	13656725.36	48002649.57	16012878.91	22715630.61	14336967.1	13705857.56	13407432.75	13816752.47	2035986.435	4577425.885	7607138.387	3797535.364	4216642.8	4236952.481	3715601.95
292	"5,7-Dihydroxy-8,4'-dimethoxyisoflavone"	forward	331.0815525	155.982	10508015.97	14628684.83	8324836.447	9115967.033	6694367.225	9430366.076	11310839.87	10242385.21	7270103.772	9874737.493	9129075.49166667	9167557.901	7493023.785	8486135.905	8164316.263	10795737.61	8973131.61	9506290.426
293	28-Norcyclomusalenone	forward	411.3624576	30.85075	5508641.263	6905182.413	283200.6728	5341599.312	5756209.121	5630896.975	5199426.28	4498752.402	8330721.885	6692672.346	6507382.211	9495285.392	10259265.44	9696552.97	9395609.548	9176209.618	10249554.01	11813667.65
294	Erythrodiol 3-decanoate	forward	597.5315199	168.942	NA	3878702.853	NA	680447.8657	1392148.165	7850123.482	1366191.292	7437290.683	8977031.491	8204401.233	8206241.13566667	28649588.09	93565.99955	2820919.723	11691453.67	4999253.753	51127323.27	4519711.197
295	Enkephalin L	forward	556.2795552	218.1315	5717018.704	8154924.89	7199399.306	17314482.21	2703538.64	16771641.7	6502727.478	3884676.75	2005276.841	6824798.246	4238250.61233333	148598.5456	453632.2945	2290637.037	1505730.862	875051.4984	756740.1375	656213.5167
296	Sterebin A	forward	311.2210493	276.14	2925245.417	NA	NA	1604166.288	303608.9136	1822892.285	6077316.367	4480153.766	3357783.853	4077343.425	3971760.348	6869976.208	6915693.743	3067376.55	5871125.321	7330003.382	5834832.216	4361790.533
297	6-Pentyl-2H-pyran-2-one	forward	167.106386	47.6346	4443975.915	6589809.872	5290370.439	6621665.134	6544231.462	4374935.582	1810195.85	15658369.35	21083602.62	13011787.09	16584586.3533333	17486968.72	19168506.65	13690006	19930757.08	17978263.17	15597558.62	13962237.53
298	"PA(22:6(4Z,7Z,10Z,13Z,16Z,19Z)/22:4(7Z,10Z,13Z,16Z))"	forward	797.5263647	165.4665	385071.1193	236590.5403	330521.5725	297853.1905	NA	2565452.185	161118.4125	384578.3169	380043.7011	1467666.229	744096.082333333	434146.9826	948104.9837	354747.3638	627454.862	653591.4984	931922.7407	NA
299	"(3xi,6xi)-Cyclo(alanylvalyl)"	forward	171.1126198	283.124	559144367.2	767227495.2	466887540.5	385242016.4	537005888	172353396.7	505492402.9	307733213.2	302063535.1	303684307.1	304493685.133333	163579370.4	145816166.2	417540258.9	211772952.6	193590203.8	267845021.9	174385305.1
300	Sesamolinol	forward	373.1282748	204.124	1212820.603	1090205.426	1356783.191	1246611.506	2587548.342	1008945.724	2043396.463	1769478.411	1753414.293	1729999.801	1750964.16833333	1123720.798	1632176.63	1871417.277	1867329.522	1861425.245	1590634.525	1092853.451
301	Spermidine	forward	146.1650681	585.5355	38380178.67	37777376.33	36957971.04	44555617.45	50118976.78	40688821.37	40340098.63	33979208.42	39662866.65	41789504.11	38477193.06	36061778.64	34198393.34	40714453.52	41680046.62	42434716.5	39753779.18	16570199.26
302	Glycyrrhetinic acid	forward	471.3462662	60.9415	11742331.42	4372890.983	7956053.582	9930275.489	8240607.596	6758132.466	7293001.204	9158238.678	9516528.669	10154364.87	9609710.739	8595306.589	9761082.573	2997482.13	10355718.49	8165804.347	9900628.373	8227273.783
303	PC(15:0/16:0)	forward	720.5553337	169.247	68945726.59	124953494.9	89644270.78	57757563.81	29283437.24	98993365.55	84027748.68	69309930.56	73040750.87	72609773.83	71653485.0866667	93953090.42	52619675.64	126403979.7	87177537.69	157230087.5	119241523.6	232394720.7
304	C.I. Pigment Red 149	forward	599.200996	154.446	9912794.45	15498890.18	8652372.829	8910258.633	16002515.28	11501651.41	10591263.18	6591574.47	7109559.849	6517644.265	6739592.86133333	1894713.302	1347761.892	957368.7061	247135.2687	171539.7479	1334874.347	378613.2678
305	Lactosylceramide (d18:1/12:0)	forward	806.5675442	89.9708	458195.3751	701984.8157	397174.431	327271.3931	NA	NA	752038.7405	749889.3876	NA	136070.6952	295320.0276	324379.3295	NA	425741.9647	229027.8014	664118.4818	344086.0415	1866880.552
306	Prudomestin	forward	331.0812997	107.3395	5808744.358	7342610.222	5266885.698	6007216.947	11771473.82	5014490.056	6532827.106	5689237.208	5830030.056	5656370.479	5725212.581	6530463.503	4248702.067	6770296.633	5052142.539	8401840.653	6547516.2	7212625.471
307	"1,2,3,4,Tetrahydro-1,5,7-trimethylnapthalene"	forward	175.1479055	32.4883	25336933.41	26883862.94	25720817.23	28633016.33	26704872.69	24952578.31	26303929.59	25851900.36	24927290.41	25144041.72	25307744.1633333	20237142.72	30389578.59	26400853.87	20659649.93	23873948.45	20518586.61	29127235.13
308	Pandamarilactonine A	forward	318.1697602	176.672	2462378.867	2696213.24	2566440.166	2671533.967	2627818.128	1743964.808	2332873.3	1925038.603	2684701.694	2493770.419	2367836.90533333	2478858.716	3821044.481	1622601.367	2361831.45	2010956.626	2532064.161	2453301.361
309	"1-Isopropyl-2,3-dimethylcyclopentane"	forward	285.1807104	414.71	294794.6851	1378959.038	1216150.925	1809691.918	1373252.763	512514.1982	110522.3906	2788827.544	3047823.74	467712.516	2101454.6	743225.9834	601540.003	602113.0705	NA	741699.9924	1324878.216	2639546.88
310	ar-Artemisene	forward	271.2413844	30.8634	8108695.772	8231480.172	1426389.217	8409458.326	8415937.619	8217839.62	10383234.32	4967700.018	6441098.398	4853564.894	5420787.77	3584237.911	3943391.178	5668683.296	4707650.246	4035406.335	4385507.652	5825250.945
311	Fagomine	forward	148.0968439	317.1	9362070.159	4316633.171	9103985.479	15099142.25	6863746.164	17852653.82	6293236.505	12211113.15	12643365.49	11908522.47	12254333.7033333	48431656.32	16868739.79	4654961.824	1870478.486	8113304.851	6305052.449	3604469.357
312	2-Ethylacrylic acid	forward	101.0599769	405.6505	32506811.4	31839753.91	24611504.9	28433568.57	20463424.6	52242827.58	23787492.06	38657063.35	37313798.51	36034877.48	37335246.4466667	34078328.66	26520618.66	43549311.21	33009511.82	30887208.98	34988948.38	25369515.23
313	"PC(18:3(6Z,9Z,12Z)/18:3(6Z,9Z,12Z))"	forward	778.53526	166.346	20306603.12	18983356.97	18383277.45	19332262.22	5656046.309	19448035.99	9082351.952	15111234.41	12628658.21	10339151.57	12693014.73	3851601.445	2635953.637	5371971.275	4378926.318	3826321.358	6907797.996	6199448.741
314	"PE(22:5(4Z,7Z,10Z,13Z,16Z)/14:0)"	forward	738.5036404	170.617	5731454.103	409413.624	5279259.029	2987965.586	1865072.444	5374546.495	4079664.137	3361774.47	3127890.892	2496623.854	2995429.73866667	2767836.034	1881007.53	4920816.139	1763471.37	3686188.741	2023716.618	3245628.145
315	"PC(18:3(9Z,12Z,15Z)/14:0)"	forward	728.5209699	145.011	1199656.946	1760119.919	1345803.012	1569930.058	1947151.66	1366095.366	6304792.064	971991.4236	1188786.724	695484.8206	952087.656066667	160037.1781	105766.6319	1072162.666	120157.6196	584279.513	610692.9266	1125135.167
316	Cohibin C	forward	577.5185215	114.488	596088.4646	1837139.034	961491.482	833531.6415	760113.6324	1565418.164	1228970.876	669160.556	615744.2424	567317.552	617407.450133333	797351.0012	330896.1561	1641635.24	861231.9302	1224486.754	1048484.45	937223.088
317	Bisdemethoxycurcumin	forward	309.1094306	331.534	104435.651	165157.258	526465.6522	1451763.01	387175.2988	876096.8181	1213761.844	1469324.095	1259462.764	1589536.265	1439441.04133333	889650.7039	863055.4636	323229.5482	1714183.43	1396765.021	1361086.952	381993.2223
318	3-Amino-2-piperidone	forward	115.0866948	296.918	33877720.66	26159576.85	45375159.26	40326012.31	13215748.34	9932396.846	37157794.44	21070516.42	19910363.42	21436727.76	20805869.2	11326776.41	19437047.73	23543498.37	16338170.89	23125514.36	14899492.28	12990193.9
319	N-Acetyldopamine	forward	196.0970013	310.3485	1507098.383	587567.1527	739523.3972	1045518.249	5656526.611	15077173.44	2244847.097	3710727.187	3691022.182	3758611.162	3720120.177	4136749.509	3715211.952	2284766.84	4383403.43	4073893.33	3103046.849	1888891.257
320	Licofuranone	forward	357.1313539	368.555	253212.3966	238715.6817	36657.84044	218138.9516	142835.1697	158776.0628	300925.5296	427026.9111	715158.5965	944059.9989	695415.168833333	2109158.019	1266014.079	1394911.67	1884640.784	2797706.116	3551444.253	1778583.494
321	(R)-Cryptone	forward	139.1117108	36.53605	9284294.435	5810558.164	4773322.819	4437749.098	9409492.927	8765624.87	10232576.17	3014371.537	7503592.988	10210503.73	6909489.41833333	15516330.29	12686687.89	4447010.929	10872590.59	11101858.64	11228199.76	12411496.85
322	Montecristin	forward	575.5032355	218.1315	1548997.594	1350727.864	2188644.73	1562100.099	543535.6988	3865485.798	1136662.061	1814754.297	1774886.181	1930190.58	1839943.686	5586254.742	2584021.241	4171622.46	3790191.884	5152068.439	4601558.311	5028911.608
323	Dieporeticenin	forward	573.48787	218.644	2780893.787	4112537.479	3542344.043	2984114.61	703812.3103	5590983.041	2916091.166	2247926.042	2103537.339	2228895.59	2193452.99033333	3271345.586	2043622.579	4197863.363	2342851.747	3099084.978	4716669.423	5843004.272
324	Parasiloxanthin	forward	571.4578319	185.252	NA	878253.78	303010.8192	NA	10424868.54	NA	2615913.995	4484830.759	4726488.744	3640939.497	4284086.33333333	2895953.858	2639104.378	10672126.07	14971297.63	5392456.552	1056141.978	6128148.767
325	Faradiol laurate	forward	625.561514	163.87	134886.6317	3491760.315	NA	126626.7431	430174.1594	1113913.988	674786.6913	2721771.541	2406018.362	3188924.369	2772238.09066667	5294506.284	NA	643664.4161	3043041.411	373590.6471	14607765.36	1602721.366
326	Cohibin B	forward	577.5182304	217.377	181481.2647	296162.8758	255870.9948	NA	NA	783415.9578	366182.4003	158720.6362	435883.1689	464516.6872	353040.1641	2442521.138	905626.5487	1184904.205	1498765.876	2587966.28	2137928.776	1753079.435
327	Withaperuvin B	forward	521.2714101	458.817	1160505.444	NA	914199.2067	54109.50489	NA	2095966.482	857160.68	1048196.817	896006.8656	997444.2048	980549.2958	20950.02283	NA	6524.561049	1009983.071	NA	7264.420726	NA
328	2-Acetylpyrrolidine	forward	114.0914281	46.9225	29961498.47	21733647.43	19222608.86	22580142.72	22956235.8	19812271.43	21550174.92	23131913.88	23884490.34	25051039.15	24022481.1233333	24131384.62	27989369.87	18892249.02	24925169.45	26660643.36	21841453.36	18535400.86
329	Justisolin	forward	371.1122354	47.7539	4115427.665	4231564.945	3129040.562	4752197.793	3333127.441	3696294.302	3572622.691	3536837.536	3962792.129	1909709.265	3136446.31	3495121.954	3614923.565	4671837.046	3030374.768	2977589.848	3489075.918	5095733.063
330	Pyroglutamic acid	forward	130.0498049	268.971	5835273.307	9094243.787	11063526.33	10111912.27	8642694.321	2281233.649	8938802.763	6119462.465	NA	7157904.899	4425789.12133333	629224.4272	2729567.068	6494555.671	8962020.693	NA	5081543.014	719695.8773
331	Prostaglandin E1	forward	337.2367907	37.7943	6550874.107	5765012.341	4556150.172	7254059.973	7883435.245	10649390.58	16953310.71	10955590.84	11619031.95	10969932.87	11181518.5533333	14662129.71	15924404.65	10622180.91	28447106.45	16285018.23	14447173.29	28137823.06
332	1-eicosanoyl-glycero-3-phosphate	forward	467.3152495	36.62895	1597467.24	1528014.052	626558.4596	1080144.801	1164649.531	1228737.393	672857.3504	732174.4987	2190905.655	2114472.136	1679184.09656667	2011037.032	2379664.622	2821131.711	2759105.977	2288420.665	2424376.189	2377146.159
333	2-Ethoxy-3-methylpyrazine	forward	139.0864435	18.6293	2271094.895	1839233.404	2280461.161	3063011.816	1773332.657	3405565.836	2725790.034	5534102.524	1585794.572	3386762.905	3502220.00033333	1752876.034	2929732.017	2243172.96	3207668.129	2201970.899	2755860.893	1944363.616
334	Garciduol B	forward	503.0962993	53.0384	469113.0048	251443.7288	117377.7878	629232.0946	362930.6541	100182.9949	432462.9759	420849.3143	284223.6707	449990.7485	385021.2445	374150.5209	341611.7752	442270.2891	356827.9085	338229.8077	381567.3879	570321.2284
335	N-(3-Methylbutyl)acetamide	forward	130.1226841	266.485	2281697.171	3818233.143	958759.4694	2601499.988	9632422.672	3613769.595	1509570.335	4734107.22	8591254.407	3469546.826	5598302.81766667	8984064.823	3533980.267	14678216.08	7219718.469	10147691.75	7495640.582	4176540.659
336	Diethylcarbamazine N-oxide	forward	216.1704873	360.451	6811741.466	8485789.536	3648758.455	5122618.562	1152836.147	3334036.978	8870922.529	8593711.969	8120925.899	8359796.747	8358144.87166667	6316319.293	4851304.673	4560407.759	3963559.959	5271445.239	5614923.627	11680008.78
337	"1-Methyl-1,3-cyclohexadiene"	forward	95.08583311	48.425	13929571.58	11414769.11	13419968.17	14774957.87	11441347.5	10743333.47	15787231.53	17587741.71	18847507.55	18564566.04	18333271.7666667	22234251.07	22270328.53	17972761.98	24728750.83	22333016.36	23475871.21	21667864.82
338	"PE(P-18:1(11Z)/18:4(6Z,9Z,12Z,15Z))"	forward	722.5090713	185.249	727965.679	981757.2147	954751.2335	456940.8151	398381.4988	1541705.391	214248.9824	555734.895	893738.5986	332912.3458	594128.613133333	1151832.324	425979.7888	1622056.917	656608.2231	1355677.296	714965.8308	652605.3217
339	Ubiquinone-4	forward	455.3162446	56.72075	740979.2981	1464547.543	1124884.262	1723440.682	905486.1001	817742.3991	1506594.611	2762737.461	2265737.97	2126193.109	2384889.51333333	2847927.604	4656670.212	1380742.333	3203226.799	2354905.926	2870175.018	1435731.219
340	Ginkgotoxin	forward	184.0969554	102.966	30818850.86	20494308.96	19864924.93	33635177.38	33907583.84	21814409.77	30996690.75	26870742.99	30721316.23	28899137.22	28830398.8133333	21466079.98	20607157.76	12526302.58	29961783.48	24510285.96	24657363.71	16873662.7
341	Comosin	forward	375.1077431	309.6845	579922.9287	564722.5283	536239.1301	870065.2809	830643.894	519278.9845	1194160.923	1209301.244	1431338.129	1216771.972	1285803.78166667	1865363.045	2049843.455	1454135.451	2043490.272	2145179.58	1688450.536	90365.16128
342	D-1-Amino-2-pyrrolidinecarboxylic acid	forward	131.0814976	327.492	758078271.2	919669686.6	986631302.8	777817305.2	1501658614	620769438.6	1018252813	708337927.3	694378931	687724863.5	696813907.266667	269964434.1	300854804.2	722353369.3	681821140.7	404304418.8	510468355.3	338546730.5
343	Thymoquinone	forward	165.0908884	35.9149	12921727.61	19484772.76	19696000.17	12437233.01	24144377.27	19214517.83	27598626.53	21263267.25	14982855.47	18050044.04	18098722.2533333	16804025.57	11282490.35	16379431.63	18099100.88	18303539.1	27477371.35	16394327.41
344	"PE(16:0/20:4(5Z,8Z,11Z,14Z))"	forward	740.5197488	142.374	1362570.126	7001933.591	3357526.037	2644490.473	4435089.959	344788.2432	4574899.839	1459657.528	990162.5351	381292.2689	943704.110666667	259755.3271	NA	144523.0777	NA	6331135.335	677677.4896	62016.74451
345	"PE(18:3(6Z,9Z,12Z)/15:0)"	forward	700.4899678	172.7775	13407725.54	14215497.6	12849769	7908368.31	4577617.081	10027419.45	13353430.75	7931470.03	7681718.198	6385183.733	7332790.65366667	5903526.411	5453266.306	7799615.376	3179274.969	6093622.89	5218559.796	8473783.347
346	Nb-Tricosanoyltryptamine	forward	497.4428383	282.032	NA	373529.2261	NA	NA	195027.5707	NA	50003.8279	620278.2611	617552.155	642617.6428	626816.019633333	205651.0971	NA	826555.5206	631608.25	434377.9127	5038992.725	426680.5604
347	Prostaglandin E2	forward	335.2200239	37.13165	27148439.33	20750759.9	15647032.31	18560386.03	19858645.06	19300545.74	19468435.58	19688131.51	19628505.33	17427369.9	18914668.9133333	8307275.06	3822788.272	8695328.253	16132878.6	11405119.93	6850924.676	12385708.72
348	1-[(5-Amino-5-carboxypentyl)amino]-1-deoxyfructose	forward	309.1672766	315.251	15286876.14	8878355.266	9164252.852	12324586.27	12770786.53	8099379.43	14687849.9	24306041.25	29385898.97	17286202.34	23659380.8533333	42315217.33	28742782.68	24795070.88	31126548.95	35264605.95	27954156.99	30997068.39
349	ent-16-Kauren-19-ol acetate	forward	331.2623548	33.2682	20988745.7	20157596.51	13672179.55	9261876.029	10564834.07	8592271.73	15875533.32	7445624.171	14681163.48	9907644.466	10678144.039	9507794.197	11937688.96	12324079.75	7941380.876	10877076.1	10576691.08	11649388.14
350	Physangulide	forward	523.2897764	226.771	751152.1901	849359.0352	1273352.017	1250478.336	877229.3845	292189.5548	526187.736	336928.5378	150468.7573	351168.9878	279522.0943	386114.9139	297918.5312	210506.3495	321282.6766	440277.4563	309127.8036	316892.624
351	o-Ethyltoluene	forward	121.1013049	50.10095	10988800.63	10064434.6	10359493.68	11944292.53	10935220.04	9284640.418	12694294.07	15281489.92	15284489.72	15803069.3	15456349.6466667	19800215.14	21903239.51	14460825.21	22663906.52	21233444.59	19677189.94	18001857.07
352	Perillyl aldehyde	forward	151.1115474	35.1428	11461666.68	11960683.45	10808805.67	10932435.68	12908128.7	9495399.131	12381768.97	20110628.09	19817413.02	19777091.19	19901710.7666667	22941722.42	27810820.68	20430605.33	21560024.5	25965294.61	24631389.73	23055014.95
353	L-Dopa	forward	198.0758745	207.366	3123937.589	3268102.774	1259124.419	3069648.438	1443049.197	3862722.646	3508061.411	3315163.74	217750.8235	2760130.651	2097681.73816667	329608.759	1562149.693	262053.902	3133417.115	390764.953	2866993.977	302210.4274
354	2-(1-Pentenyl)furan	forward	137.0960535	36.8621	5750177.121	10101796.39	11347166.34	10076884.71	5631195.404	12985036.88	10901372.35	12413821.75	7960104.367	9692205.251	10022043.7893333	9867754.354	15763265.61	12650117.33	13369057.9	15345259.87	14712384.06	10147310.35
355	Methylimidazoleacetic acid	forward	141.0698388	32.36635	4188754.566	4380048.569	3730955.447	4679389.45	4562710.029	3706457.935	3222376.208	3096600.55	3596163.448	2844350.498	3179038.16533333	2296201.103	2409516.562	3283508.458	16552060.78	2774881.685	2446499.622	2833285.984
356	Pyridoxamine	forward	169.0970429	260.642	2501111.074	6099695.667	1563222.475	1939757.962	3432884.889	12697199.49	5916140.02	5279076.11	8478024.61	4913779.24	6223626.65333333	3729423.654	2616373.701	8281602.848	1194920.47	4316420.364	3671140.596	3977473.267
357	2-Methyl-3-(2-pentenyl)-2-cyclopenten-1-one	forward	165.1274791	70.76375	4038341.174	1341169.116	3223543.666	4590414.016	4607503.66	8583964.693	8314448.394	8180424.666	8666781.398	9025794.527	8624333.53033333	11773830.29	14101094.14	5497385.013	12249988.35	10474199.78	9129576.434	8354344.96
358	Sciadonic acid	forward	307.2626594	57.8614	17240907.96	8614062.444	7983358.904	15938936	10660201.71	9733597.142	25854605.1	20726482.21	22641951.12	25155991.09	22841474.8066667	26866180.81	46406688.46	13529699.04	26262918.27	27927578.76	30021842.89	32069663.9
359	DL-2-Aminooctanoic acid	forward	160.133325	404.359	138518870.4	90000062.69	65484035.64	45369152.41	75826825.9	96556062.93	74418862.11	77299998.83	76143889.86	76785620.89	76743169.86	72655258.13	34466166.68	111997435.1	34583910.54	74284129.11	62093000.43	59113882.25
360	4-Acetamidobutanoic acid	forward	146.0812022	107.997	33149028.82	998747.293	30366244.14	257101.3188	2552837.093	1172883805	1312331.832	200238976.1	213384240.7	215264851.9	209629356.233333	6232544.623	6762538.59	3318045.888	8800414.594	5728625.423	4865155.461	1048492.8
361	3-[(3-Methylbutyl)nitrosoamino]-2-butanone	forward	187.1438802	244.343	69673385.73	8464507.903	37243943.78	5897967.192	4064848.758	90079167.26	11178338.31	20086433.56	20615448.75	19806198.11	20169360.14	1899961.962	5293974.745	16023941.15	11593631.21	3906162.35	8943175.459	3141757.747
362	"p-Mentha-1,8-dien-7-ol"	forward	135.1166363	47.809	11018779.76	8587747.885	10456573.72	10916118.94	11054502.17	9835818.334	11810637.95	14645880.33	14937360.85	16233453.9	15272231.6933333	15633978.83	20306990.96	14054844.75	18600602.96	18183145.6	17333680.36	16003966.46
363	N1-Methyl-2-pyridone-5-carboxamide	forward	153.065805	156.007	13017224.94	13366942.43	12987911.58	12143860.27	12447218.91	10409532.49	13599559.32	11227549.34	14036847.17	20811106.54	15358501.0166667	13943672.72	13635027.45	12288665.38	13021799.56	14261047.94	15424668.99	14698858.19
364	"(9R,10S,12Z)-9,10-Dihydroxy-8-oxo-12-octadecenoic acid"	forward	329.2324234	244.149	3576458.931	2208761.035	3070840.042	2685155.825	2724927.486	2419905.566	1003940.728	3454237.283	3700944.46	5559623.801	4238268.51466667	4449021.96	4556613.331	3067915.326	4905470.224	4725801.494	4206700.283	3430826.216
365	Debrisoquine	forward	176.1183438	70.5457	22918963.5	98126516.78	21908248.94	5556641.163	6017286.07	53586596.1	67201422.7	124836761.8	123156600.4	114530202.9	120841188.366667	175371378	14640634.53	95821450.27	128266169.4	188614341.7	129894683.2	143656664
366	Tyrosyl-Isoleucine	forward	295.1517453	229.263	16607045.03	1537857.478	1030751.255	1789160.515	1126932.612	5974435.233	9768470.458	2074489.7	4497386.069	5838532.329	4136802.69933333	3729552.427	2638213.804	2393497.27	3327874.597	3657139.211	2034845.658	2519636.431
367	LysoPC(P-16:0)	forward	480.344158	209.2345	10200083.8	26167619.2	27597757.5	22626697.82	24838707.47	20644697.09	14448310.48	10904598.44	11352275.49	11546676.37	11267850.1	5352000.061	2395036.034	20187481.64	11848632.21	6091272.604	5785546.684	11504892.7
368	3-Hydroxy-carbofuran	forward	238.1075397	423.9945	1314508.219	921352.4007	305296.5633	1306863.49	1164155.008	851759.9352	1243644.202	2401715.884	2263727.077	2482333.866	2382592.27566667	2687357.869	136122.9475	2530503.238	128727.9277	3393248.891	202692.2027	2034273.99
369	PA(15:0/20:0)	forward	691.5274986	34.81575	2485620.724	4028128.943	723855.3588	2790948.866	3402189.206	469036.2903	2868485.691	593990.737	3063681.703	3144326.099	2267332.84633333	3116356.537	3803796.355	4382312.873	2718527.738	2573880.691	3379461.805	5368555.516
370	Muricatacin	forward	285.242042	59.852	20721112.2	34669810.92	4622446.359	7053696.647	8558948.089	13834847.74	44004417.08	8806580.77	9202458.574	9569797.735	9192945.693	4647828.904	6627776.238	8605331.29	4941719.621	5591376.139	5840241.343	11321929.15
371	"5,6-Dihydro-5,6-dihydroxy-y,y-carotene"	forward	573.4726924	182.6785	624928.3908	2820398.083	1448335.623	419262.0257	23292319.47	1779293.795	7577873.035	6023303.579	6929275.702	5234632.129	6062403.80333333	4378416.612	7332588.14	15163889.64	11297548.62	1254567.813	2276329.594	9257835.937
372	"Dihydro-2,4,6-tris(2-methylpropyl)-4h-1,3,5-dithiazine"	forward	290.1959439	324.96	957448.0882	3348441.015	3235035.644	6142368.869	3910520.346	3901294.345	8769055.304	9391027.754	9806009.624	9234250.472	9477095.95	14516509.67	15022994.52	7508027.095	14886046.9	14340618.97	15131165.99	9780752.625
373	PE(P-16:0/16:1(9Z))	forward	674.5123099	82.3114	6549041.004	6460457	6340787.263	3816672.063	6349502.295	6093319.285	25053304.35	3402431.959	3415105.65	3266534.779	3361357.46266667	1203383.311	1157779.399	4259581.445	1958113.325	2963935.432	3114705.14	1586906.553
374	"MG(24:6(6Z,9Z,12Z,15Z,18Z,21Z)/0:0/0:0)"	forward	431.3160316	51.4675	11376787.16	9899613.789	11045831.94	13288556.15	9806313.177	11994075.2	12972194.02	9771823.314	9233046.055	10894204.72	9966358.02966667	7702440.108	8396907.352	2253944.887	7928063.178	8379259.454	6737449.115	6703045.259
375	3-Methylhistidine	forward	170.0925275	151.753	22808960.74	9564031.073	15325200.87	14423315.26	16370274.59	14988997.2	16468730.16	14822061.78	16559807.37	16234411.51	15872093.5533333	13465711.33	14951610.68	11176990.85	14936829.82	14288820.19	14845503.36	10984822.55
376	PE(16:0/14:0)	forward	664.4909648	174.9095	75630796.03	91576761.95	77262915.68	61592383.49	32041193.83	82520219.63	104361193.2	53430025.94	59840964.27	57142080.44	56804356.8833333	72103970.11	52481517.54	67560029.78	49904103.32	82613146.23	64317998.74	98043230.29
377	Colupone	forward	469.3306914	47.8306	3604309.78	4158415.328	3053831.725	3543214.887	3404361.995	3912630.084	3691241.169	4955573.79	4794627.703	3802596.238	4517599.24366667	5161876.486	5934332.275	5137017.785	5951088.731	4784090.516	4961297.735	5225418.926
378	4-Methoxybenzyl propanoate	forward	195.1006395	403.8865	7999642.605	8620824.373	11907418.29	9242395.651	18239067.55	5145881.363	6842143.539	6311043.049	5993247.289	6246020.715	6183437.01766667	2512475.983	128521.5191	6556340.978	6339141.787	3115589.949	1800611.835	3029790.47
379	Harderoporphyrin	forward	609.2708322	62.3744	7628432.154	7618617.681	9416621.573	8946284.443	10955296.31	6483413.577	7038638.597	3347578.956	3531240.16	4139721.1	3672846.73866667	NA	NA	NA	NA	NA	NA	NA
380	"11a,12a-Epoxy-3b-hydroxy-28,13-oleananolide 3-acetate"	forward	513.356524	47.8098	1352795.093	1511216.78	2212589.541	1309959.799	901172.0414	1439005.443	2387210.991	2288478.352	2128504.93	1568363.126	1995115.46933333	1684860.967	2032419.693	1315263.082	1624174.551	1354570.436	1501312.58	3176596.575
381	Panaquinquecol 1	forward	293.2106665	274.961	6280378.212	4786739.868	7048519.473	8062854.322	7191950.883	4198222.205	11130082.83	8936933.655	9338713.62	9003522.677	9093056.65066667	13673751.67	13194566.95	6716457.96	12780326.37	15105283.31	12336340.96	9240058.479
382	"(1(10)E,4a,5E)-1(10),5-Germacradiene-12-acetoxy-4,11-diol"	forward	297.2057294	273.423	1005842.359	645498.528	888912.5409	1348151.308	879854.1763	699453.4538	1236933.011	1729710.922	1845326.009	1859629.91	1811555.61366667	2550358.699	3023376.805	1675260.629	240716.156	3590679.32	552790.0888	944601.4264
383	PE(P-16:0e/16:0)	forward	676.5363113	36.4297	2817209.635	4753458.329	1412663.929	2017792.02	2816246.668	1567642.141	13656573.58	1620037.429	2326396.604	2058698.637	2001710.89	1652930.465	1965459.263	2526973.294	1090891.229	1531944.256	1358170.662	2522437.878
384	Isolinderanolide	forward	337.2736411	32.2314	3750209.636	3561491.634	447605.7745	3431508.951	2404615.383	3200978.791	3377034.409	4883776.994	3614076.15	4521988.915	4339947.353	5860754.606	5856002	5234407.345	4943533.473	4765564.978	4839443.004	6280652.474
385	"PC(22:4(7Z,10Z,13Z,16Z)/16:0)"	forward	810.5980433	64.8954	86267.31903	289154.4361	NA	441654.4795	NA	575659.8592	77709.58374	153460.9015	136899.0552	200917.9538	163759.3035	255696.8407	NA	1620894.273	342537.4632	549265.1775	398053.5574	271094.9072
386	1-(4-Methoxyphenyl)-1-penten-3-one	forward	191.1066433	33.35225	10525956.28	11946822.55	11129836.08	10629653.73	5723470.632	8175545.732	12290082.87	9190835.502	10917081.04	10071802.22	10059906.254	9746307.822	10786007.92	6720351.159	5881692.433	10107705.8	6239222.3	8787722.144
387	Estriol	forward	289.1790939	99.33805	4982213.419	1581793.395	2695382.354	5153124.312	1437785.461	3637196.89	5396290.454	9711760.103	10386223.55	9727865.403	9941949.68533333	12425086.46	15678941.65	10133592.98	15232499.32	14114420.08	14158108.09	14772774.62
388	Ptelatoside A	forward	415.1578342	436.05	NA	1353544.901	NA	3559813.293	557585.9328	NA	NA	1128052.533	1122888.932	1152810.448	1134583.971	NA	NA	8733.092568	NA	6513.324798	23479.24121	236775.0232
389	"p-Mentha-1,3,8-triene"	forward	135.116672	32.261	34342816.88	31791207.45	31650173.72	34042272.71	32534964.32	29723927.03	31667030.92	33172191.9	34242546.63	32151780.8	33188839.7766667	32661570.27	39338010.84	32137738.3	33417346.55	46480163.44	32845068.24	36172958.86
390	Lutein	forward	568.4253408	32.8057	65620356.79	65889946.36	64472154.59	69310395.31	52928602.79	55435404.25	57472533.47	36228934.65	37652517.09	37147784.2	37009745.3133333	3819656.493	4484999.995	5032923.674	3749037.854	4741109.596	4761215.333	4749857.939
391	"(22E, 24x)-Ergosta-4,6,8,22-tetraen-3-one"	forward	393.3139333	32.2682	12288033.76	15736892.1	12436931.97	10602750.09	10561396.57	11410535.67	11043073.48	8407477.15	9823436.239	9827843.595	9352918.99466667	8392068.143	8079732.58	7271419.999	7227329.821	6868132.513	9071538.884	7828528.996
392	2-Hydroxy-6-pentadecylbenzoic acid	forward	349.2733235	78.8709	200000026.6	254255296.2	158235131.8	210847569.8	119705124.4	174692251.2	258318899.9	132246092.5	137191300.2	137641128.4	135692840.366667	NA	NA	NA	NA	939859.5777	NA	NA
393	Lycopene	forward	536.4363299	30.5399	14822683.23	13665781.37	13106015.49	15887818.68	11324007.04	11311310.35	11792899.7	4675627.887	4864809.099	4814466.427	4784967.80433333	442671.6507	546313.5605	523644.2005	482941.0931	748662.0052	756844.2495	715800.1458
394	"PC(22:5(4Z,7Z,10Z,13Z,16Z)/14:0)"	forward	780.5509999	88.2166	2912811.507	4107885.413	3737368.409	6580225.661	425072.9336	4620281.382	1627950.679	5714859.653	3512396.341	2659743.326	3962333.10666667	2229878.097	896812.2788	2914155.172	2310764.727	5356724.4	3216660.891	3709970.781
395	gamma-Diosphenol	forward	169.1334463	41.772	2502834.81	6068542.34	5556377.386	4618313.182	6308435.568	2760760.702	4433519.683	8035708.369	8800290.551	8647672.109	8494557.00966667	9398428.449	18807707	5589695.741	14144511.15	16441503.87	22737498.68	12892199.53
396	PC(15:0/14:0)	forward	692.5247032	61.05635	2672300.698	873414.37	737336.897	3017991.072	2300532.73	3522842.82	4427476.961	1496716.419	1705947.753	2318638.197	1840434.123	616604.1773	4132422.194	1303100.611	3062313.295	3659156.989	1037834.82	1956252.244
397	4-Pyridoxic acid	forward	184.0601897	45.4135	12583248.78	6582577.303	12195489.18	4148078.77	3719953.202	63017012.42	15920530.21	16729003.24	21965912.53	22909073.91	20534663.2266667	27686462.64	30084527.86	23265811.02	27753803.21	37208127.38	23834693.19	45435756.64
398	Threoninyl-Phenylalanine	forward	267.1342384	422.135	560977.8723	2086592.191	2196428.423	3310192.04	274121.4123	2343753.312	1567224.801	2427150.081	2417833.736	2361004.647	2401996.15466667	1607169.572	112161.0237	785040.1318	1584561.655	358724.8937	1572689.042	441830.0969
399	Maslinic acid	forward	473.3626396	35.3361	16308768.7	20252594.22	18181708.34	20000438.82	17706001.62	18126727.93	23694618.99	18417033.55	24293596.29	17562507.68	20091045.84	12039468.7	16622630.27	16790657.48	12507683.77	15425010.12	15591612.69	18508277.69
400	alpha-Methylstyrene	forward	119.0855765	54.7996	13691821.9	8136787.258	12872187.04	14370687.27	14108271.4	12252587.41	8579070.42	19704555.26	19556051.07	19262837.88	19507814.7366667	20302344.1	41966272.59	15145161.13	21661959.96	18870148.62	19709714.27	15644733.65
401	PE(P-18:1(9Z)/16:1(9Z))	forward	700.5289884	184.5485	9496224.709	20384079.09	13166520.07	142451.8944	3486930.633	27375016.34	9315795.118	9876740.221	9361199.632	10155373.42	9797771.091	11960276.14	8589593.515	22106665.71	12360701.61	21115407.88	19623733.9	11357939.89
402	"5,6-DHET"	forward	339.2529346	94.28545	26078720.95	25646958.47	12246953.34	23621818.31	21987049.94	20041008.91	23086093.11	20079377.99	25474303.55	19398298.77	21650660.1033333	14675640.55	32665970.3	13895819.27	37101228.68	35619559.86	13307126.32	9461211.162
403	Cyclopassifloic acid A	forward	537.3790638	204.51	332249.0533	1842282.798	NA	NA	10996581.68	95497.39201	1046785.711	714025.5785	654809.108	807727.7312	725520.8059	NA	NA	2851377.82	NA	898148.9031	179558.8101	922236.3794
404	PC(18:1(11Z)/14:1(9Z))	forward	730.5389646	141.7655	6458268.998	20358896.75	2119377.147	1812866.967	17787625.23	3621970.37	18349419.33	6302639.226	7067261.958	8502886.377	7290929.187	3774503.466	1300744.717	5330401.434	1818365.7	46750804.54	10185097.02	3497958.065
405	Acetylhomoserine	forward	162.0760149	303.7915	2550799.087	6202183.121	10702748.71	3778924.241	6457920.366	5539237.861	4880689.728	4842442.832	5171879.331	4409741.583	4808021.24866667	2134920.554	783017.3187	5076215.369	4196374.495	2207555.86	4525877.408	4212673.628
406	"2-Isopropyl-3,5-dimethoxy-6-methylpyrazine"	forward	197.1282035	268.095	1389166405	330844809.4	375752790.5	437543507.4	97344992.73	73002225.13	314165565.3	296671222.3	297294881.7	311376883	301780995.666667	1996958.401	2754955.165	7786833.471	49232044.34	36545566.39	1732255.587	14982069.26
407	Cis-zeatin-O-glucoside	forward	382.1754818	185.2595	13604259.41	8243936.589	13278192.66	15154437.81	23507522.42	3720835.448	15529697.76	8709466.641	7796208.243	7629566.478	8045080.454	1837789.227	6552158.522	4917571.647	12552246.81	4077625.867	6176019.782	2259363.881
408	Imidazole-4-acetaldehyde	forward	111.0555362	62.4937	15996562.48	19817514.89	11959777.85	5544927.374	11087337.62	25054161	15770175.22	25220520.39	21344408.68	25686876.53	24083935.2	34822421.88	16151730.53	25739484.78	14077020.2	16149768.25	36368271.55	31547924.28
409	3-Aminocaproic acid	forward	132.1018553	119.812	4445205.867	6044406.194	8060186.816	5489555.787	5289026.842	9990904.108	4762165.158	7708939.889	5921097.95	5882830.432	6504289.42366667	4426685.105	5331488.5	4762309.887	5358076.875	5730115.191	5294632.373	5415787.029
410	Mangiferdesmethylursanone	forward	429.3727324	31.3718	122331120.5	152419659.2	128851211.5	124191636.1	71998923.89	132649141	142545891	84086720.95	91009705.52	82050550.37	85715658.9466667	22807419.09	20520222.67	22715778.37	22850387.19	30723965.11	26564393.29	31350587.16
411	Isoleucyl-Histidine	forward	269.1606503	310.36	31313739.78	22063942.16	23095370.02	9969310.112	41697338.69	20294067.42	18991436.72	15259854.96	17543333.19	14754789.86	15852659.3366667	1229265.649	4516810.764	7518420.493	8155634.506	2571137.911	9323373.327	3171497.85
412	1-Nitroheptane	forward	146.1173442	400.39	191380640.9	102223959.3	102037099.5	140810945.2	11903727.02	132783797.1	14198190.02	118422910.7	114654718	112699367.8	115258998.833333	NA	NA	167266619.7	NA	NA	NA	46787509.46
413	25-Hydroxycholesterol	forward	425.3405538	34.797	5064457.759	7459251.516	7877798.596	5205418.517	4026714.053	5689986.563	3950865.315	4960991.33	792672.6948	5564724.345	3772796.12326667	5488760.682	98155.33212	8686627.809	5304873.957	6823502.284	7646827.32	8563222.071
414	PC(15:0/20:1(11Z))	forward	774.6019845	164.6145	8994348.741	17337603.37	15739316.28	18065212.19	4686957.497	31766669.96	11073313.75	17166641.94	19679298.59	19499368.59	18781769.7066667	35859606.06	16541283.67	42711046.65	40625664.41	51763396.2	41501993.01	44897524.57
415	Neodiospyrin	forward	375.0864867	192.196	12273605.91	14826443.09	22084200.88	18226903.8	37265255.65	6535154.339	14072876.81	6510149.569	6840321.291	7272971.489	6874480.783	1157446.793	2080202.167	6946091.653	3488776.215	1111134.145	1717504.406	2461091.706
416	Arginyl-Valine	forward	274.1872196	399.18	4470147.68	5457831.546	4210350.53	2029361.983	9236078.722	2543711.226	4697231.17	2252972.113	1482969.28	2219576.894	1985172.76233333	344349.3129	534333.5104	994082.5442	NA	270256.5389	1500170.12	548006.6785
417	"trans-p-Menthane-7,8-diol 7-glucoside"	forward	335.2077854	323.202	11449262.51	1859061.119	9084966.888	4156742.13	33059221.42	1900294.877	4132884.781	2974983.325	2977643.215	2694823.748	2882483.42933333	407272.1718	632793.6906	1277395.813	1226686.462	940947.0479	909186.3338	127431.0209
418	20-Hydroxyeicosatetraenoic acid	forward	321.2417495	56.3268	17976462.32	17662973.72	10704482.47	17736249.85	14315838.01	16984107.6	21221387.27	22616653.67	24024018.6	25702133.91	24114268.7266667	37712717.9	36965984.69	19885035.86	23110891.27	23868291.15	36086700.7	22051157.91
419	Dihydroactinidiolide	forward	181.1223265	36.5719	17106506.9	16942246.75	17549857.28	16798553.18	17268784.36	16808562.91	13667877.91	18700168.89	16360423.11	16540671.04	17200421.0133333	14969170	17147127.99	10317715.48	22190435.63	15795026.93	16057149.32	14797127.22
420	Erinacine D	forward	479.299605	62.46605	5213132.448	4334721.201	5132216.709	6781807.66	8138704.974	4221697.541	5013815.987	6483615.389	4475320.345	4739056.376	5232664.03666667	2597273.675	2853420.946	2752306.226	6377882.501	3706240.972	3117147.872	2483123.152
421	"DG(14:1(9Z)/18:4(6Z,9Z,12Z,15Z)/0:0)"	forward	559.4380186	25.17075	2998883.08	2450855.119	3727088.506	2385160.457	2843414.255	1654954.27	4409643.866	1526205.128	1548846.791	1631273.481	1568775.13333333	3655380.041	2796952.217	2774514.316	1854729.095	1413502.725	3426295.274	4074537.713
422	Alpha-dimorphecolic acid	forward	279.2316978	64.1805	68223023.98	38882049.33	58970403.27	81219842.09	46605527.22	92890670.27	89563915.91	87299578.31	94479370.13	95047665.74	92275538.06	101064910.2	164361567.1	58738840.96	88334986.02	97884950.9	114081292.2	115519794.5
423	Sakacin A	forward	289.187108	418.5365	42338099.5	29482698.06	35515872.19	18713900.27	78457346.07	13085163.42	16769554.55	10798066.21	10938168.33	10547312.95	10761182.4966667	491186.8666	2176474.06	4233538.933	4242086.175	509547.9257	3141309.293	768506.6766
424	LysoPC(14:0/0:0)	forward	468.3082066	196.941	755202.2597	714482.9464	1295311.166	328902.1111	482587.3002	818336.1994	689817.7316	447571.7998	521424.5097	445550.1481	471515.485866667	103592.5067	94465.71901	487615.1924	234741.8545	284621.8354	160233.5173	249787.7734
425	6-Decanolide	forward	171.1376604	46.12495	2353583.8	2158475.922	2002110.197	2182505.059	2252449.066	2284002.898	2157863.967	2126535.915	1630004.237	2583780.159	2113440.10366667	2733798.245	4955579.02	3068055.05	3758666.985	4243941.855	3866572.353	3001030.189
426	"LysoPE(20:3(11Z,14Z,17Z)/0:0)"	forward	504.3072241	219.933	5391160.644	10351347.45	7472458.578	6654698.074	3532416.317	4629272.328	5337251.312	4649068.646	4417411.908	3892353.342	4319611.29866667	1606448.868	745651.0174	6852187.062	2780153.564	3171284.246	392549.2286	4393587.9
427	"1-O-beta-D-Glucopyranosyl-2,3-di-O-(8-hexadecenoyl)glycerol"	forward	727.5332515	62.4084	1727321.341	2329238.512	2495182.148	1516729.25	696854.0787	1024068.719	3913562.2	673573.9908	585998.3113	508099.2196	589223.840566667	487468.9222	555729.8278	718272.4868	330593.0436	NA	474472.6103	1090362.389
428	1-Acetylcyclohexyl acetate	forward	185.1170085	48.1307	2697049.988	1934652.41	1013100.87	1281871.29	2296411.279	3873804.181	2938551.615	3627718.632	3634436.355	3424602.007	3562252.33133333	4761053.434	6047443.54	2411487.54	4856357.152	5531204.028	5040746.455	6267823.861
429	Dopamine	forward	154.0860146	61.5919	20853267.38	3162080.658	37169688.39	3483083.725	5007847.511	9540983.576	3763867.668	11948083.34	12007676.05	10655638.72	11537132.7033333	9236300.655	14214585.19	8425647.34	10824525	7534947.817	11540948.42	6767159.733
430	PC(14:0/18:1(11Z))	forward	732.5530772	41.07775	13534240.99	35275384.69	679303.1959	NA	30460501.29	387482.4726	13497123.54	9062717.696	8776221.941	9969902.371	9269614.00266667	524770.4855	231725.0867	2713174.494	704169.8759	45029936.83	6997233.723	58457.23255
431	"LysoPC(18:4(6Z,9Z,12Z,15Z))"	forward	516.3067028	218.64	611845.7069	769591.1859	830691.9376	1226887.093	417107.1325	634442.6047	762191.2898	539078.1754	674637.3093	448123.6579	553946.380866667	217821.6395	441642.6789	899283.1261	587747.2729	759616.6786	563446.4949	103069.6432
432	3-Methyl-5-pentyl-2-furanundecanoic acid	forward	337.2740787	216.1215	2196335.921	4625410.409	2645291.386	2412868.803	2012985.008	3326196.598	2335062.359	2042084.392	2268325.416	2218218.749	2176209.519	600175.0037	485703.0768	2406343.428	1667451.207	897340.1602	1072146.025	985467.9517
433	alpha-Pyrufuran	forward	275.090736	207.316	768248.9795	NA	3074961.691	4918105.385	1601628.481	3765942.429	4963451.351	5517636.713	5582024.587	5414961.194	5504874.16466667	NA	7819984.79	NA	7062445.147	NA	1921931.63	NA
434	"DG(22:6(4Z,7Z,10Z,13Z,16Z,19Z)/20:5(5Z,8Z,11Z,14Z,17Z)/0:0)"	forward	687.5077844	64.0728	5322228.39	4584484.21	5513493.907	871280.7575	6452222.843	1071938.275	4901302.609	294187.3392	1367871.545	1300507.615	987522.1664	116869.9586	381597.1821	1054933.468	204594.5484	797254.0135	516420.6403	150007.0326
435	Valyl-Glycine	forward	175.1075763	399.9785	7773976.092	4315604.951	8588431.617	10600754.66	8978037.758	4522494.746	6063138.398	5403090.019	5003291.559	4917524.342	5107968.64	14845676.12	2960045.215	6373404.737	4506174.783	4178546.431	3419399.12	3006945.771
436	Serotonin	forward	177.1020231	129.0685	30046188.75	35527856.28	25507385.91	10639544.85	37011047.33	18235222.84	27943412.91	23035401.65	23179972.37	23054824.39	23090066.1366667	23413985.94	13109574.38	23918150.04	23089801.64	24164499.02	17888567.45	21209769.41
437	3-Acetamidobutanal	forward	130.0862564	40.2406	6473562.464	7962373.612	9056539.914	6475883.838	5048919.836	11004243.31	5607260.423	10636605.93	12758806.92	7799689.05	10398367.3	17887565.57	15302077.35	12035286.17	8801234.942	21819287.79	14430889.03	14808571.95
438	Epoxymurin B	forward	531.4780817	164.559	1297713.162	2238278.455	582097.0366	NA	2904892.269	548424.1302	4995662.377	1075659.167	1217130.993	863758.9645	1052183.0415	NA	331359.8938	748651.5018	NA	NA	777577.0896	339418.2657
439	Acetamidopropanal	forward	116.0706812	56.9914	11505091.61	6622871.65	11657601.95	8139282.713	14791874.63	6799853.549	9563374.95	8890415.892	8263649.669	9352747.979	8835604.51333333	3845140.137	7275420.758	10718649.02	16467531.97	4991794.919	5944122.6	4735568.55
440	Nb-Hexacosanoyltryptamine	forward	539.4942856	174.047	831407.3037	1172422.187	761157.4114	640751.221	205309.4832	856949.1354	1400832.74	232084.9844	985323.0045	567078.8277	594828.938866667	433760.2939	635890.7812	801898.7043	758410.667	14649526.02	540916.21	785419.4768
441	Tyromycic acid	forward	453.3354407	34.83265	11278586.93	15393931.35	11830705.25	11013154.65	7532911.551	9231624.145	11789346.89	15835346.32	14047073.85	13212291.26	14364903.81	14430843.14	15809233.97	15623778.24	12793434.76	15005064.3	12615119.23	15621532.48
442	2-(4-Methylphenyl)propanal	forward	149.0960899	48.6673	8095332.412	6953072.659	5491226.5	7461286.51	8392152.571	7359661.845	3451714.812	12771097.67	14066919.35	13641895.98	13493304.3333333	17987881.3	17832886.68	14311670.16	20265019.89	18936323.7	18478333.83	13752897.59
443	"PS(18:0/20:4(5Z,8Z,11Z,14Z))"	forward	812.5423411	202.075	116305.1603	979322.8694	661280.0563	533874.9589	97699.7242	522731.6973	338036.3592	299196.4685	229676.2934	190802.955	239891.905633333	884458.2593	81670.58792	749673.0398	133104.1237	395718.8009	328784.9498	826417.3876
444	Glutaminyllysine	forward	275.1716001	430.088	17864831.76	14271640.27	14877054.1	5633542.557	36961864.62	4982006.434	5766017.542	4912112.517	4619027.309	4467239.469	4666126.43166667	263386.6897	800566.5088	1775088.62	1988559.714	291792.136	1804313.44	212756.0496
445	"PE(20:3(5Z,8Z,11Z)/15:0)"	forward	728.5241139	169.7595	13190525.45	18725136.4	13267708.68	14276606.96	5122662.68	20303829.55	13002921.65	10052517.58	10379488.44	8429711.148	9620572.38933333	3219858.604	3206155.931	11053308.24	2996930.618	6919322.811	5974663.549	12167982.17
446	"2,4-Dimethyl-1H-indole"	forward	146.096378	176.66	39040085.34	46708752.35	45044655.97	88934511.03	41542254.49	150423754.9	93069379.55	81048146.59	80358512.18	84579096.3	81995251.69	86759029.93	42763318.9	52536950.15	48839798.41	46108174.5	207260466.2	81934391.44
447	L-Glutamine	forward	147.0764159	322.73	6349914.869	6033438.369	6106351.689	6011256.09	9146285.964	1238644.95	7027008.855	5792053.389	6996769.204	5237831.051	6008884.548	2449276.75	1623092.938	6467574.019	7907850.987	4319081.383	5609812.401	3942777.117
448	Hexabromodiphenyl ethers	forward	638.5455343	191.313	3242135.109	2797638.294	5261699.167	5337678.923	6467228.748	858875.9996	3867210.025	1166913.635	1301453.452	1385049.344	1284472.14366667	190424.9932	1270403.928	2428778.699	1932993.384	197541.9963	1201391.716	440613.6654
449	18-Hydroxycorticosterone	forward	363.2180719	24.3826	163372.4941	117769.1144	100985.5481	178785.9532	183530.8534	234099.8425	101775.1796	102392.6291	114493.9395	121741.5765	112876.048366667	87230.92816	106544.4705	45124.86847	58803.56675	86169.30483	74549.65471	72851.87038
450	12-Keto-tetrahydro-leukotriene B4	forward	339.253106	142.302	7323527.129	3819871.322	6390807.356	5254706.955	3850375.88	4887274.846	6889334.873	8154185.844	9251556.67	10144819.07	9183520.528	8592699.942	10754861.39	1760905.898	13630443.97	5855171.285	13090107.55	9200885.665
451	ent-16a-Hydroxy-17-acetoxy-19-kauranal	forward	363.2523075	55.8616	3371090.996	5028337.125	2849076.48	5847988.838	2382178.903	3682920.029	5171147.851	8540177.54	8563735.933	8568681.267	8557531.58	8187695.781	12174215.56	6499180.707	10228741.55	9427096.862	9737688.241	10766694.99
452	Melanostatin	forward	285.1916837	462.9865	11906080.94	7697389.969	13230031.15	10508492.09	23818478.03	6462237.207	8354125.305	5113271.318	4705878.801	4655690.198	4824946.77233333	366679.1309	1537795.07	3328190.079	2990460.261	776266.086	3087133.672	688744.5704
453	PC(22:1(13Z)/14:0)	forward	788.6174426	25.0698	68398.55336	137770.0689	169275.8848	149260.9842	101179.8333	77003.47366	145478.258	23430.26683	36989.25621	31075.65295	30498.3919966667	NA	NA	NA	NA	NA	NA	NA
454	Dulxanthone F	forward	385.128192	55.1993	8209891.695	7025470.777	8129309.741	7721144.065	8609489.587	9372831.968	10163537.84	10541375.31	7796432.306	8731175.499	9022994.37166667	4104793.859	6936496.927	7116415.623	5246657.272	4075904.149	5737114.287	6929373.932
455	6-Deoxohomodolichosterone	forward	463.3774066	30.78	28383657.14	38388025.14	1437414.594	26374907.14	32596305.78	25292818.19	29616646.01	25629714.46	30447232.58	29552257.15	28543068.0633333	22507052.69	25326937.52	35353185.7	29671779.09	32107365.56	27877750.22	38281344.66
456	Ursolic acid	forward	439.3562626	32.3397	24428868.35	32460200.74	29927320.05	27136878.32	25046720.79	28367329.51	27686268.69	24783138.14	25816523.6	25815628.73	25471763.49	24181898.37	21882644.44	28715960.49	21694824.49	20488182.31	22891363.82	32420061.23
457	"PC(18:3(9Z,12Z,15Z)/14:1(9Z))"	forward	726.5056044	144.682	818159.8213	3817490.755	1181012.829	726075.9445	2701581.667	1800192.592	4434162.361	1293079.776	815906.1706	218727.9246	775904.623733333	NA	48893.03743	712184.8951	127744.5206	3601949.138	333076.7065	665171.6107
458	Nb-Pentacosanoyltryptamine	forward	525.4784159	174.891	535082.7076	648584.3358	912201.1352	350101.3073	107185.6278	588198.0942	1351571.917	836969.5894	1639208.044	761170.012	1079115.8818	212525.7852	444100.676	568281.628	688214.8372	24784837.32	362921.251	469923.8459
459	Hulupone	forward	333.2039355	57.4013	6330668.304	2701619.728	5628354.827	3592276.272	3769420.139	4920601.391	4968236.473	14841771.84	6859587.79	5420930.685	9040763.43833333	9089827.367	7689187.148	7533493.837	10836762.39	8459041.271	7354049.135	7235267.063
460	Leucyl-Glycine	forward	189.1231452	368.994	21591628.51	38302164.64	21087225.29	17347642.59	13355780.66	15136858.72	19323086.76	20626055.06	20010538.26	20479139.63	20371910.9833333	16758304.04	9013037.419	19485152	17321397.77	14440133.02	21848878.77	19894363.26
461	2-acetyl-1-alkyl-sn-glycero-3-phosphocholine	forward	524.3697664	213.347	110846203.7	372056813.5	260972920	214290341.9	8874812.859	193852785	791063.3422	130872588.7	400336.8967	129153964.2	86808963.2655667	37355098.17	24761237.33	195278091	106181422.8	114508436.2	71302561.32	126423996.8
462	"(-)-7,7-Dimethyl-2-methylenebicyclo[2.2.1]heptane"	forward	137.1325047	31.8366	6019173.361	7594762.476	7042744.287	8060772.473	9146899.258	6073620.554	7855616.062	3100576.365	4936497.114	4620810.392	4219294.62366667	3233431.536	5501955.157	6320715.347	6389437.909	3176839.435	7213355.291	7427832.665
463	Methylisoeugenol	forward	179.1064079	221.543	11619605.33	97984818.23	854467328.6	56681679.15	79872909.62	140834573.6	62770776.65	118505744.7	123377920.9	110295483.8	117393049.8	3573966.391	41017224.82	1468773.939	51694579.89	13710871.43	27817825.83	3195229.854
464	Ampelopsin D	forward	455.1494049	78.0137	5499919.254	11412316.42	3155446.766	5069091.673	NA	10684953.25	16214420.47	12162773.09	12519839.1	13463817.96	12715476.7166667	10081183.37	12156726.5	19232770.82	4133768.378	6661173.741	7192962.488	30126656.79
465	2-Phenylacetamide	forward	136.075537	320.564	18010957.59	25231526.76	8212343.772	10116025.32	16293723.73	17982909.31	14525843.28	16136326.32	16851478.11	16303477.53	16430427.32	14158306.57	6378875.433	16954676.87	13100619.95	10774711.49	20305095.79	11830035.43
466	"PE(16:0/18:3(9Z,12Z,15Z))"	forward	714.5085332	170.6165	101707622.6	217478671.7	117403231.2	102494550.3	45277021.82	154717747.6	116734796.6	65473235.16	67926230.85	68439908.05	67279791.3533333	30069433.41	29746883.98	50978365.23	32194281.03	34152598.05	48301725.38	62550502.42
467	13-L-Hydroperoxylinoleic acid	forward	295.2265061	103.613	2696474.711	1434630.492	2017357.174	1962171.531	2082315.508	21236885.32	2570543.443	4163801.326	4842023.389	7518984.471	5508269.72866667	4114748.918	4424451.868	3751052.558	5773136.116	4318427.523	4954874.862	3887021.387
468	Diplodiatoxin	forward	309.2053794	174.953	6435729.548	6494091.291	8271075.111	7595257.595	7793619.266	5608045.575	9586274.888	14238809.73	29289735.88	13655203.98	19061249.8633333	20523484.15	20245738.59	15871238.2	22740604.19	19029869.92	20920205.37	15886112.84
469	Melilotoside A	forward	591.4258878	188.724	31706.04796	286753.5146	211028.311	NA	7049638.827	NA	441846.6365	1387452.28	1139385.918	1454196.857	1327011.685	368602.4231	165921.5076	4803582.726	2584532.162	245597.2057	68778.6457	1050200.327
470	"PC(22:4(7Z,10Z,13Z,16Z)/14:0)"	forward	782.5685375	67.49365	15185832.16	28944565.11	17276930.36	36372216.36	5042919.484	36351792.89	3531446.487	12754861.85	14223983.61	15543167.71	14174004.39	1270401.013	2508857.184	7078095.542	3737926.234	7514540.725	5164217.068	3460658.12
471	Spirotaccagenin	forward	447.3096119	37.53	5007807.576	6568815.21	4151082.861	5861053.232	5033755.606	5128588.09	5406882.516	8591161.177	6510056.165	6981909.739	7361042.36033333	6820742.013	7276365.738	5722394.714	5778558.749	9078882.053	5266568.743	4222474.635
472	Physalolactone B	forward	501.3203114	37.6439	939881.1676	895167.8874	371305.5793	1258629.953	1800732.407	1378324.649	2120380.791	3026738.885	3219540.853	4104448.549	3450242.76233333	3132260.676	2222373.79	2317962.993	4189213.815	4624759.115	2729007.613	2229807.057
473	Diepomuricanin A	forward	547.4721891	170.669	1538303.104	865936.7746	544157.7298	396241.5094	892171.4691	1782032.587	3015180.893	1012329.088	1097514.277	1205074.573	1104972.646	549275.6767	917934.829	1131703.189	51841.04024	1170922.95	100924.0919	548627.5856
474	Cafestol	forward	317.2101171	42.2373	3890130.454	4073152.589	4857206.463	6744444.43	6530522.718	5553384.023	7256312.202	8010569.62	9199492.452	9709866.435	8973309.50233333	11494756.35	11410480.94	7358146.585	11079577.89	11392330.29	12027817.05	7873342.987
475	Austin	forward	501.2112137	24.1525	989221.8564	1296419.316	1238784.181	1077574.862	1028193.043	1153294.145	602541.5263	520159.9721	558716.443	588691.7118	555856.0423	84266.22136	56184.91555	75185.85504	47788.35491	60778.67057	71567.9	37250.95608
476	"DG(22:5(4Z,7Z,10Z,13Z,16Z)/20:5(5Z,8Z,11Z,14Z,17Z)/0:0)"	forward	689.5126856	33.9503	1667179.511	2329708.856	1835794.782	1835358.502	2483877.393	667111.0756	1968225.8	1811116.743	2506861.392	1138231.953	1818736.696	2466979.598	1687301.396	2156591.123	1560817.41	1307888.272	1643769.652	3085712.398
477	Medicagenic acid	forward	503.3351492	86.5047	620443.2063	292784.2758	NA	234739.0984	99892.99834	NA	140646.622	2115264.288	1864533.594	1720086.828	1899961.57	1827161.731	1777793.71	1426538.793	2160006.855	1878318.452	1843228.295	846168.3276
478	N-Acetylglutamine	forward	189.0868102	403.0305	738189415.5	721606339.9	740047733.9	592066747.1	1348026624	397134216.3	521211231.1	373138250.2	359994275.6	372980783	368704436.266667	115513345.4	103257619.8	470664170.2	296741964.8	152548525.7	152807942.2	121874320.1
479	9-Oxoasimicinone	forward	637.466386	176.2125	10674940.45	16574470.3	13329996.18	11853867.66	9437746.348	9550908.997	16701247.66	23489279.32	24154115.91	24218206.24	23953867.1566667	113050416	21017549.94	15411148.81	5788054.978	71316826.56	10884367.2	38142641.43
480	Polysorbate 60	forward	435.2974466	221.576	2672741.153	4203152.615	9384430.025	6780867.918	5950801.508	1704309.801	1824824.458	2439905.731	2462382.465	2507971.155	2470086.45033333	186753.5151	205445.5185	7037940.065	2647355.903	1719774.214	1109853.089	1022916.51
481	"3-Oxo-12,18-ursadien-28-oic acid"	forward	453.3355943	193.0275	10135758.26	5877890.84	13658087.65	20332367.16	15286956.79	5275156.971	5893227.52	4352622.835	4375169.784	4879159.617	4535650.74533333	2429554.729	2559352.836	2575660.951	3497168.896	2095258.284	2593346.932	1546225.085
482	PC(P-18:1(9Z)/16:0)	forward	744.5764194	149.675	10229914.01	4559308.758	24281548.82	23223029.5	14669648.16	5527752.476	6997043.829	4923165.307	5469495.057	5308742.639	5233801.001	4094060.814	5567450.193	13505238.13	21674421.27	5805348.745	5736929.8	2819082.125
483	"3alpha,4,5,7alpha-Tetrahydro-5-hydroxy-1H-isoindole-1,3(2H)-dione"	forward	168.0656119	14.07425	26805617.9	29408394.89	30342322.84	25034622.84	22640610.37	22764109.71	23670759.38	25061051.1	9286360.9	21296902.46	18548104.82	32133877.39	22806909.1	20948497.42	22715965.79	24802852.01	11340224.82	29887209.43
484	Lysyl-Hydroxyproline	forward	260.1601598	306.9795	22688896.23	18248958.62	24414707.29	8941678.199	28136234.07	16941420.18	22216723.48	13949334.23	14171226.33	12563984.61	13561515.0566667	2678761.415	6856874.268	6550621.823	8148431.125	4220541.979	9558099.922	5708134.965
485	Demethylphylloquinone	forward	437.3402352	33.1017	11154897.97	15434273.34	12550493.06	13422669.25	12688181.6	12288623.17	12721151.29	12813583.66	14124063.15	13629513.62	13522386.81	13656868.19	24658354.99	18822659.52	12726479.04	23037042.89	12044273.52	15024883.22
486	"PC(22:2(13Z,16Z)/15:0)"	forward	800.6171648	73.6581	NA	79974.64362	NA	NA	NA	NA	NA	NA	NA	NA	0	NA	NA	43090.54783	162062.3637	129118.3798	53232.48891	361610.0678
487	(E)-2-octenal	forward	127.1118144	31.6217	2185018.131	2845774.795	2175113.643	1935520.903	3957679.322	1958605.994	1695007.634	2502334.411	1978453.311	1871053.811	2117280.511	3065078.208	3444280.586	2606261.764	2045991.477	3149607.109	2725169.199	3845849.39
488	Sterebin E	forward	339.2529727	68.5159	26300854.42	17919191.35	13457693.45	19390072.41	16654137.64	15233588.27	18278224	18221413.72	22051036.68	18830018.63	19700823.01	16228984.1	19280767.22	14365120.43	18682334.09	21656877.66	17515028.47	15461777.16
489	PC(14:1(9Z)/20:0)	forward	760.586427	165.495	168511329.7	278968682.1	278726656.8	282173915.3	92785831.97	462142483.4	173610903.8	235186532.3	251026122.4	252377414.8	246196689.833333	441561268.2	222090634.1	405152898.2	477866369.1	628650858.2	424275253.9	376715011.6
490	PC(16:0/14:0)	forward	706.5384507	94.23535	15059134.6	22646481.9	26696255.59	5326231.316	5583227.993	17949824.44	6164925.448	2185960.809	27043674.28	5621951.471	11617195.52	9660999.25	18228027.62	11315838.79	11084300.27	27439407.1	20681188.72	95147460.3
491	Dihydrothymine	forward	129.066004	154.257	86162559.49	68342898.44	60209571.7	60433128.32	68721315.92	89408124.48	70848352.84	56224208.91	58382303.08	59986614.43	58197708.8066667	54095077.6	35132304.67	79301322.43	54513643.68	67782124.03	52133310.81	39474042.02
492	N-Succinyl-2-amino-6-ketopimelate	forward	290.0857087	249.06	2758668.797	1033059.551	6477773.514	1649316.577	1394358.353	3601997.75	13586683.34	3331402.945	3916022.403	2284769.608	3177398.31866667	1196010.445	667736.6859	2506349.327	375827.2587	774371.947	271087.4655	1421461.888
493	Indole	forward	118.0653161	190.429	11707696.61	10392947.69	14206308.3	15783013.33	11552600.34	11490760.65	13876005.57	15991313.81	16789818.84	17291058.99	16690730.5466667	18900830.19	18257245.17	15266945.11	21668323.62	18217839.39	28688617.38	16577508.85
494	Anabasine	forward	163.1226628	190.4365	448514967.6	425756777.3	774725874	957998079.8	712760162.9	422492311.1	638196388.2	645480416.7	648749101.3	641194912.2	645141476.733333	20557983.01	367582757.4	557276879.9	799449429.5	334034584.5	1396418896	383469757.1
495	N-Acetylmuramate	forward	294.1184132	323.9035	15154602.88	23193455.41	14379292.01	11296784.01	15701673.17	16529971.92	20789362.59	13644438.62	14840022.94	13514142.71	13999534.7566667	8815797.114	1715445.264	17646193.45	8212776.717	8088374.99	8182390.973	11616490.72
496	"PC(14:0/18:2(9Z,12Z))"	forward	730.5393404	41.2771	2117822.679	5896488.437	NA	NA	4225372.425	NA	4496847.076	2034608.473	1867968.978	2339526.456	2080701.30233333	NA	91679.73983	249339.6279	61524.38878	11647277.78	1238585.008	NA
497	Aspartyl-Leucine	forward	247.1288675	443.7395	2469717.239	3032829.62	1839003.673	2934264.637	1536104.408	3685875.355	2417137.551	2976265.572	2972483.414	2792419.772	2913722.91933333	3169506.207	1709933.072	2966150.379	2243080.699	3508890.516	2818964.77	1922695.609
498	Kanokoside D	forward	625.2663508	229.815	24587766.74	257579.4027	20783576.96	12768699.98	9813380.078	11391208.92	11709865	6794414.702	10177265.23	7834245.341	8268641.75766667	691581.6588	461815.8976	1078900.405	362029.4183	172072.1789	321983.9843	188963.4456
499	Camelledionol	forward	441.3351519	35.46515	3171586.775	4155683.84	2694413.299	3942126.292	4624875.047	5839019.16	4154783.718	7647578.527	11389871.54	10503639.81	9847029.959	13410937.17	15507482.71	17109921.94	9788837.781	12712693.31	14209908.48	15201789.24
500	3-Methyl-2-cyclohexen-1-one	forward	111.0805681	36.742	12940747.85	4660977.531	11351780.79	12304944.94	12378503.23	12809662.98	13901978.78	15206577.46	15648653.3	14856501.56	15237244.1066667	20204393.93	17861856.78	16924956.96	17587672.31	20076979.44	20476222.73	11461137.21
501	Epomusenin A	forward	559.5090868	164.5645	1615669.417	2734784.479	1893341.451	1415110.933	691202.2479	1975803.994	1403025.864	918399.0801	597601.4482	935807.8045	817269.444266667	815877.0977	477927.2169	1391896.964	1107327.397	122682.3796	672869.595	416556.339
502	Ginsenoside Rh7	forward	637.433196	189.589	1503061.601	3503781.244	2402563.566	6900640.775	572477.0184	1061340.767	2446093.637	1728962.846	1802879.421	1755880.408	1762574.225	548219.2197	1127748.781	4078946.979	1007915.358	2325214.226	4534581.523	1240653.576
503	1-Deoxy-D-glucitol	forward	167.0925334	121.7735	53952822.28	38686444.68	50152428.36	63694337.29	48434965.33	62746654.89	31045512.02	40064759.13	40197132.4	41664997.63	40642296.3866667	26105987.39	34380905.1	36100052.08	46342290.23	31365116.57	30502010.05	14847873.37
504	2-Amino-4-ethoxy-3-hydroxybutanoic acid	forward	164.0916491	315.977	362112.4467	229781.124	2716667.306	307065.5027	413537.3753	512577.3922	171359.8335	337249.9612	10487693.47	236315.144	3687086.19173333	4905928.877	253575.7477	194531.5027	1138976.923	537377.1678	649042.9696	2036530.597
505	Glycyl-Phenylalanine	forward	223.1074656	293.644	77532615.32	86472483.7	98606420.24	75004458.4	140003304.1	34525121.41	60516599.12	56366155	58186098.48	55586415.54	56712889.6733333	31790981.58	28910278.85	68784687.19	77249985.87	38370128.82	63575575.94	37591731.63
506	PC(P-18:1(9Z)/15:0)	forward	730.5746102	73.20245	501677.9463	197937.2584	3897204.768	1459474.431	1019176.378	770715.4003	678834.8187	619684.3782	602206.8826	702650.8739	641514.0449	1086962.761	250591.4518	3329734.518	1277645.103	NA	1236365.754	1814948.61
507	PC(15:0/14:1(9Z))	forward	690.5069104	57.2724	588844.3281	3969722.08	1027054.852	891038.6506	4865281.591	320081.3463	3769425.638	930760.0035	650964.1662	940272.4867	840665.552133333	274121.4755	368414.2689	818253.4969	1031538.779	7028700.19	1186902.529	349903.5244
508	PC(18:1(11Z)/14:0)	forward	732.5535512	111.279	9204720.611	35379350.17	2789802.727	2799862.84	22010172.54	10411785.7	7195846.56	4943493.73	6555544.921	6728893.844	6075977.49833333	7762463.573	3511834.301	4800755.567	6339489.941	17157851.2	12118528.07	11188521.32
509	"1,3-Diisopropylbenzene"	forward	163.1481216	32.261	12782779.33	18281238.29	16155996.44	18798366.87	21671313.53	15601716.18	15869032.48	13719698.16	13114987.85	11926633.12	12920439.71	11802989.71	11330376.19	12408064.99	10109077.6	9956993.44	11563654.77	14879414.25
510	"12alpha-Hydroxy-13,18-dehydroparain"	forward	377.1956358	25.73515	1377914.82	1565155.85	1537370.916	2849135.519	3901771.63	2246466.314	1783684.448	982532.6758	966657.495	1054138.691	1001109.6206	43430.33679	91583.04725	191678.5178	38009.16145	75467.0471	124949.1143	61047.11524
511	"(3S,3'R,5R,6R)-7',8'-Didehydro-3,6-epoxy-5,6-dihydro-beta,beta-carotene-3',5-diol"	forward	583.4142259	34.13265	30935558.06	33857871.45	35430378.66	34437546.99	34890354.17	30042306.28	23009556.21	12266460.59	13558426.63	12716941.82	12847276.3466667	1138629.198	90132.7771	274235.3082	199720.2082	1275500.402	848981.2472	3292635.524
512	"(2'E,4'Z,7'Z,8E)-Colnelenic acid"	forward	293.2103335	99.5326	15192761.86	8654643.161	12994854.66	13987034.94	11987082.63	21746524.85	16868541.1	26075322.95	25203770.34	25201253.76	25493449.0166667	33771810.98	37358823.84	23662997.59	36523339.52	28353820.87	35487634.58	23673834.28
513	Taccagenin	forward	447.3099557	60.6772	7714444.12	5951376.86	6455552.829	7690820.219	13342905.42	12622474.71	9867080.909	5969708.1	6639646.179	8208674.193	6939342.824	11592990.95	7521393.332	7300592.429	7151037.629	7638253.358	6646556.194	5623685.585
514	Pyridoxal	forward	168.0654993	88.5284	9232289.447	7217104.807	7529520.72	11720857.37	9023125.216	13103000.47	24693743.16	13709117.67	12478637.61	12333537.9	12840431.06	13477079.28	13990916.08	12675170.59	50086918.7	49784306.71	57280076.25	49273977.87
515	N-Acetylleucine	forward	174.1125141	71.9737	5549137.501	3043256.779	7177368.262	11722990.29	7027369.129	7028507.742	4009007.224	7221718.165	15110386.88	8064318.295	10132141.1133333	9368863.933	10101608.28	6317843.21	9584486.778	1670132.492	14546135.13	6375840.735
516	Serylglycine	forward	163.0714313	362.149	2148750.774	3404644.272	1686369.074	795625.7794	68298.02268	165074.0475	1353903.719	1474179.244	1430811.884	1357437.729	1420809.619	626055.4505	617686.3973	1633231.142	1409019.847	543449.5108	1162903.285	644369.4217
517	"Cis-8,11,14,17-Eicosatetraenoic acid"	forward	305.2469635	139.709	8040682.854	11860501.53	7850921.344	8701722.476	13904996.74	6338330.335	13188550.83	13934839.97	13876008.39	15043895.6	14284914.6533333	12656027.3	20127643.64	8886071.972	18718448	17652607.43	23448264.14	15458512.52
518	Cytokinin B	forward	226.1073892	368.673	11943144.12	4825245.525	8650576.001	13250491.03	9301525.564	13254627.41	10067311.05	21280981.4	21330328.65	21868748.22	21493352.7566667	20029064.36	29484206.1	20121870.25	41348810.26	56949699.79	38235115.6	20946597.19
519	PE(P-16:0/15:0)	forward	662.513442	168.081	64584050.41	119713865.9	118566354.9	90642592.24	62209490.64	94449606.27	97035491.6	60612853.64	64825993.52	61734250.79	62391032.65	73504670.08	42175420.55	123147151.4	81919117.6	81105613.28	148625480.7	115322076.9
520	Oxytetracycline	forward	461.159911	78.8572	1364162.438	1334278.567	424884.8162	1588579.782	1486271.956	723073.2093	1161699.612	1756221.377	3195591.009	3125195.966	2692336.11733333	3648379.979	1303729.988	873330.3488	1875739.899	1775506.512	3477734.819	1164209.849
521	"LysoPC(20:3(5Z,8Z,11Z))"	forward	546.352672	214.1435	1527819.025	24463213.11	15714480.6	12516423.49	5442495.349	10849677.31	9543002.407	8752384.66	9111543.892	6551199.877	8138376.143	3147855.858	1333846.543	16262730.63	5608453.736	8421744.824	3810371.964	10230963.72
522	Pseudooxynicotine	forward	179.1178702	223.977	12012508.41	117898240	906673279.8	59815734.58	118868556.2	154120731.5	80483418.64	133074173.2	138570659.7	140835514.6	137493449.166667	17378731.36	38762469.45	119037243.7	55790844.64	41689180.28	31278386.69	24978013.15
523	"PC(20:3(5Z,8Z,11Z)/16:0)"	forward	784.5833154	163.8015	273801634.9	547052223.6	344570102	388307184.8	93246608.85	456225096.4	267446526.4	217278512.2	226063477.6	228437161.3	223926383.7	150418603.9	93501931.95	278561089.9	165356498.2	251901357.6	197432684.1	343598923.7
524	"2,9-Bis(3-methyl-2E-pentenoyl)-2b,9a-dihydroxy-4Z,10(14)-oplopadien-3-one"	forward	443.2784288	61.8088	5412145.292	1825803.649	1595578.346	2471970.639	2269966.936	1337522.291	2090406.443	2234288.991	2645434.914	2283400.461	2387708.122	2817997.287	2186719.454	2691270.774	2966608.653	1954640.735	2693330.722	1049311.793
525	"2-(14,15-Epoxyeicosatrienoyl) Glycerol"	forward	377.2682821	35.8988	2470174.531	4559371.009	3967976.256	4010534.166	4350618.681	3312209.751	6172857.438	9122285.544	8788370.532	6768913.528	8226523.20133333	8167593.704	9360224.588	7665342.649	8293930.629	8066725.762	8844318.677	7041321.375
526	N-Methyl-1-deoxynojirimycin	forward	178.1073671	330.132	1024453.985	2800319.392	1745174.646	49837336.25	6669356.683	6977175.476	10992505.19	7358332.162	7803793.937	7265957.335	7476027.81133333	5538594.844	1104115.717	924975.3407	2456066.018	816063.7341	4738165.353	12853812.99
527	N-Carboxyethyl-g-aminobutyric acid	forward	176.0915264	404.1815	1500978.42	1391594.674	1283203.429	1445601.874	1485231.812	2928357.048	814300.6801	1625584.267	2224870.147	662902.9293	1504452.44776667	2850929.742	5727434.062	4345665.608	NA	1530675.263	3117449.747	3167427.733
528	PC(20:1(11Z)/15:0)	forward	774.6010862	79.7353	1168582.132	4050204.973	3697536.994	3578481.842	372867.244	7994730.579	982100.653	1044534.932	904664.3092	4727218.605	2225472.6154	5076164.71	2331617.323	6969741.108	16379634.44	10356086.35	5969503.001	9146500.72
529	Quinaldine	forward	144.0846749	144.9775	1476064.462	843873.2994	781651.0632	560029.8937	1225198.348	5199065.04	1876234.272	1903831.058	2216642.307	2240657.208	2120376.85766667	1133000.8	1213277.174	7339336.992	2222236.808	841291.9329	2751305.801	1846344.242
530	"6-Heptyl-5,6-dihydro-2H-pyran-2-one"	forward	197.1533541	36.2494	4066485.269	2196920.61	2638341.529	5127436.17	4070183.071	2623563.203	4515321.209	5961468.098	7032874.072	7878307.488	6957549.886	8574609.3	11648403.71	5821145.279	10194310.58	12454752.51	10102857.4	9677671.722
531	3-Hydroxyanthranilic acid	forward	154.0496472	56.3883	1950386.588	2373009.359	3204777.275	2762591.926	3139021.106	9485214.416	4596031.497	3632148.136	3727037.315	4243848.801	3867678.084	6427527.944	4797360.922	3547211.661	2306794.181	3905394.81	6204498.98	7604044.999
532	4-Amino-1-piperidinecarboxylic acid	forward	145.0969789	305.1705	86326914.79	42956018.33	95042047.41	44823012.62	74355208.43	124199890.6	44748490.84	37346422.91	37713955.28	35847128.3	36969168.83	11196499.43	15031492.27	41576455.28	30232693.12	19988611.58	17662916.72	11295682.03
533	Troxilin B3	forward	355.2473273	53.8247	4790869.148	6789828.85	2577019.374	4094853.497	2571773.506	4920853.075	3213698.257	10188367.69	9838315.545	10424503.47	10150395.5683333	8202054.369	24213583.24	6121496.57	8114877.404	7966512.478	6698145.253	8002816.905
534	"(9Z,11R,12S,13S,15Z)-12,13-Epoxy-11-hydroxy-9,15-octadecadienoic acid"	forward	311.2211276	57.53985	14898875.23	5836605.198	11793099.29	10527344.36	8798876.247	15583145.53	8081495.842	16465623.95	18485800.52	17650614.4	17534012.9566667	17632139.42	24049657.51	26246031.89	19106847.35	21156231.61	19560216.85	17725932.18
535	PC(14:0/14:0)	forward	678.5084056	115.1305	17290289.43	27095455.17	15147313.6	9230470.944	7693900.07	16685966.28	13428061.68	10096105.85	10124415.17	14354856.68	11525125.9	6486276.992	7447649.766	14799991.32	9726681.416	16212003.9	9137754.366	15645813.01
536	5-Acetylamino-6-formylamino-3-methyluracil	forward	227.0789312	368.3135	9204494.199	24310694.65	5016966.25	4017696.246	1657819.711	3845243.965	8058856.613	10241914.98	10328824.65	10563898.97	10378212.8666667	7951797.426	3211201.573	9797809.636	5998560.808	6713827.302	12052800.75	9400949.13
537	3'-N-Acetyl-4'-O-(9-octadecenoyl)fusarochromanone	forward	599.4090885	35.1259	18556486.65	19170106.79	19994454.98	18633459.9	21616269.55	16603816.22	12252490.04	7195004.617	8386516.054	7806467.365	7795996.012	513450.9512	668685.4646	406086.7802	599864.3881	741541.1329	455994.7072	NA
538	Ganoderiol D	forward	489.3574179	192.194	18372590.58	11161734.4	16526998.1	22805688.3	18611296.72	10038321.6	12859565.34	9018214.495	9189725.037	8910221.462	9039386.998	3409487.559	2957974.88	3709321.449	5380403.405	3321686.962	3926198.834	1876580.33
539	PC(18:1(11Z)/15:0)	forward	746.5695026	139.496	9920112.428	31450068.91	4597587.405	3111342.603	29022789.92	5326845.587	23256695.24	7959906.911	8338934.778	8234733.416	8177858.36833333	10596401.07	1562737.566	9105751.146	4509648.685	50361174.29	14714235.63	5920192.195
540	PE(P-18:0/15:0)	forward	690.5433422	166.323	13966200.44	19509193.97	22381330.72	18796533.34	10558437.54	19458333.14	14666667.35	13046055.09	14563713.54	14142949.57	13917572.7333333	22613762.91	14357814.67	32092651.98	23781013.27	27818895.46	35049930.22	30688116.86
541	PA(18:1(9Z)/15:0)	forward	661.4795572	59.0571	1417632.664	2430342.598	116853.5165	1412828.381	1091609.206	914895.4441	1817088.436	504144.8047	570289.2991	687333.978	587256.027266667	679985.5954	629217.5957	1306756.305	888960.0029	614422.5456	782347.8619	1340415.245
542	"PE(20:2(11Z,14Z)/14:0)"	forward	716.5231035	169.7585	97871846.05	187348751.5	112934366.2	99884099.18	49215352.52	171557831.4	115481836.4	91281988.94	89281417.64	92303756.57	90955721.05	94253035.26	68733751.19	131478257.3	100227931.8	122529177.3	104799498.9	126623711.7
543	LysoPC(14:0/0:0)	forward	468.3090364	220.763	42494765.8	62807875.71	55104745.49	5655144.144	34822980.31	38187375.77	5004549.703	28570193.81	29150839.59	29557373.29	29092802.23	1636774.317	7693523.003	177510.0061	3416657.452	22238326.95	16326950.25	22807349.77
544	Corchorifatty acid A	forward	309.2053092	207.366	4277050.724	5192777.769	6032068.946	6232734.913	6172572.547	9126346.701	7181286.145	10123221.9	16012468.24	11057339.42	12397676.52	3068931.608	11024866.31	12432577.48	13085869.19	13307646.61	14836782.12	8707621.478
545	"N1,N10-Diferuloylspermidine"	forward	498.2597314	223.7165	2487009.374	5266232.603	3069494.183	2363233.38	2428431.452	1667693.237	2454633.092	1204208.045	1610951.86	1078889.425	1298016.44333333	315044.1336	196049.8102	966650.8106	325886.0833	348827.7738	393757.8958	488108.8547
546	"PC(18:2(9Z,12Z)/15:0)"	forward	744.5515932	132.858	4464869.003	29633990.8	12424560.67	8923719.957	7561158.62	13192868.13	17068826.36	2840028.246	5181792.34	4387893.019	4136571.20166667	13307104.82	2498680.319	29359243.06	15205161.07	16049250.29	14292225.44	7955202.119
547	PC(18:0/14:1(9Z))	forward	732.5530087	141.085	45880865.83	142451559	5287312.222	3957224.332	156599686.7	6232266.933	125895471	36207086.48	41437921.51	41828444.41	39824484.1333333	14727419.01	3572591.588	22408376	5931658.741	239222311	63549721.6	8561086.915
548	"LysoPE(0:0/20:2(11Z,14Z))"	forward	506.3242366	193.68	811510.3951	2690923.136	2620447.199	1435917.328	3889839.004	1124643.111	1553827.243	1234079.411	1058427.764	1385094.423	1225867.19933333	215886.4163	327488.6198	1556885.105	1124673.401	1528575.042	606228.3804	529692.338
549	LysoPC(18:1(9Z))	forward	522.354373	214.97	105306383.2	260296912.1	248062745	201651443.1	113492752.2	250403609.6	104949961.6	136583030	142400215.6	147732438.7	142238561.433333	47369055.35	27695045.17	174099048.3	152010020.6	161386665.8	85679776.47	56470512.19
550	PE(15:0/16:0)	forward	678.5085015	173.2035	140352881.6	142566354	97813794.19	72558162.58	49782583.37	117802617	138834750.1	72209760.32	80242633.66	78795260.67	77082551.55	87402932.13	68131957.71	112700866.8	85957255.94	133350675.6	85625862.09	131622782.2
551	PC(P-16:0/18:1(11Z))	forward	744.5913988	66.77605	4626591.522	5602575.89	19744809.23	4563873.732	2651686.286	11558123.69	7451845.174	5960528.97	5974967.387	5781069.203	5905521.85333333	5810398.636	2940893.083	7074965.586	8686630.023	6084027.156	4420979.352	3440184.321
552	PE(P-18:1(11Z)/16:0)	forward	702.5453781	163.9725	68421878.59	75994440.31	89618798.85	79994386.53	48538580.49	94181435.82	52174775.84	39684132.68	42340225.79	42821809.72	41615389.3966667	49858940.23	28427203.58	114694581	79693366.24	40163688.12	60431562.73	36692611.11
553	Avenanthramide A2	forward	362.1226812	191.7375	16177642.29	15984166.5	12801712.68	18447218.05	13675302.56	14943498.32	22530040.47	21489873.35	20385901.53	21602638.82	21159471.2333333	23461063.78	29949569.24	17162089.79	27891933.66	25273472.6	26763295.35	17146819.47
554	1-(2-Furanyl)-1-pentanone	forward	153.0909463	42.93485	2188157.151	9213323.712	10402278.54	7965720.859	8027903.467	12322844.13	9218042.243	10796293.33	9393161.153	18933175.25	13040876.5776667	13349954.31	13390364.51	8830476.499	15302244.53	12900147.2	13149870.31	9815143.554
555	(Z)-15-Oxo-11-eicosenoic acid	forward	325.2734825	58.13675	42912433.42	20720945.97	21268632.25	37224105.89	31578373	25428914.4	62209132.37	52808642.55	55645267.63	58770088.76	55741332.98	69437786.83	109502300.4	35939385.32	67496624.74	73043744.94	72461447.71	74655137.39
556	2-Keto-6-acetamidocaproate	forward	188.0918101	146.6715	13877084.75	8248112.785	12403500.34	8925906.254	11091099.2	14434854.06	17669335.96	21305010.64	23637278.17	23067628.17	22669972.3266667	27278122.94	28599328.99	22100949.12	29106870.01	26887011.91	27413867.24	18829919.72
557	"PE(20:3(5Z,8Z,11Z)/14:0)"	forward	714.5078742	132.254	4542535.277	22050864.94	23157751.01	19667445.64	9943057.066	29309335.43	7290191.739	6531929.665	1416792.233	4754070.708	4234264.202	5947850.045	2720076.458	7538998.189	4167797.996	2110515.289	14918890.4	11478061.25
558	PC(16:0/16:1(9Z))	forward	732.5538755	168.042	27997033.78	42445366.92	36532111.83	35908287.56	16451269.58	52937470.31	27283629.9	35734657.19	36612973.4	33784841.59	35377490.7266667	35022282.24	25293900.31	71784854.75	45534955.91	72719250.22	60707930.1	56035406.56
559	LysoPE(0:0/16:0)	forward	454.2931138	195.8975	2441633.031	4326202.855	2469731.853	2337185.144	1787045.098	2834559.898	1746726.432	1329501.897	1420176.566	1451413.64	1400364.03433333	211807.7427	370107.1678	1378524.278	900931.4306	804507.174	671240.0978	4200077.086
560	N-Acetylputrescine	forward	131.1178443	275.01	14699097.86	2062392.708	2430436.989	6211519.136	5411384.578	1652129.614	4293953.97	2067174.34	1966663.733	1780777.125	1938205.066	908944.4679	2979793.074	1290906.919	4774986.398	1897275.689	1142144.959	1665476.881
561	"(2xi,20beta)-2,20-Dihydroxy-3-oxo-12-ursen-28-oic acid"	forward	487.3410543	36.8621	4295149.595	4517513.815	3678238.155	4892133.637	7680424.011	3996157.74	4869196.004	9560669.32	6118834.085	5683281.703	7120928.36933333	8575725.325	8328343.282	6892891.736	7493442.687	7365669.779	6197237.145	6848394.819
562	"17,23-Epoxy-29-hydroxy-27-norlanost-8-ene-3,15,24-trione"	forward	471.3106952	86.61	356742.4504	623988.7948	141267.9892	484344.3017	806866.3738	121638.3229	474613.0211	1158481.943	811793.1839	1284637.316	1084970.8143	1300921.551	1521386.501	1105756.316	1566021.33	1524309.722	1333581.536	1016521.316
563	"PC(18:3(6Z,9Z,12Z)/15:0)"	forward	742.5387681	83.2255	31079392.99	66694267.76	26209394.01	16152375.23	13379715.51	37595070.81	10503141.1	22840392.89	10961179.34	12369869.54	15390480.59	2087454.017	4840190.457	18645404.27	7118605.062	7898849.44	8826270.641	16969015.21
564	LysoPC(17:0)	forward	510.356896	216.2455	15228457.58	31597764.88	29885672.47	25769112.7	12599635.21	32174552.32	12706262.67	17680381.58	18744496.76	18498112.84	18307663.7266667	5781565.404	3484533.193	32408127.74	24740709.67	18015124.87	14981213.41	12940878.05
565	"(2'E,4'Z,8E)-Colneleic acid"	forward	295.2264055	36.6201	15354432.79	4082201.031	14056149.74	31098191.88	14053467.58	16324862.72	25208796	26558490.94	28297147.19	27700926.75	27518854.96	38758895.46	41140271.15	23760696.91	24589176.56	31899648.74	28276188.95	34724819.21
566	Methyl Arachidonate	forward	319.26312	31.6397	3636092.692	4256622.554	6244445.247	6416573.132	5277939.098	3305520.452	6412290.486	2792376.651	5586851.874	5737533.971	4705587.49866667	3489179.851	5590762.02	5180578.97	4115408.05	3401169.408	5598243.772	5466495.058
567	Normetanephrine	forward	184.0969433	279.019	2877942.924	3669196.237	2573786.375	2714962.292	4422001.335	3470003.578	1854631.382	3326058.055	3303690.035	3783417.813	3471055.301	2877942.924	3669196.237	2573786.375	2714962.292	4422001.335	3470003.578	1854631.382
568	LysoPC(16:1(9Z)/0:0)	forward	494.3242315	217.5055	11303033.82	14026796.89	16425271.64	15445989.47	8161596.876	9310968.233	9638248.778	1896892.219	9655046.356	8267347.076	6606428.55033333	2001035.836	2864812.3	15124946.91	8226023.376	12739029.31	181470.7791	4095484.785
569	4-Methoxybenzyl glucoside	forward	301.1255746	238.0805	14004056.11	2010823.183	4533263.334	9964188.009	2177188.92	7679212.222	12345951.33	13061208.26	13897432.73	10861558.61	12606733.2	5801806.359	6804099.215	13123110.36	872304.6713	6740820.195	5972413.749	6600811.793
570	"DG(20:4(8Z,11Z,14Z,17Z)/20:4(5Z,8Z,11Z,14Z)/0:0)"	forward	665.5123473	33.47855	1073583.771	1639966.824	1402013.864	1365249.945	1402623.082	805367.9395	1896491.701	1661841.443	1828441.792	1885451.375	1791911.53666667	1730824.269	1776558.258	2438776.312	1311820.961	2011177.517	1695283.717	2837540.511
571	Glutamylglutamic acid	forward	277.1031121	466.395	1601267.807	3060372.294	1346569.952	1277232.306	1675632.031	1388243.955	1890808.502	1592206.148	1620097.048	1380066.262	1530789.81933333	1965994.15	90242.36989	1653340.524	919102.5648	1119971.35	12619.58264	861731.0205
572	Norfluoxetine	forward	296.1234225	318.0895	4227402.768	2952704.556	3517081.128	1992626.575	4335312.388	2142904.291	350477.0861	190185.231	1636707.183	147935.1272	658275.847066667	104492.1346	190615.2969	148347.568	3181196.552	255401.7302	2690423.366	697658.2141
573	PC(18:0/15:0)	forward	748.5837259	167.195	29725687.67	68639943.98	58492206.31	38018026.55	9593847.673	54151187.02	56263877.3	45484253.56	45346364.95	47193740.35	46008119.62	76955216.28	27511439.71	94854830.71	64069350	128127942.9	104369234.5	176410721.3
574	"PC(20:2(11Z,14Z)/15:0)"	forward	772.5845714	124.911	85713.3113	1091327.31	709675.7637	962397.6856	194708.4029	853121.9006	455033.8194	610434.3736	293317.6991	595162.4482	499638.173633333	1589476.267	312485.6062	3461864.224	884637.0202	1430532.249	995398.5923	1100818.425
575	"(R)-2-Acetoxy-p-mentha-1,8-diene"	forward	195.1376743	36.0448	7577479.728	5835413.944	11274673.36	8261607.881	11225326.24	9498264.594	8381648.78	12564639.23	12012422.98	12722700.02	12433254.0766667	23672767.27	28959129.47	12398493.27	14460530.57	18759739.31	19079378.75	19777332.89
576	"DG(22:6(4Z,7Z,10Z,13Z,16Z,19Z)/22:6(4Z,7Z,10Z,13Z,16Z,19Z)/0:0)"	forward	713.5205941	63.1892	3915160.498	6919138.972	4899116.476	2290798.897	12921354.75	1671003.454	14235328.88	3622551.887	2743703.03	3740220.326	3368825.081	710581.9218	1315016.059	2476180.121	647897.4208	823556.5533	1253390.278	972496.102
577	"PE(22:2(13Z,16Z)/14:1(9Z))"	forward	742.5390476	168.0445	78477996.4	192067491	104867157.2	94001895.37	39853897.27	122396549.8	87062871.37	59236556.48	60449456.27	59139677.24	59608563.33	23264368.75	18973630.53	60124251.16	32384414.91	34745955.97	44907120.82	66624554.43
578	"(3beta,22E,24R)-5,8-Epidioxy-23-methylergosta-6,22-dien-3-ol"	forward	443.351064	35.4287	10029482.83	10953055.69	7290844.672	8288437.785	15817203.53	8763242.616	7179023.134	14500358.54	13842549.03	15240367.49	14527758.3533333	9531974.059	8362088.157	13758495.04	8072485.375	7847310.635	9977391.899	10949132.9
579	Diadenosine diphosphate	forward	677.1218987	454.586	285736.8821	147483.2254	133198.0669	278411.6644	1070042.342	552881.4054	617322.5442	272797.4329	286188.2955	319497.8053	292827.844566667	159160.5579	76532.38304	309242.97	248442.3492	269924.2637	148492.5216	60673.5108
580	"PG(18:3(6Z,9Z,12Z)/22:6(4Z,7Z,10Z,13Z,16Z,19Z))"	forward	817.4918223	220.036	517494.3602	386918.3125	207760.585	478786.4531	44642.9128	185242.3934	242049.4354	411460.8812	353148.4016	363514.7878	376041.356866667	449668.9433	510489.2461	274458.4768	238574.1867	668441.2489	434214.4006	206956.3204
581	"6-Chloro-N-(1-methylethyl)-1,3,5-triazine-2,4-diamine"	forward	188.070357	278.93	19480028.73	21272877.52	14636029.19	12197149.65	10125947.88	22857654.54	17341738.98	11691520.83	10875819.89	10928495.84	11165278.8533333	6699615.19	4891347.049	11754041.86	3626058.499	3200513.723	12437463.78	5074066.952
582	1-Deoxynojirimycin	forward	164.091657	149.437	47531746.64	2712221.64	14062140.08	373336.9819	1906139.775	114763330.2	3541755.522	8766323.891	8419915.167	8558814.844	8581684.634	1542629.66	1637565.636	6395156.599	2563316.085	1631077.655	1597607.736	1294055.967
583	"Na,Na-Dimethylhistamine"	forward	140.1181005	256.952	88111396.47	300025503.5	150394241.7	149677336.9	269968772.7	76499234.97	145229061.2	44022487.79	121130340.3	116819859.5	93990895.8633333	6453823.257	19079606.84	165493908.9	56165006.88	8586745.938	42717536.6	15443823.68
584	"2,3-Secoporrigenin"	forward	461.2902721	62.4564	4567373.235	3108412.114	4787402.917	5040757.376	3133773.36	3052680.69	4062969.651	4752056.393	3874068.667	4642030.488	4422718.516	4408276.488	4231377.317	3327808.087	5373221.647	2382919.758	3709589.679	3158691.958
585	Arachidonic acid	forward	305.2467992	88.3282	19006725.03	6429479.306	7119670.538	11425550.29	14120908.3	8899389.673	14924823.33	28190644.01	15507879.56	15367970.72	19688831.43	13507584.8	29895146.33	24521709.52	30571677.22	29991483.76	31711353.1	27936542.1
586	SM(d18:1/16:0)	forward	703.5749463	203.131	106875.1712	136513.9801	57334.6419	265997.1755	32752.78465	112875.6904	66718.32355	222512.0114	102460.8661	179503.4007	168158.7594	320760.198	NA	1956225.882	548596.2053	629999.7141	248947.9157	974095.5845
587	PC(20:1(11Z)/14:1(9Z))	forward	758.5688949	69.7093	150154497.4	137185561.6	249396191.9	7912048.452	21613818.32	454332755.1	25205583.25	66793448.53	75428134.81	189947011.8	110722865.046667	19794961.78	33239203.2	62567080.74	61045385.78	185370152	52596045.07	46202285.52
588	Phenethyl rutinoside	forward	431.1890337	225.517	6736383.975	9635262.078	4117771.931	5260225.445	541360.1471	7433334.515	8002316.557	10846484.91	12612504.97	8868688.853	10775892.911	7388326.058	7761990.198	11925854.57	4329421.875	7452877.153	7096299.064	9195379.831
589	"PC(18:1(11Z)/20:2(11Z,14Z))"	forward	812.6161724	161.23	938635.914	848567.5774	999037.3045	999322.307	45435.88767	1722404.611	942875.9004	910720.6205	1111202.208	1129805.526	1050576.11816667	1673164.763	731855.2915	3278010.534	1989647.109	2420755.614	2749094.095	3996674.828
590	lysoPC(26:1(5Z))	forward	634.4793421	120.013	7508420.24	19618053.3	12517372.61	13976552.69	8146495.84	8515402.345	13999566.08	6421619.651	6157851.387	5815835.951	6131768.99633333	6984700.557	3597961.204	16655311.03	5265657.738	5131731.476	7456998.884	10438355.09
591	Glutamyllysine	forward	276.1551463	472.6125	5205623.435	10394070.92	2795005.219	2390268.128	2995810.4	6802093.422	4513515.78	3920134.657	3547851.544	3578540.349	3682175.51666667	1828012.402	832561.5097	2695948.693	1903752.898	1279280.702	3363380.675	1368610.279
592	"PE(18:2(9Z,12Z)/15:0)"	forward	702.5042792	143.566	1663616.145	3299257.818	3330998.374	2668594.111	674654.7308	3547095.59	2751103.62	977422.4057	766011.4893	1019105.116	920846.337	1123809.797	424725.4872	4009441.263	1650865.316	4095084.537	1675987.562	921422.9912
593	"PE(22:2(13Z,16Z)/18:1(11Z))"	forward	798.6016945	162.947	603133.7533	1392914.251	507415.3514	641758.2987	NA	839156.759	565897.5786	541220.9946	1030277.375	579816.5515	717104.9737	1105279.362	294010.4565	2557647.415	726371.6328	1845621.359	1858835.77	2640988.555
594	"LysoPC(20:4(5Z,8Z,11Z,14Z))"	forward	544.338079	214.717	3755869.726	18394147.36	17677792.14	13780472.73	7007867.173	15281692.69	682459.9655	676545.9586	11161667.01	8030593.02	6622935.32953333	4038404.129	1834909.171	17596744.98	9094400.992	10276896.34	4957302.801	4850697.87
595	Eicosapentaenoic acid	forward	303.230927	34.2709	9787998.826	7280689.221	8553416.919	8214024.011	8914023.471	6673805.18	11807088.46	13507084.73	16284432.05	17340389.9	15710635.56	13433034.99	19277654.68	12880690.05	13119889.06	16774542.96	14538756.54	15139674.47
596	Docosahexaenoic acid	forward	329.2466461	35.44315	5718705.514	3433763.928	3673560.03	7981183.482	3789950.035	3611606.982	5278107.009	6585823.438	7095174.06	7446818.197	7042605.23166667	7903641.54	8347256.079	5613908.617	6431583.542	8338563.382	5704901.519	6026543.477
597	ent-17-Acetoxy-16b-kauran-19-al	forward	347.2576107	36.29615	7542306.999	7930968.693	7672117.695	7669120.971	6974397.815	7649760.413	10105688.86	10405075.07	10195764.72	8194217.416	9598352.402	14595332.55	16508921.2	9609031.616	11752437.58	13184104.4	9193147.728	11317022.03
598	"8,9-DiHETrE"	forward	339.2528522	37.4074	11309691.97	12322421.81	8980830.523	11091190.28	9967632.112	8829128.719	11682738.26	9379960.683	9065755.057	9934697.445	9460137.72833333	7904039.993	11454051.54	5399125.829	7282218.842	10442185.2	8749200.951	9362452.264
599	"PC(20:3(8Z,11Z,14Z)/14:0)"	forward	756.5535277	85.654	76146178.12	133237469.5	59591176.42	287071619.5	32230792.09	113440331.9	34832187.96	50154032.11	155585265.6	51392604.51	85710634.0733333	32866531.24	18916043.87	47053428.21	24075505.98	29605458.8	64583202.01	38191851.45
600	Petasitin	forward	333.2051482	37.4812	5622952.222	5324718.42	4516943.219	6288630.309	6573062.606	4400330.599	4577528.153	9806933.766	15044835.29	9236247.912	11362672.3226667	18079997.27	16269617.54	8580594.996	17987049.73	16304102.11	12641681.79	7402800.096
601	Protopine	forward	354.1334761	60.9618	683146.8625	9727166.16	1344052.543	938717.8648	759433.939	584843.6599	1125567.99	1407271.024	1477562.582	1566706.716	1483846.774	2335650.578	802622.7884	2584049.59	210984.5643	955204.5133	488426.4696	729770.4175
602	PE(18:1(9Z)/16:0)	forward	718.5394762	169.733	64154544.52	116572875.9	76899962.58	63220426.87	47524967.36	116204905	89623943.14	63091986.5	66098822.14	65716029.76	64968946.1333333	72914180.95	46189959.84	132376476.6	82070462.19	118202546.6	90568415.78	88283805
603	d-Tocotrienol	forward	397.3100604	35.1937	5144967.244	3802956.524	29510382.37	4348313.495	3497163.514	2801558.256	2855404.92	6519893.944	4540611.116	4583025.097	5214510.05233333	4039401.847	3372397.253	3969379.292	4321377.364	3072278.198	3547275.844	5132921.324
604	lysoPC(28:1(5Z))	forward	662.5142911	87.6574	11179689.72	19921606.51	16617735.26	9301355.832	6891097.845	20173181.68	377319.0946	9853256.758	21643025.6	10819082	14105121.4526667	8709966.908	3572136.94	10460457.79	23032220.58	9744598.757	6093085.384	7768702.526
605	"N-Acetyl-2,6-diethylaniline"	forward	192.1380399	36.0286	7796339.439	9169677.666	12917732.89	16750647.77	4001095.188	11601961.07	10618486.94	9150163.579	10503932.62	9412236.166	9688777.455	19088082.05	10889284.51	6339398.747	10434884.57	9568506.6	17657365.33	11061792.73
606	LysoPC(15:0)	forward	482.3230451	218.707	7456412.69	193229391	19109785.47	106187645.4	64179465.98	99155358.52	87656754.51	76515721.53	10866021.2	76574390.96	54652044.5633333	20375676.01	14716802.31	110312919.5	46774154.25	60600376.23	48921017.58	77870800.05
607	PE(P-18:1(11Z)/14:1(9Z))	forward	672.496237	78.0023	5136597.651	19363005.78	11260811.56	2588495.042	10064383.06	11125084.9	46678355.67	11805418.29	11793961.52	6583845.966	10061075.2586667	3374200.433	3263380.32	7895106.016	1176733.534	7575446.24	5972117.32	3846979.657
608	3-Methoxytyrosine	forward	212.0916932	431.666	12087654.05	6522375.13	7768238.856	14485588.86	9236017.014	9335092.023	9201009.682	25865404	25018251.12	23618787.07	24834147.3966667	21312442.78	38907473.83	28911662.46	49044578.49	72506289.51	60626478.32	29012675.68
609	PE(P-16:0/14:0)	forward	648.4976524	168.9555	78648909.17	171635443.8	131490050.6	106487328.3	65757389.29	100923828.5	125783030.8	73550350.17	79075020.52	77810062.62	76811811.1033333	70214878.46	54978623.27	142001053.2	80983515.36	95303227.27	139297216.8	143398843.8
610	Cibaric acid	forward	325.2005151	210.023	3056153.813	1621732.476	1887995.807	2307659.099	1905296.873	2613181.763	2580384.89	4637183.075	4366064.943	8557862.97	5853703.66266667	3137526.775	9368384.496	4354257.461	9883342.133	4702862.147	5169450.068	4433164.603
611	20-Hydroxy-PGF2a	forward	353.2317335	46.489	3857913.94	2685205.259	2883645.579	5654627.897	5711182.214	3541879.387	4051779.445	8172113.938	8141265.766	5372459.27	7228612.99133333	10683263.64	9562679.693	6388795.321	11591098.82	10321804.6	9993289.833	7206043.361
612	PC(14:0/P-18:1(11Z))	forward	716.5589412	162.861	4049481.299	1761286.304	8932200.165	9225035.722	3742627.828	4819554.593	6038531.745	3281634.496	3888564.404	3182491.586	3450896.82866667	4679599.728	2636460.528	8458791.142	7337627.526	6336608.375	5988421.888	4736701.201
613	3-Aminobutanoic acid	forward	104.0708337	160.3145	476592634.3	580232491.2	528127710	475636176.7	238491092.3	317110342	403595766.7	357879749.7	357816069	347090478.3	354262099	473761513.4	246286319.6	229632061.7	158248836.7	194640694.1	127572447.3	211014963.7
614	Calystegine B2	forward	176.0915724	150.0425	7712291.748	3494386.928	5539649.524	8001379.649	5265919.497	18338804.06	12811882.13	7499263.697	16191214.06	17241015.01	13643830.9223333	11132145.1	9530808.961	14420757	8183978.326	17984351.81	9052622.206	6929023.848
615	"LysoPC(18:3(6Z,9Z,12Z))"	forward	518.3231003	218.12	22455058.79	645008017.4	535217405.9	541388842.8	246340747.2	419004906.3	262553785.1	199225458.3	200933335	207623591.9	202594128.4	24045934.79	22106949.95	165432520	94318793.56	71235596.76	6985117.461	57137270.95
616	"PE(22:6(4Z,7Z,10Z,13Z,16Z,19Z)/14:0)"	forward	736.4890795	171.478	4368379.038	6390237.259	4537535.099	2644429.296	1367971.143	3481932.906	4051452.187	2801936.447	1942087.097	1575839.962	2106621.16866667	722860.8825	584553.3606	1474644.732	363611.8215	516747.4239	666927.8764	1347288.152
617	Hydrojuglone glucoside	forward	339.1072774	259.578	2725963.184	3604363.397	2825651.549	3028752.453	3372496.058	1776227.719	2956421.749	2217624.174	2108598.69	2293434.418	2206552.42733333	NA	NA	3507123.536	825395.8729	623431.1017	1339122.681	1524944.693
618	Prostaglandin D1	forward	337.237056	86.4827	7627633.579	3659745.761	4583067.587	5625434.815	7071718.822	5525205.388	7919905.866	12946207.66	12390633.26	13071714.22	12802851.7133333	21799503.1	16999765.26	7221007.673	23800748.68	18354719.45	19423727.54	19786030.42
619	"(R)-(E)-4,7-Megastigmadien-9-one"	forward	193.1587245	32.034	4312395.244	5631330.867	7703234.975	4995587.446	5433130.814	7256626.775	6076089.143	5893032.3	6667319.261	4800795.167	5787048.90933333	6554420.879	6021465.963	5178494.364	3701641.41	4622158.65	3274907.085	8821538.558
620	"(3b,24x)-Cycloartane-3-oxo-24,25-diol"	forward	459.3839423	32.2682	12303143.62	15616050.36	13566362.99	12342945.6	15555775.42	13243435.87	13415480.32	12029659.04	13121451.54	13016276.86	12722462.48	12010183.53	11705256.15	18794419.04	11429702.95	11482799.58	12489632.91	20372661.99
621	"LysoPE(18:2(9Z,12Z)/0:0)"	forward	478.2935645	216.0075	5048489.883	14549172.23	26629228.13	6305702.553	32979931.65	9177281.965	6218402.243	5368559.748	5684724.476	5755725.734	5603003.31933333	11024963.37	1189458.923	37044912.75	4733556.653	3006870.046	13796150.97	2820794.076
622	Cer(d18:0/16:0)	forward	540.5352951	65.7676	194569.0777	NA	NA	92114.08036	91430.90528	NA	160733.6403	NA	238730.7987	250897.1799	163209.3262	1368004.734	1101559.139	852699.9281	613487.336	1421981.734	1535023.129	1277251.822
623	2-(10-Heptadecenyl)-6-hydroxybenzoic acid	forward	375.2892057	32.8709	3681400.463	4360546.077	1334163.432	5000544.392	4821879.827	2298151.811	4605506.675	3906253.893	4365310.657	4584874.112	4285479.554	4894875.336	6444605.278	5366152.413	3743751.987	4721219.298	5372955.759	6313067.877
624	PC(22:1(13Z)/14:1(9Z))	forward	786.5991125	66.9989	49033321.38	147505706.9	114478215.6	76836206.67	34645095.75	118698851.4	104459710.2	59152201.3	77517656.39	42150205.98	59606687.89	46870380.07	32522507.91	105500340.3	85761272.4	140855304.5	59512584.71	86689781.1
625	Methyl 3b-hydroxy-13(18)-oleanen-28-oate	forward	513.393697	32.4293	4887320.18	5523883.712	4409581.4	4773772.495	4660407.053	4151861.615	5125900.132	7538934.064	7663789.552	6347025.912	7183249.84266667	7825887.721	9105492.154	9525857.803	5287944.673	7638242.152	8080196.617	12631846.13
626	Ethyl trans-p-methoxycinnamate	forward	291.1949018	37.99595	8759333.644	8265455.337	6930650.077	7799091.54	8508546.891	6719641.8	8875470.16	21086088.16	16221421.5	17085420.84	18130976.8333333	40322536.84	28338819.48	18898566.47	24783123.47	26100550.45	25651708.72	25181093.26
627	"PS(18:0/20:2(11Z,14Z))"	forward	816.5737994	201.712	1400311.805	4998071.177	3381225.127	2226069.364	893540.4453	2840345.794	2590084.679	1171105.671	1324510.496	1300279.048	1265298.405	1301071.338	481970.4547	2543328.716	1313180.215	1111848.737	1778333.903	4822380.789
628	"DG(22:5(7Z,10Z,13Z,16Z,19Z)/16:1(9Z)/0:0)"	forward	641.5011108	174.93	174744.3494	3104498.795	3798867.658	1059062.8	484362.3958	NA	2089974.951	1401785.396	1406791.561	757908.6741	1188828.5437	407655.6163	352263.4553	NA	NA	960111.0073	72054.22899	6269009.098
629	3-Hydroxyphenyl-valeric acid	forward	195.1012969	100.394	571775.6577	NA	NA	410509.6249	NA	1104132.167	580821.257	NA	708411.908	2335496.176	1014636.028	2855287.182	2396114.295	284539.9981	4719527.956	2266952.963	3674881.992	1316520.788
630	PE(P-18:1(9Z)/15:0)	forward	688.5266493	165.4675	13363911.37	13734965.71	16607668.1	14656832.17	10471684.38	17560787.43	10854485.48	8571439	7899246.083	8787776.022	8419487.035	10204471.82	5884489.881	19985455.56	13807517.01	9701319.162	12668077.02	7987203.883
631	Peperinic acid	forward	183.1016215	33.9973	7803165.32	8852549.32	3621415.148	8167000.606	5996293.24	3820227.408	2580948.434	4073615.28	5008630.173	5001252.334	4694499.26233333	6805464.42	5217842.111	3425344.584	15978038.58	3999301.944	5025074.65	4382245.194
632	"LysoPC(18:2(9Z,12Z))"	forward	520.339346	216.939	223797902.4	462355092.8	377474656.5	340835084.7	167668025.9	372744083.3	164904329.8	207001681	203557371.9	206908421.6	205822491.5	58804947.05	43831155.7	285644021.8	257158156.6	186265776	121046421.9	82571297.41
633	Methyl 2-heptenoate	forward	143.1064495	35.1039	8626240.827	8781456.571	3205979.605	8733371.958	10027927.8	4222597.871	4341034.493	9671399.06	9212650.32	10201988.82	9695346.06666667	12364412.92	14069057	11459028.01	14125609.43	10842282.9	12788097.1	13703415.24
634	Liquoric acid	forward	485.3256238	37.4519	2825636.384	1995727.65	2000356.382	2498179.06	2412220.235	2230890.754	3286491.998	4754525.782	4839969.134	5472984.58	5022493.16533333	4966995.759	5232526.769	4381733.294	7005971.762	4937415.681	4599393.874	3701759.286
635	PC(15:0/P-18:0)	forward	732.591073	162.8915	2836975.374	2759319.894	4744884.867	5333915.413	2091872.249	4671941.169	3554439.183	2657458.55	3641633.205	3798275.196	3365788.98366667	9332606.326	3462890.37	11173299.99	9464566.711	10689139.04	8970422.07	7200783.717
636	"PC(P-16:0/18:2(9Z,12Z))"	forward	742.5761349	161.259	11958195.25	17507790.6	25345534.69	21414445.68	9216083.553	18175258.12	14655756.96	10981791.61	11698030.03	12028918.6	11569580.08	17924255.01	8383291.3	25518928.05	18596778.53	17930307.31	15889694.69	17503196.53
637	Abietinal	forward	287.23636	31.88645	7097852.412	7351202.445	6047540.201	7086838.026	5543324.269	6618890.738	7713329.357	6446404.748	6225622.632	7412951.582	6694992.98733333	6719430.492	8579297.213	7159631.071	6141556.575	6217048.105	6159282.428	8919675.34
638	Ethyl vanillin isobutyrate	forward	237.112078	21.5157	1930895.308	2224771.122	1440982.682	1863292.539	1847086.074	1888163.022	1032556.663	1253368.997	1323300.822	1332501.898	1303057.239	761504.136	430717.7436	1118060.674	367168.6568	533377.945	768414.296	1298659.005
639	CerP(d18:1/18:0)	forward	646.5169521	183.732	7992745.38	11964429.46	12143094.16	8536782.405	3809726.212	12217010.9	10784484.69	5604000.348	5510398.266	5103593.47	5405997.36133333	10876547.6	5998234.339	25076817.11	12094448.28	9891920.918	20276523.24	10412950.21
640	"5-Acetyl-2,4-dimethyloxazole"	forward	140.0704607	97.77135	12927197.77	10197146.15	13500951.08	11040513.33	8095770.398	14645565.29	12195622.88	15884113.06	15515968.73	16260425.48	15886835.7566667	16789869.24	18877225.64	11901101.06	14408395.91	19313614.49	17644206.99	13349707.74
641	12-HPETE	forward	319.2263717	50.3931	6287439.307	4944210.625	4840738.035	5080757.887	4666948.159	4882107.482	7314617.287	6733806.314	8246663.457	8265095.165	7748521.64533333	9387953.436	10574235.99	3783554.801	10346781.07	12109550.04	3689363.857	7654257.904
642	Capsiate	forward	307.1904106	203.246	2203966.723	3309688.463	2659003.191	3157813.347	2901432.812	3140911.268	3577270.482	6276338.425	6054301.418	5856980.127	6062539.99	8429406.317	6509155.433	8448637.059	9626659.611	9494967.277	10071811.77	6726346.964
643	"2-Hexaprenyl-3-methyl-5-hydroxy-6-methoxy-1,4-benzoquinol"	forward	579.4400709	32.6494	1955676.699	2221251.177	2099866.583	1751164.992	2378159.631	1407413.181	2334068.428	2831450.567	2976593.728	3380012.499	3062685.598	3952890.951	3031819.992	4489688.446	2632194.832	3205812.736	3323125.495	5033931.262
644	Tridecyl phloretate	forward	349.2730098	36.53945	149461697.2	254169047.9	153408497.8	172116079.1	145529646.4	140288186.6	202832633.3	74832662.29	72637751.42	74235592.44	73902002.05	25448519.84	30109999.54	28664469.71	23858201.8	24690620.41	27300472.68	35337609.99
645	PC(16:1(9Z)/14:0)	forward	704.5238861	170.611	32076448.49	44748813.53	21077447.88	14688319.7	20579875.17	24961254.63	34404461.24	19823453.32	20391522.2	21359741.31	20524905.61	16423605.13	12478896.71	25698304.22	14568422.43	37363743.58	20712069.09	25448783.08
646	PC(14:1(9Z)/16:0)	forward	704.5223306	57.5467	8825006.484	34107507.26	6944597.927	7936966.56	42752291.93	1072368.24	45556053.11	5186057.754	6726205.623	6290022.736	6067428.70433333	1641668.987	1399785.067	1181067.597	5148640.62	51178545.15	8660552.118	2132141.25
647	"PC(P-16:0/20:3(5Z,8Z,11Z))"	forward	768.5897357	159.6085	2693636.217	5706588.012	5945835.413	6412093.729	1391850.829	6588697.949	3626726.715	1787174.766	2371051.546	2159780.912	2106002.408	1879773.191	743998.2403	5240309.244	1887163.277	2683106.324	1318387.43	2680144.372
648	Laccarin	forward	195.110568	260.7365	15807606.48	32843923.19	23050101.73	22021856.57	40595696.48	2940337.758	24225095.04	791265.7092	669878.9812	9093737.037	3518293.90913333	9133685.182	3364557.135	27177566	14681576.39	4620400.088	6530924.865	10535786.17
649	"(R)-3,4-Dihydro-8-hydroxy-3-tridecyl-1H-2-benzopyran-1-one"	forward	347.2576223	49.2944	7238256.233	7396597.027	5430540.481	8320162.63	7571039.035	7219316.257	7662708.676	7874812.827	9334811.291	9614192.942	8941272.35333333	7997540.211	11424495.15	8777102.04	10071636.02	9243556.053	8560869.995	3393841.018
650	6-O-Acetylaustroinulin	forward	365.2675642	57.304	11799336.91	9595141.046	8457299.762	12376454.75	10113864.74	12274116.64	15382940.11	16376388.46	15531642.42	14915974.56	15608001.8133333	16910117.38	19652617.87	14479562.51	12313439.72	15170748.06	12727701.96	17006849.72
651	"DG(22:6(4Z,7Z,10Z,13Z,16Z,19Z)/22:5(4Z,7Z,10Z,13Z,16Z)/0:0)"	forward	715.5401621	151.978	9400418.865	8769612.671	19077116.58	14263186.19	20633854.33	3613937.554	21808089.38	5141358.787	5721681.386	5408071.123	5423703.76533333	2120403.48	3482396.348	10572100.73	8920826.22	7300834.759	6152098.619	3743324.504
652	"PE(P-16:0/18:3(6Z,9Z,12Z))"	forward	698.5132192	165.464	28320240.23	48657672.35	42208936.2	30448014.48	13767424.93	45034016.46	27040246.95	16170566.05	15391081.34	15642207.38	15734618.2566667	4104996.311	3306914.211	15685069.79	5229448.012	1048310.455	13377153.62	14272064.74
653	"DG(22:6(4Z,7Z,10Z,13Z,16Z,19Z)/18:4(6Z,9Z,12Z,15Z)/0:0)"	forward	661.4928584	66.76765	5367667.59	7037001.773	7427800.733	15886170.6	14584139.9	2866855.064	5134276.121	3599231.816	4797391.663	2742423.559	3713015.67933333	737474.3237	2003848.615	14641117.42	5978071.046	2041824.285	2262856.573	3685472.234
654	1-O-Hexadecyl-2-O-dihomogammalinolenoylglycero-3-phosphocholine	forward	770.6067004	159.4485	3083884.946	6168479.205	8040684.107	6544148.666	1378737.252	7353762.232	3096867.769	2701271.368	2841840.736	2640277.922	2727796.67533333	5059433.926	2154507.38	9062982.215	6053110.724	7376741.808	2502442.642	3038431.576
655	2-Hydroxycinnamic acid	forward	165.0545376	319.132	13424171.19	2893139.988	10302633.64	7324549.331	12775035.29	16284709.66	9625812.668	11833296.72	3122494.068	11472673.84	8809488.20933333	11292397.98	3741409.774	13442184.18	9850645.38	8948752.282	16232469.44	9498978.642
656	"LysoPE(18:3(6Z,9Z,12Z)/0:0)"	forward	476.2774534	223.285	52519029.12	132798663.3	73678286.41	52254760.17	45989252.45	49405525.8	805893.7194	30339043.04	29885605.59	27703022.92	29309223.85	5602587.149	3704377.749	19217785.41	8775026.533	7259510.257	8567078.461	10068022.6
657	Dimethylethanolamine	forward	90.09171575	271.945	6866966.115	19834927.89	20336710.67	6598623.863	5433927.552	6372225.248	5625524.027	3891548.854	4026127.666	3717009.665	3878228.72833333	16776188.49	2049486.044	16331741.19	14896691.74	17785510.4	18751971.34	16647327.14
658	Diethanolamine	forward	106.0864555	321.501	20181255.8	29312443.17	17627931.65	16235695.35	14087867.34	16054099.63	23193563.36	38393253.1	38895419.39	37703650.57	38330774.3533333	25141957.13	22462739.9	56408072.38	34060825.38	53758885.79	35319519.56	40367777.53
659	Ergocalciferol	forward	397.3465163	30.8634	9300191.377	21096972.56	596911.6868	15279843.78	21338396.2	15937280.93	16191758.31	9484839.002	10066625.71	10044299.75	9865254.82066667	6389527.054	6416163.383	9379092.214	6350889.879	5850518.189	7296187.597	9120421.431
660	beta-Cryptoxanthin	forward	552.429285	32.2314	42161519.95	49826833.32	41268088.84	53575103.61	38061591.06	38595630.4	41307439.46	18987449.93	23086030.18	19101941.12	20391807.0766667	1380573.356	1957097.419	1247928.832	1015013.706	1481129.606	1794115.15	795599.617
661	N-Acetylcadaverine	forward	145.1335285	324.217	5453475.577	10963761.67	2450030.942	3585047.799	4519010.198	6793762.947	7254705.53	5891529.935	6162544.896	5795168.452	5949747.761	3089358.959	5484685.507	6521242.25	2175405.911	2995247.907	3288458.836	9874441.88
662	Ganoderiol H	forward	491.372476	63.2114	7552690.316	6263247.789	6086680.489	7110907.706	4832793.439	6429329.206	8204502.838	3608271.959	3933542.14	3690976.361	3744263.48666667	1217387.304	850952.4332	2348298.839	2284718.434	2095312.634	1693769.349	624951.5487
663	LysoPE(0:0/14:0)	forward	426.2610495	221.131	9739201.427	5424391.993	3313109.028	918300.3343	43570629.78	2215043.67	20266028.98	8707162.607	8354820.175	8818549.758	8626844.18	3166957.048	3433046.035	13288524.29	1153040.307	19175625.49	2594477.634	1157003.16
664	"PC(15:0/18:2(9Z,12Z))"	forward	744.552383	85.7033	23823816.44	16375394.69	15337358.84	12332182.04	7217950.887	32189614.84	13403129.66	18863164.95	22809638.59	22310316.73	21327706.7566667	9312782.509	9094946.42	29912704.98	20545334	23131063.46	14273200.44	15803700.02
665	Glycyrrhizaisoflavone B	forward	367.1164355	37.1744	15979536.12	25709843.93	21592890.53	16632788.67	36688880.72	24742219.15	36110388.28	24042332.57	22400420.33	22708172.51	23050308.47	19612932.75	15873303.57	33170043.5	6259942.536	13087872.22	14288280	38436966.03
666	"DG(22:6(4Z,7Z,10Z,13Z,16Z,19Z)/20:4(5Z,8Z,11Z,14Z)/0:0)"	forward	689.5215194	156.101	31068962.93	60027682.84	89161520.93	83947267.36	49160375.41	20926677.7	49545321.88	26632749.43	29450846.25	28286491.96	28123362.5466667	16206105.1	26570078.05	50277961.53	58553867.14	44346226.35	42893398.04	41227328
667	"DG(22:6(4Z,7Z,10Z,13Z,16Z,19Z)/22:4(7Z,10Z,13Z,16Z)/0:0)"	forward	717.5541268	153.544	4063895.588	4796086.487	14731501.74	14119778.55	9198138.089	2511974.141	3838963.278	3865789.837	3894286.09	3672826.739	3810967.55533333	2402174.877	2932188.349	8643404.413	12956352.58	6981773.5	6706957.324	5022183.788
668	"2-Hexaprenyl-3-methyl-6-methoxy-1,4-benzoquinol"	forward	563.445689	32.3504	2541973.959	3419474.89	2395263.92	2569098.851	3291607.883	2568100.818	3130651.008	3106816.993	3714638.474	2865027.154	3228827.54033333	4148382.44	3480357.448	4652540.987	3457399.51	3666149.421	3411085.624	5307340.348
669	(R)-Salsolinol	forward	180.1019565	244.588	10366765.17	4616913.565	5526284.207	6573092.108	6360480.449	9371895.134	8429798.709	11520338.55	10145268.4	11850979.7	11172195.55	12207499.17	12458263.63	9383317.626	13877903.38	13488849.15	11881027.98	9021213.263
670	hesperetin 3'-O-sulfate	forward	383.041186	411.574	1063401.811	1398495.214	475244.1645	553894.4608	284182.0136	765615.8785	722239.1491	684475.19	691716.0258	669008.8212	681733.345666667	838758.4215	NA	948099.984	240266.3552	442650.1121	281856.4832	527735.5313
671	Austroinulin	forward	323.2575007	33.1671	4546681.763	4688962.706	1170035.076	8811849.687	NA	8765696.676	9940990.453	10614592.76	12066189.34	12121056.25	11600612.7833333	12508080.7	22066506.67	10966532.31	13709228.23	18817452.69	16047193.22	19068313
672	"(3b,6b,8a,12a)-8,12-Epoxy-7(11)-eremophilene-6,8,12-trimethoxy-3-ol"	forward	327.2165727	294.923	1820228.932	800206.6795	1401929.693	1977575.074	2202720.834	1804528.45	2679438.798	5854473.79	6011678.088	5665976.675	5844042.851	7217036.506	9512195.953	6702544.348	10677712.74	9671877.371	10330585.61	3550777.787
673	Formiminoglutamic acid	forward	175.071451	407.41	153307832.2	179238800.2	182716969.7	136887535.9	299407071	76501478.83	102007621.9	74373046.67	73365888.61	72434999.27	73391311.5166667	15551696.26	13814576.22	88849762.31	63022527.15	24369599.34	28609303.55	18452486.7
674	PC(14:1(9Z)/14:0)	forward	676.4920676	173.2	6694209.599	9453013.952	4885987.161	4247475.355	4263666.603	6080715.001	8876350.118	4297096.922	3442064.785	4630802.989	4123321.56533333	3056968.078	3168180.754	3906411.196	2297482.439	7114379.178	3256675.943	4481511.648
675	"PS(18:0/20:3(8Z,11Z,14Z))"	forward	814.5602187	201.939	407685.7789	2289367.8	1428579.306	1023180.117	436971.2029	1555828.655	1140099.036	547700.1686	570893.8883	539796.692	552796.9163	107822.571	98007.89322	344173.7072	83866.83703	204519.3076	604250.6873	2052188.644
676	PC(P-16:0/16:0)	forward	718.5767312	163.776	12929907.26	11067060.44	21086587.17	23046704.31	12439334.34	15033564.03	16475138.31	12008797.83	12508087.85	11551270.25	12022718.6433333	23945969.65	12758410.77	28400270.95	28134087.11	27663359.3	33872333.61	26039373.17
677	"11,12,13-Trinor-1(10)-spirovetivene-2,7-dione"	forward	193.1220347	36.69315	6601524.097	6217274.73	2742360.048	5981817.343	7323216.737	4077477.21	7493544.765	14925195.15	10274389.34	11409354.28	12202979.59	12565743.48	15242762.07	12131009.52	21097926.78	16899447.33	15391257.55	11019525.32
678	"2,3-Epoxyaflatoxin B1"	forward	329.0656096	107.687	3527873.736	5296438.201	2394128.217	2583829.578	2507222.232	7256211.832	4097328.58	4005229.016	3769343.906	3087515.521	3620696.14766667	6577613.619	4131112.936	3352561.162	3365896.611	7772140.899	4611441.603	6462206.303
679	LysoPE(20:1(11Z)/0:0)	forward	508.3394748	216.988	7805550.859	12564518.48	8331379.432	8286331.472	17938138.82	7527992.04	7557147.536	8258325.662	10071300.28	8105535.349	8811720.43033333	2006566.618	1444395.008	8737833.49	8805312.8	7351847.758	7635458.783	3512474.779
680	4-Isopropyl-3-cyclohexene-1-carboxylic acid	forward	169.1223769	64.0956	2316171.122	2992857.731	4432352.437	2832941.192	6026115.978	21339378.41	4579750.774	7581213	7306745.681	8644361.395	7844106.692	11555495.04	10722163.4	22297016.18	12113818.31	10868443	9371460.722	7734961.094
681	Leukoaminochrome	forward	152.0705388	305.339	1257643.039	5371542.651	2106973.091	3121472.557	2319893.624	3471938.216	3686615.648	3291973.523	3697090.385	3504039.858	3497701.25533333	4138323.589	11037846.59	3787206.676	4667338.143	4557584.232	3556633.411	2758282.842
682	"(3beta,17alpha,23S)-17,23-Epoxy-3,28,29-trihydroxy-27-norlanost-8-en-24-one"	forward	475.3413886	59.0221	3817734.323	2889478.371	1970844.769	4908390.418	3327880.714	2830905.114	6288965.425	4768055.475	4829457.437	5104894.286	4900802.39933333	4911788.943	6385062.751	4607247.413	4159817.233	5226916.533	5093100.198	4510801.144
683	"12-Oxo-2,3-dinor-10,15-phytodienoic acid"	forward	265.1795526	302.734	4152456.399	2955998.167	724622.5341	968859.1095	3570952.374	2656274.973	3384829.654	4880302.868	5492930.886	1050458.76	3807897.50466667	3384412.693	519524.6015	2873442.104	1488900.602	3192471.032	6380434.316	6877108.788
684	PS(18:0/20:1(11Z))	forward	818.5885616	201.809	3038716.599	9068094.118	5255520.238	4063930.468	1683891.322	4563898.258	4394334.135	2696378.414	2948446.773	3081542.546	2908789.24433333	5063401.646	1774840.967	8030044.536	5435214.827	3894744.898	5998781.861	10988931.22
685	LysoPC(16:0)	forward	496.3396341	217.5855	263458578.6	450600585.2	441056546.5	405135836.9	209876363.3	415471480	197128214.2	205555105.7	206374274.3	237705652.9	216545010.966667	50443336.52	45613532.43	239832907.8	208603463.9	160977864.2	129766327.1	86161500.67
686	Macrophorin A	forward	361.2365474	38.2818	4800619.361	3809570.325	3150927.657	1358040.215	3885858.19	3204669.03	3522908.004	9187843.183	1901635.359	9740713.501	6943397.34766667	9038170.772	5619959.222	5849055.241	9847003.207	7486649.538	8285109.362	5113420.015
687	PC(P-18:1(9Z)/16:1(9Z))	forward	742.5749546	65.0474	537236.4447	NA	4475656.558	4759579.121	1604032.781	2392372.531	2723910.406	1645134.328	2360025.379	1902186.866	1969115.52433333	3013793.417	2340242.932	4221209.03	4928231.614	4770550.895	2374766.046	3922626.229
688	Methyl 2-(10-heptadecenyl)-6-hydroxybenzoate	forward	389.3052283	32.8474	3471632.022	4312010.694	3607471.223	5234845.662	3603472.546	4042774.816	4687012.699	5149075.716	6162215.399	4913284.424	5408191.84633333	6277329.56	6212304.682	5226806.209	4807993.196	6714626.458	6568271.426	8334290.758
689	FAPy-adenine	forward	154.0721208	183.531	7515582.67	5247198.394	8155293.511	8161881.384	8157037.887	14694740.58	6174086.657	8909734.743	7981594.618	7001985.861	7964438.40733333	6947300.749	7137765.992	4613949.045	6045201.78	7801282.222	5319693.063	6283236.426
690	Tyrosine methylester	forward	196.0968894	46.7659	19960486.67	12624455.15	9026945.335	15309270.29	9810512.266	17292859.73	8578745.588	10333751.12	10057679.39	14930610.65	11774013.72	13405467.51	13593708.97	9849043.082	12145316.4	7919193.03	16104326.3	11139635.45
691	5-Aminoimidazole ribonucleotide	forward	296.0658943	406.935	15908023.45	26933306.68	31958033.01	21130922.77	83312625.25	19964555.13	11721331	7201487.889	7241254.531	7148236.907	7196993.109	282281.2472	367242.1014	4601958.864	4307877.139	1052383.204	1308012.687	488815.7986
692	CerP(d18:1/16:0)	forward	618.4848571	185.358	2196763.112	5398027.048	3205474.175	3592663.118	1054683.903	6008351.975	2719615.341	2084557.347	2062543.284	1783651.903	1976917.51133333	2023879.528	1760690.782	9238665.726	2469069.558	3425207.283	4863008.648	3309131.789
693	gamma-Glutamylleucine	forward	261.1442897	372.695	4404400.941	520600.7999	523345.1225	2782386.576	4269330.399	931390.5755	5579549.43	2578973.747	1402255.505	2756764.215	2245997.82233333	858421.4802	204271.3432	134099.3936	957237.9212	509235.1606	1701859.318	1361625.269
694	PC(16:1(9Z)/14:1(9Z))	forward	702.5054554	171.472	10633683.45	13686050.73	9718699.304	5857881.836	4743472.16	14285929.07	12426847.01	8274973.473	9247468.418	8995214.888	8839218.92633333	6719098.728	8384008.854	12152087.46	5827808.081	11649108.55	7032099.132	13501217.71
695	2-Aminoisobutyric acid	forward	104.0709016	130.163	3951826.666	6214777.664	3774451.3	3604337.397	1721156.296	3925246.981	4159495.26	7778450.557	8728930.182	9277546.973	8594975.904	19484315.55	11866016.39	14461084.46	11110664.72	20300622.94	10881853.44	22925314.16
696	"(6E,8E)-4,6,8-Megastigmatriene"	forward	177.1637196	32.21375	12480385.79	14575544.18	13800914.28	14461450.33	13251224.14	12789154.31	13928220.93	9976255.809	9621828.879	10430355.25	10009479.9793333	5580549.129	6122516.95	7842334.698	7752192.323	7108656.544	7788662.301	12808002
697	9-HODE	forward	297.2420051	45.67335	44595540.91	28355309.25	37194893.43	40838042.47	25734292.9	60898871.92	45383186.2	48567780.25	50183721.49	49992789.52	49581430.42	50129989.99	68628674.78	27153176.25	42478610.54	4026347.724	50733743.12	53206009.05
698	Avenoleic acid	forward	297.2419778	62.90845	60232873.18	33262394.2	53504574.66	66718156.21	37933345.99	88142639.32	83625270.39	72936670.21	75891699.64	74295463.68	74374611.1766667	85583230.58	132240031.6	47274318.33	69450979.37	75123652.31	84993213.06	87957255.4
699	Tetracosahexaenoic acid	forward	357.2779936	32.81945	3388581.079	7179146.736	7018520.504	7313406.529	7004214.979	6738427.455	7079664.906	5322395.203	4030601.411	4324696.112	4559230.90866667	6480584.165	5846733.501	7179210.121	5849803.123	4956764.326	6069733.432	8393951.951
700	Polyoxyethylene dioleate	forward	591.5337023	59.0258	904155.8974	1460949.174	NA	NA	1952025.624	445636.4333	1995062.2	677516.0546	538678.5916	851243.5644	689146.0702	843347.4258	444759.8168	646546.4832	220807.5938	3452714.556	710773.0827	680648.7179
701	Uvaol	forward	443.3889191	31.88645	12507848.61	13723893.46	13499046.33	13017063.68	17586015.28	10427249.41	14046118.93	9936016.831	11256463.68	10797769.69	10663416.7336667	12784406.27	8169375.985	14639300.04	8190376.816	12000318.27	13871804.57	13314466.52
702	PE(15:0/14:0)	forward	650.4748882	152.469	7387680.859	31561325.73	16642155.89	19687681.59	11122899.09	33344584.46	19019707.72	10737596.28	6551870.19	16788849.9	11359438.79	10774530.22	6581341.237	6133173.225	6951617.45	35687892.95	9098683.264	27263093.97
703	Aflatoxin M4	forward	329.065474	50.99475	6691346.659	6253847.742	5291886.546	5599145.503	10917698.62	6146038.328	7128105.986	6265804.453	6712963.387	5963795.78	6314187.87333333	10888310.44	5579583.512	6076470.32	5543592.926	7033485.256	7781710.139	12733272.77
704	1-Methylhistamine	forward	126.1025748	241.0895	17074326.4	18688956.31	13513656.09	7319970.46	18967491.71	8311053.334	15723214.9	5719240.084	4867948.295	5613727.942	5400305.44033333	1782731.925	1799116.775	6096127.167	2998241.877	1255369.611	2732238.021	667089.6641
705	Norpandamarilactonine A	forward	168.1019593	270.8185	3290676.909	1636298.091	2744230.587	4796457.336	2580075.228	1834463.838	1842444.868	7637239.007	8055176.7	8110679.183	7934364.96333333	15550702.29	16660517.31	12458620.58	16815709.82	8421706.42	19693027.66	9277422.77
706	PE(P-16:0/14:1(9Z))	forward	646.4808288	168.069	21498848.65	26973523.09	13064831.29	4214025.493	17515540.3	12920292.01	36939447.63	8528778.976	9834944.901	8858423.003	9074048.96	2246130.342	3776234.814	8333779.314	2851446.718	8267761.197	7426935.848	4197273.677
707	Tenuazonic acid	forward	198.1124359	245.551	4290718.126	4697272.751	3131234.841	5591860.065	3790431.176	6002731.009	7825772.921	9359675.128	10554399.99	9797115.772	9903730.29666667	14175776.06	13391919.07	8460218.943	15392137.16	17298012.42	11504570.81	11910938.78
708	Glyceollin IV	forward	355.1537247	31.76765	15115698.72	13747407.86	5692501.606	4606327.419	2327046.584	6361607.035	4338591.281	5053566.965	1624731.63	1820400.75	2832899.78166667	11400945.83	5041059.845	4088197.934	9720971.936	10206260.18	6948671.03	18384951.97
709	8(R)-Hydroperoxylinoleic acid	forward	313.2365051	55.3912	16139511.9	12082655.68	12905042.64	27265621.83	10769273.54	16110537.08	28093781.41	27443721.07	30743485.7	28971238.12	29052814.9633333	39655485.68	49941609.19	25851944.34	23810072.77	34573196.75	33343292.55	37816808.47
710	N-Acetyl-beta-alanine	forward	132.0656432	172.282	5308511.277	5125257.385	4763912.121	3974021.875	4374441.707	5668867.079	7502052.415	4008607.841	5152194.051	5327286.65	4829362.84733333	6862709.258	3247114.762	5992669.89	5493736.812	5510177.347	2117269.776	4660801.557
711	"5,6-Dimethoxysterigmatocystin"	forward	385.0918919	25.6935	1803465.985	1494307.823	1514831.153	1926378.631	1708724.458	1175708.207	3840842.57	1153740.998	1289704.188	1361472.316	1268305.834	835116.1849	1165037.414	1195207.786	1223291.036	844228.4785	991389.9027	898464.1978
712	Jasmolone	forward	181.1223519	87.7176	2736428.382	1640055.223	4099608.023	2289600.579	2545725.833	1629172.365	2775101.743	4314808.474	3988720.533	4245382.57	4182970.52566667	7220512.95	8258845.01	5292048.001	12643220.26	7694440.54	8654977.929	5408910.646
713	N-Carbamoylputrescine	forward	132.1132684	406.529	130322977.7	95694751.09	65847508.97	67599516.57	59185055.28	141699868.2	114249200.5	87477079.56	87980501.95	85873133.99	87110238.5	55148163.7	17123192.9	146286721.7	48149144.37	45858864.82	77526579.16	102007336
714	1-Phenyl-5-propyl-1H-pyrazole	forward	187.1229884	121.673	1399630.676	1523927.338	1084142.991	1251658.291	2491477.52	10590400.63	1402082.659	29360529.31	29368119.86	30403695.07	29710781.4133333	130333771.5	63795436.7	88489572.82	42976634.05	13085047.81	19105417.67	49462329.99
715	1-(3-Aminopropyl)-4-aminobutanal	forward	145.1335332	253.998	8326852.838	7551559.691	15093190.04	7705666.774	17482412.86	5780153.871	7785591.17	3890445.213	4038544.499	3507493.248	3812160.98666667	2370649.045	989611.0467	3595101.022	4679694.142	4305601.434	4136775.287	812618.4216
716	I-Urobilin	forward	591.3178801	302.6935	1696805.159	323292.3879	1567943.355	2402034.089	729666.8759	704730.2566	1691824.748	703769.3016	651308.9104	647892.5365	667656.916166667	141335.1982	NA	48359.64971	105439.2795	112299.9577	121225.2759	29438.43118
717	6beta-Hydroxytestosterone	forward	305.2109123	38.3109	6503275.95	4965114.138	9527919.868	6021622.938	15145724.79	6228179.636	2576973.691	7949958.39	5301394.527	8787308.898	7346220.605	8817400.554	2872852.972	9601038.604	10136558.96	9546193.207	7872891.182	7372197.688
718	Cappariloside A	forward	335.1237654	196.9485	1000442.024	8037556.48	8582033.995	1175741.6	11742078.35	1200480.895	12709614.92	9179584.111	9440184.109	6602287.482	8407351.90066667	9187531.623	6226141.154	4288826.604	5609526.404	8699282.932	7839546.191	6731820.89
719	Squamosinin A	forward	623.4530608	178.367	2429143.153	8495295.673	5037525.993	5243167.956	1742302.514	NA	5594278.473	14348049.46	15470560.88	16260467.76	15359692.7	95404476.15	10882347.36	6173341.3	59960.61051	48618940.38	1156033.412	16608340.05
720	"6-(Hydroxymethyl)-2,4(1H,3H)-pteridinedione"	forward	195.0530083	335.787	48366358.39	27980073.76	30245945.6	33488584.86	30387198.36	18906117	37296559.89	29837772.6	27970368.51	27514618.85	28440919.9866667	5722779.224	19510424.26	21426519.01	54474120.4	25959525.36	13014694.46	5690828.136
721	"MG(20:4(5Z,8Z,11Z,14Z)/0:0/0:0)"	forward	379.2831068	33.3252	3106638.098	3126950.509	3540697.604	2662255.353	3974926.055	2359824.304	3010933.364	3355378.947	2487323.507	3313590.612	3052097.68866667	3463207.003	5020183.095	2308387.841	3989547.346	4276874.76	3086829.475	5590269.259
722	N-gamma-Glutamylglutamine	forward	276.1188324	430.2355	2824387.897	NA	2554760.022	1176308.47	1108333.609	2513580.73	2448495.645	2171993.808	1744044.417	1882907.357	1932981.86066667	1243528.526	843610.6133	2224400.988	200419.7954	989927.6626	7147316.61	1018096.17
723	Aflatoxin G	forward	329.0656065	136.989	8897753.357	8023847.006	7387863.656	5380140.259	9410456.511	8955918.043	11688755.58	7965741.569	10106015.44	10994201.19	9688652.733	11304026.21	8574609.005	6978644.728	6337673.368	13770100.97	12087693.5	11915975.28
724	"(2beta,3alpha,9alpha,24R)-Ergosta-7,22-diene-2,3,9-triol"	forward	431.3525605	31.7106	15778192.74	19434091.57	18781160.81	14786816.39	18388202.84	14121380.31	18770693.09	17332400.89	20647660.36	18107239.33	18695766.86	22431478.26	21985624.79	25787474.77	20183842.33	20026907.88	20548689.7	35420595.38
725	2-Hydroxyclomipramine	forward	331.1551781	229.1075	1791750.345	1429149.831	1752330.925	1207716.921	1628713.51	1419823.938	1452503.407	2503524.503	2665620.163	2257635.305	2475593.32366667	1099667.247	2365756.314	1443433.889	1324174.313	1684371.256	2672070.047	1797943.434
726	"1-Phenyl-1,3-heptadecanedione"	forward	345.2786704	32.3078	8882449.118	9890102.789	9000964.412	10327928.46	9087944.296	9161295.665	11166812.72	9690672.619	11344062.28	10995568.43	10676767.7763333	12867680.21	13933066.29	13070792.74	10579837.28	11544552.72	11927672.18	14757357.58
727	Tsugaric acid B	forward	529.3877889	33.1252	2235117.588	2042913.193	836089.7542	1759978.611	2326861.966	945369.9121	2748307.788	2923192.865	3491638.201	4204454.228	3539761.76466667	3997862.3	4914485.702	5278061.215	3118271.255	3969621.277	4250555.054	5712808.994
728	"2,3,6,7-Tetrahydro-6,7-dimethylcyclopent[b]azepin-8(1H)-one"	forward	178.1224575	33.6876	12233973.73	9784988.934	30583555.94	573466.7019	29732346.89	8411595.735	18446269.73	15347955.49	16040824.58	15494533.37	15627771.1466667	10314972.87	11442947.79	15498749.36	24466244.28	9522774.115	23514679.75	11509488.92
729	Citreovirenone	forward	249.1119748	21.5701	2164099.618	2758682.702	1628659.77	2865020.898	2740238.234	2366346.407	1452209.934	1337446.406	1482087.317	1511273.933	1443602.552	770105.5145	504346.2711	1126901.389	378272.3361	401849.8055	706797.2969	769331.802
730	Phenylacetylglycine	forward	194.0809866	238.201	11538182.78	8071770.206	12310898.46	15098362.94	7615876.042	14619839.5	12504786.73	14589065.38	14657716.88	14560044.8	14602275.6866667	17558991.12	16345579.22	7953258.482	23572066.93	11947943.02	11950770.44	12477842.14
731	Corchorifatty acid D	forward	309.2050253	38.75085	8850729.153	18637387.62	21558751.76	17692410.22	26121780.75	17996451.71	20457872.86	29763523.71	31888100.45	64273796.79	41975140.3166667	16275344.07	27257001.3	27438111.22	42865758.14	42433540.1	35428984.07	29383514.76
732	L-Methionine	forward	150.0582913	101.1683	7517171.75	2257675.735	4385880.64	1786868.419	2391703.179	4095786.801	8709954.047	10414193.95	11167555.17	10897993.85	10826580.99	8475766.005	11296402.31	25314595.43	4996241.736	14598714.54	16518047.82	6728509.158
733	"(E)-26,27-Dinorergosta-4,22-dien-3-one"	forward	369.314812	32.08385	4160925.595	5717040.625	3484885.189	3621023.898	3857152.126	4667905.6	4720412.307	2771474.058	3375630.949	4283309.816	3476804.941	3111238.742	3385673.489	3681103.583	5235581.313	2770928.004	4486120.244	4689812.334
734	Serylisoleucine	forward	219.1341084	280.2315	22423227.15	32740009.52	32645409.48	29154312.3	28019916.17	10619384.63	29195217.8	9831868.705	10044121.12	12205534.99	10693841.605	2551527.148	3918873.526	4291783.976	8772474.424	2282472.916	3495922.556	2993903.06
735	"MG(18:3(6Z,9Z,12Z)/0:0/0:0)"	forward	353.2678069	55.89035	7348889.492	7876588.532	4948565.104	6377054.733	4632143.176	6066312.552	5897878.44	3833494.956	4065293.196	4910833.129	4269873.76033333	NA	NA	2500435.068	NA	NA	NA	1206817.471
736	2-Acetylfuran	forward	111.0441933	124.0665	1441938.318	1816291.731	NA	2812544.418	32975772.25	91058468.67	2900385.93	12961504.53	12318377.16	11550879.24	12276920.31	3636467.197	5064382.337	5880971.173	10124398.92	6249149.486	3254983.854	3418037.107
737	"3beta,7alpha-Dihydroxy-5-cholestenoate"	forward	433.331401	36.0286	5651564.812	5251541.514	5091846.125	6996075.686	5283973.52	5567251.67	7182184.907	7506546.762	6397994.833	7717456.408	7207332.66766667	6537145.412	9842328.461	7663132.653	6662438.16	9913481.946	6271696.463	6549113.357
738	Guanidoacetic acid	forward	118.0652155	71.97435	7926217.681	6889147.471	7628909.613	6001847.391	8456804.824	11503191.36	14446165.85	7528012.27	7457201.007	7708955.974	7564723.08366667	10327870.89	20678514.14	7154971.838	11419124.84	7973929.871	8728399.123	19943433.16
739	1-Methylnicotinamide	forward	138.0772433	6.099585	4457020.658	3978415.628	3781021.669	3760355.517	3954379.429	3892947.989	4222851.563	3474041.472	3743662.358	4042891.241	3753531.69033333	3783976.758	3807275.149	3940697.666	3459177.892	3834468.036	3464683.522	3895983.172
740	Carbadox	forward	263.0763402	410.696	3872655.738	3663362.721	7965439.465	4801299.28	5140011.912	1187406.077	1695928.469	1964830.963	1833005.613	1739672.96	1845836.512	151762.4486	375733.8468	2587896.559	2200072.385	855871.4075	885891.0454	351386.9651
741	Santene	forward	123.1169081	32.261	19745917.57	19107514.55	21856980.69	22793662.54	22948489.31	16004694.02	19793000.71	13199461.73	15712092.85	15356628.11	14756060.8966667	10274182.36	11916189.83	12373738.96	12741241.88	11190972.11	13608951.1	18274892.08
742	"1,1'-[1,13-Tridecanediylbis(oxy)]bisbenzene"	forward	369.2784371	34.1956	4425742.612	7316199.409	3200761.96	2186721.613	5357785.136	4008088.621	5977190.299	3744123.089	4068875.531	2764755.335	3525917.985	3758502.7	4449530.199	3057107.107	2455432.755	3842538.657	3780813.882	5969492.629
743	"N,N'-Diacetylhydrazine"	forward	117.0660484	355.173	21186375.79	70803173.3	15538376.42	6891096.369	7322714.149	1844944.995	4788418.091	77048169.26	73702370.98	75249970.94	75333503.7266667	209524484.5	232378971.9	517190009.1	416639533.7	249818270.4	288875503.2	249442094.9
744	Metanephrine	forward	198.1128088	217.237	1231246.431	NA	76405.7709	355804.1492	216035.9094	237770.0707	418950.8445	354843.3642	362205.0307	429417.4829	382155.2926	421789.9938	560820.9404	273527.9065	531136.4328	583489.4457	585949.5018	388557.6634
745	Isoquinoline	reverse	130.0611819	18.3696	471454.0832	339098.6828	416941.2672	435311.7524	544768.3513	393405.8719	409250.8151	484336.6809	418399.7352	432524.5562	445086.990766667	477626.717	452672.9583	485313.7766	396548.0858	462080.8052	503082.6541	422763.9443
746	L-Isoleucine	reverse	132.1018992	22.0923	445535.8214	1018998.204	885241.2231	476435.3408	372081.9107	422134.8858	488637.9865	2331690.303	494820.2827	382116.5742	1069542.38663333	481994.4999	348090.4721	302323.0142	635300.3207	478214.001	849965.2347	1167334.119
747	L-Proline	reverse	116.0707283	11.959745	436950.2957	336814.5583	393762.1458	429354.4825	414971.6246	457644.1321	416070.8633	458549.2882	374359.2433	462034.0857	431647.539066667	356827.0376	445555.4972	233868.0911	414355.8735	359176.5986	717833.7169	281781.4583
748	p-Xylene	reverse	107.0857196	33.3333	28119223.72	26189723.32	26551359.71	27380193.27	28533102.88	25537855.29	27082059.01	40720596.3	32310676.4	29892742.04	34308004.9133333	46428773.1	35404383.14	29594070.15	42500602.98	46858004.8	37647511.11	33772193
749	PS(15:0/18:0)	forward	750.5274886	204.987	765740.2832	3344343.288	1118998.866	1245890.508	594838.8986	1623561.991	1158843.271	659177.5623	768213.7311	664269.267	697220.1868	1105139.15	430699.3503	1883349.034	941702.1856	1072583.033	1861766.733	3127781.024
750	Acetaminophen	reverse	152.0705655	18.7536	1054466.746	1130738.039	1119220.944	1075349.77	995070.675	1058449.574	1097616.252	1049217.708	1030517.198	1036442.152	1038725.686	1042356.545	1167824.316	962750.6884	875829.0492	1005515.307	720656.7239	1044963.783
751	O-Arachidonoyl Ethanolamine	reverse	348.2975854	31.658	1440268.06	1664285.99	147746.0691	7140245.319	2294186.879	1170453.479	1624960.772	1869060.275	2324374.339	2143645.621	2112360.07833333	3187247.464	2982337.018	2753483.02	2460451.083	2710288.441	2741601.592	4001921.682
752	"2-Methoxy-3,5-dimethylpyrimidine"	reverse	139.0864138	6.103575	1909739.181	1526332.414	1732763.013	2605335.71	1567641.673	2831160.643	2378074.757	2659387.5	1230707.962	2982884.044	2290993.16866667	1741370.958	3422662.951	1856140.953	3186823.117	2026965.369	3179238.786	1989187.458
753	Gingerol	forward	295.1896589	91.20135	2783096.978	1753684.597	1493815.176	3703861.843	2388750.16	8687055.697	1718610.663	4149372.362	5166051.182	4007756.924	4441060.156	21588157.83	6296817.33	4405638.319	7673135.445	6004816.745	19032234.02	4769448.426
754	Phloretin	reverse	275.0911648	28.10705	154690.8679	154537.9282	151097.9862	131065.917	123332.0875	133989.6288	154232.8929	156515.9998	115072.5987	137334.7825	136307.793666667	83337.36377	74506.49255	75331.02082	97224.23551	81830.62207	67363.85678	96115.97007
755	Mesalazine	reverse	154.0496684	18.6164	1134410.963	2537921.577	2159264.294	1182848.734	2118196.086	1949192.321	2116235.975	3024943.809	2365001.805	2064660.113	2484868.57566667	1342992.923	1985143.266	1896144.541	1290432.161	2157317.012	2369876.574	2442193.892
756	2-O-p-Coumaroylhydroxycitric acid	forward	355.0694056	31.5916	379410.9945	146162.8387	428673.3493	213798.5328	393285.6992	396858.5194	265560.0175	31368723.74	48669775.46	50949592.3	43662697.1666667	256174.2498	394148.0551	963368.174	442195.4979	439441.9706	596935.119	166002.2032
757	"Spirostane-3,6-dione"	forward	429.2991963	59.9075	6051059.852	3840271.382	5117336.206	6688590.83	5805077.739	4455210.539	6185838.409	5410322.765	7103131.223	5342895	5952116.32933333	4496392.4	5992975.232	4455082.766	5914076.097	11339232.28	5736140.542	4723665.046
758	Maltoxazine	forward	180.1019529	227.4795	2002801.293	2432405.366	9497352.06	907498.2418	5385283.057	2628216.519	1546837.673	2690087.405	1745673.153	2514915.587	2316892.04833333	1680794.999	1897977.441	9437653.41	1805797.702	3729621.757	1516214.831	2141080.636
759	3-Hexadecanoyloleanolic acid	forward	695.5929831	149.49	1004506.903	7221560.887	NA	NA	12305058.16	NA	8580129.512	708781.8073	1104649.306	1238814.496	1017415.2031	72057.50805	170041.4449	2882575.363	NA	NA	75000.7414	395425.2835
760	[10]-Paradol	reverse	335.2575076	31.6397	3233448.267	4736575.165	42478.87781	4344337.534	4410785.845	2675777.326	3067680.625	3532660.681	3004444.168	3304732.723	3280612.524	3598681.862	4300380.791	4405015.472	3553271.397	3560000.908	3991652.794	4522736.157
761	"2-(1,2-Diamino-1-propenyl)phenol"	forward	165.1023361	232.253	1213781.925	1413506.948	2054390.955	3804969.76	2030913.415	1288989.022	2238892.53	1986202.303	1788879.853	1841355.562	1872145.906	1119914.704	1160756.505	1168284.002	1229104.58	1313422.852	1264054.506	1486718.851
762	1-Formylneogrifolin	forward	357.2417507	41.7245	1707644.75	1244183.445	1068220.11	497898.4385	792658.1575	NA	1206875.759	3206935.235	1572156.77	3992602.839	2923898.28133333	3314723.655	4943106.129	1709012.016	4857030.821	3135773.13	2544789.535	2553752.696
763	Arabsin	forward	267.1587344	36.3066	5756730.823	4189682.063	3477384.518	1699242.772	6132458.841	4949819.751	10384468.44	16300982.64	13105086.82	15251098.84	14885722.7666667	24435402.98	40537376.82	12561789.19	34845625.38	21978214.84	26349996.8	31422634
764	"MG(20:3(11Z,14Z,17Z)/0:0/0:0)"	forward	381.3000436	51.94605	56252526.64	70150227.37	43610706.24	60688642.21	54038598.72	45549845.34	48756074.7	23807753.23	25685322.77	27473837.1	25655637.7	7850204.191	7630971.043	5315864.539	8250053.695	8621727.721	7444420.103	7426450.406
765	PS(20:0/15:0)	forward	778.5578584	204.143	838826.8831	3284521.437	1911407.748	2554429.948	997717.492	2835952.564	1511960.485	1226613.533	1260263.448	1112952.153	1199943.04466667	2538529.272	552916.857	2682714.213	2364499.657	2022119.016	3004296.218	5101503.377
766	"3-(3,4,5-Trimethoxyphenyl)propanoic acid"	forward	258.1347023	178.377	21082311.47	118271164.6	101520405.6	28471625.34	43435362.58	42285941	18541088.79	18767761.64	20840345.27	19442545.21	19683550.7066667	31554744.45	4586091.726	32604588.77	5676397.195	4185415.809	26988872.86	16508027.37
767	Neobetanin	forward	549.1354751	414.102	179345.6121	391665.1859	311114.0199	75250.29498	473655.4839	562672.1876	693823.1271	352898.0325	296539.2127	309303.2396	319580.1616	262262.6087	126235.7041	402362.2006	208394.9709	420778.3861	NA	99640.01393
768	Geijerone	forward	179.1428197	34.989	10549656.04	10056620.41	6443625.954	8762748.567	7910345.361	8641379.585	10621698.09	10860951.18	10695364.84	10071800.63	10542705.55	10006693	12727141.15	9474036.759	7454164.149	11943452.8	10597781.51	11942682.92
769	LysoPC(24:1(15Z))	forward	606.4488662	173.179	7935362.446	9032270.926	6575192.428	16349924.97	5903531.725	8526604.035	8694505.893	6487629.026	5883924.818	6155416.881	6175656.90833333	2465538.464	2151210.594	16977510.11	5049037.069	4499070.107	3397066.567	11583167.11
770	(R)C(R)S-S-Propylcysteine sulfoxide	forward	180.0690646	84.29955	33425266.13	4842065.244	12744036.19	4039799.608	4447381.435	24677683.69	6036264.948	11500906.47	12927392.76	12218778.52	12215692.5833333	6509064.522	4790961.181	7156222.299	5299738.061	3888038.776	7885479.182	6533022.795
771	PS(16:0/16:0)	forward	736.5134606	205.4845	304043.5308	1980118.594	392354.8085	556110.5594	183111.9007	887297.2363	466164.1915	373230.1509	320838.34	365618.28	353228.923633333	406312.0943	157246.4008	1047937.039	510351.5209	343325.6227	1115110.606	1305237.467
772	Gerberinol	forward	365.1021715	201.23	835097.8706	960380.9765	708107.5507	887339.7984	940484.7501	693560.0383	1197222.809	1259337.68	1330175.606	1339502.403	1309671.89633333	1642057.573	2019017.614	1284160.348	1921631.864	1246393.523	1408895.264	1320649
773	Panaxytriol	forward	279.1954387	55.4724	4007210.08	3630402.81	8101490.565	5700345.119	4297483.697	7321878.863	6109706.129	5286580.775	6610943.275	9355340.57	7084288.20666667	7669988.752	12167284.23	5837079.796	9444218.494	7570796.028	7637799.56	7452091.436
774	Cohibin A	forward	549.4884507	171.5025	2299048.85	3829843.834	1173396.964	1015233.31	3028767.829	2275371.733	4947847.199	1833906.197	1765112.779	2229038.723	1942685.89966667	1479231.551	1134975.99	2280713.782	1230873.353	3118306.289	1962301.155	1760024.71
775	PS(14:0/20:0)	forward	764.5426327	204.17	427100.626	2075203.049	1245218.499	1260028.691	817367.1458	267303.9831	1030772.066	919054.1178	918995.0501	834948.541	890999.2363	1708608.795	536120.265	2447817.307	1432589.114	1988206.015	3079375.116	3959106.99
776	"PC(18:3(6Z,9Z,12Z)/P-16:0)"	forward	740.5607669	162.113	15032383.29	21768360.89	21422675.9	18682330.18	12213506.19	19428710.8	20570457	8676044.192	9090323.387	10440712.01	9402359.863	4802624.552	3471559.154	10119056.08	5493714.942	5432532.727	5217705.11	9934399.572
777	2-Arachidonyl Glycerol ether	forward	365.3047924	31.5236	4508170.213	4311833.261	1185805.314	4393554.4	3327170.28	4209092.707	4206664.053	6638266.014	5900108.028	5960461.712	6166278.58466667	7940947.565	8566744.04	7627276.656	6400781.774	7790510.696	7912053.336	10525915.69
778	Oxidized-adrenal-ferredoxin	forward	184.0969328	234.307	3277910.367	1970943.116	1829135.983	3597291.214	2813598.159	2917216.516	3578820.473	4243498.943	4609677.154	4456041.158	4436405.75166667	4894670.218	5100632.039	3662810.875	6465313.964	5973012.346	5409622.727	4074873.021
779	PC(14:0/P-16:0)	forward	690.5425673	186.119	NA	NA	102736.0771	NA	NA	122943.2273	96723.61518	NA	NA	NA	0	38383.27466	NA	360107.797	46089.81838	203002.1456	579695.7651	435277.8954
780	Panaquinquecol 2	forward	277.1796081	47.4239	13122156.23	27987433.95	7633041.102	17764333.72	17887250.69	17014697.48	14533874.55	10554780.09	10064504.82	10191137.3	10270140.7366667	10014765.03	12426114.1	8948296.153	11665062.52	10429021.83	5925682.428	9430510.639
781	"2,3-Dihydro-5,5',7,7'-tetrahydroxy-2-(4-hydroxyphenyl)[3,8'-bi-4H-1-benzopyran]-4,4'-dione"	reverse	449.0875119	26.22485	56463.83031	86329.08475	26005.55785	58279.80996	28409.62557	54994.851	67705.74513	92376.15694	64668.57949	68394.49023	75146.4088866667	37949.21659	45876.45115	76605.42255	62007.35506	71639.27903	51939.12021	50596.08691
782	Isovalerylsarcosine	forward	174.1125758	36.68835	6343447.692	14795865.84	7839783.518	11628305.64	5329826.854	9282859.261	8473146.374	8795510.826	8504164.156	8868185.513	8722620.165	13848246.81	11481545.81	9219464.418	15845192.01	17240789.23	6826283.805	9793094.02
783	(4E)-1-(4-hydroxy-3-methoxyphenyl)dec-4-en-3-one	forward	277.1799089	62.4594	12802176.14	11700468.03	9650861.36	22753989.35	14146023.36	22744839.27	19352279.98	7324606.555	10993061.99	8341577.892	8886415.479	8549415.463	11127179.34	7162236.224	7800452.456	8955176.743	8340916.468	7803214.14
784	[8]-Gingerol	forward	323.2214781	39.8535	5990188.423	461331.7087	4416800.398	486636.9571	13175932.3	631544.3987	913722.5167	2575293.09	3404311.617	3117825.68	3032476.79566667	3238188.391	5302350.458	4612707.534	4120904.707	2253537.369	2076351.444	2499677.918
785	Secoisolariciresinol	reverse	363.1807991	26.52005	58163.97618	79939.57674	78571.05779	115829.8349	129941.9693	106754.2211	75778.24408	70987.45066	88449.31997	80535.03944	79990.6033566667	48381.97944	59650.59795	27540.04624	39129.41724	55528.21473	35121.85243	50785.99053

## Sheet: negatively ionized metabolites.
ID	MS2 name	type	mzmed	rtmed	HG1	HG2	HG3	HG4	HG5	HG6	HG7	QC01	QC02	QC03	Mean QC	CON1	CON2	CON3	CON4	CON5	CON6	CON7
ID	MS2 name	type	mzmed	rtmed	HG	HG	HG	HG	HG	HG	HG	QC	QC	QC	Mean QC	CON	CON	CON	CON	CON	CON	CON
1	Acrylic acid	forward	71.01326182	154.8455	0.8059503	0.9877642	0.7606490	0.6055381	0.7402145	0.8226380	0.7339804	0.7335425	0.7713011	0.7351500	0.746664533333333	0.6304212	0.3924847	0.5077505	0.2754989	0.7494912	0.5112716	0.5032059
2	Arachidic acid	forward	311.296032	487.404	0.014050852	0.019164134	0.018765787	0.016145700	0.016522138	0.013696550	0.012340207	0.014741118	0.011930047	0.012139365	0.0129368433333333	0.008725802	0.013612064	0.013501695	0.011443153	0.019824826	0.013264988	0.009592221
3	But-2-enoic acid	forward	85.02889965	407.91	0.02497893	0.03815021	0.02824124	0.02229685	0.03101568	0.03561453	0.01945128	0.02911109	0.02663363	0.02694998	0.0275649	0.02409143	0.02159009	0.02151263	0.02252051	0.02697196	0.01946518	0.01929444
4	Ethyl butyrate	forward	115.0759547	72.4096	45.81857	22.69085	33.31253	25.09338	23.16109	56.09354	50.84413	52.13822	53.78462	53.54876	53.1572	72.55280	63.33256	48.96890	47.48129	79.72878	55.98401	43.93921
5	Glycolic acid	forward	75.00814073	158.801	0.03987514	0.05238127	0.04878037	0.04438156	0.05000993	0.03730423	0.04528529	0.05196162	0.04275876	0.04638132	0.0470339	0.04926497	0.05182584	0.04565792	0.04677467	0.05009385	0.04443186	0.05263587
6	Hydrocinnamic acid	forward	149.0605736	527.899	2.025803	1.648139	1.537951	1.824501	1.803713	1.482673	8.963756	1.439368	1.762391	2.886302	2.02935366666667	1.359919	2.141936	2.034915	1.567392	1.421659	1.401695	1.520070
7	Isobutyric acid	forward	87.04450815	106.1105	118.67640	56.79350	98.19699	133.10139	83.99446	94.03163	150.41519	70.82747	78.65905	75.93374	75.1400866666667	78.74828	100.03919	77.24392	71.72299	91.28883	25.81000	52.31232
8	Propionic acid	forward	73.02883964	172.803	41.38612	32.25511	36.68710	47.22307	39.23612	33.15437	52.19947	52.35458	50.96460	49.20090	50.8400266666667	39.72812	66.12240	45.15641	38.20197	72.14460	42.67204	41.77417
9	Uracil	forward	111.0195468	305.3165	0.07506413	0.11873351	0.09735343	0.08773693	0.16789959	0.14142194	0.10500130	0.10125071	0.10438023	0.19584114	0.133824026666667	0.07654128	0.07188431	0.08118659	0.04922158	0.11321296	0.07455048	0.04961654
10	Valeric acid	forward	101.0602247	86.81425	146.98835	161.23177	163.67439	167.42786	171.61902	158.35663	130.28631	129.16101	136.02180	131.32039	132.167733333333	80.20295	119.44180	103.43249	86.43508	112.41017	60.96874	128.41627
11	p-Cresol	forward	107.049753	49.2348	1.739910	1.254333	1.301649	1.703443	1.779098	1.600917	1.513728	2.624454	2.644129	2.753229	2.67393733333333	1.869463	3.531508	2.753189	4.120108	3.440423	2.873607	1.793564
12	Pentadecanoic acid	forward	241.2173535	43.5036	9.627003	17.249705	13.977153	15.375299	14.371373	11.519513	11.014467	15.790527	15.304917	14.804277	15.299907	8.856302	12.288398	4.457021	10.279028	12.314185	10.144398	9.069040
13	Glyceraldehyde	forward	89.02385716	239.6585	0.7902195	0.4486103	0.8036174	0.4225657	0.5121277	0.7479533	0.5061042	0.6997043	0.7247582	0.6690767	0.6978464	0.4142071	0.6054888	0.5094812	0.4499145	0.7186075	0.4330776	0.5650401
14	Palmitic acid	forward	255.2329039	43.5036	40.70638	62.98995	47.48190	49.54827	75.16906	46.03511	35.18234	50.40076	49.95554	47.51223	49.28951	36.97985	41.20742	20.12823	37.96435	43.07532	50.62381	36.55607
15	Oleic acid	forward	281.2493542	42.4301	36.900598	55.599427	38.319776	43.878022	42.707513	44.298070	27.403459	44.254138	46.178083	44.118157	44.850126	8.636509	13.413490	4.898225	8.192740	15.906581	13.183797	11.317875
16	16-Methylheptadecanoic acid	forward	283.2643869	40.15745	31.40931	40.18142	42.39896	31.83194	42.62372	32.76449	32.57493	23.74403	22.80398	62.72124	36.4230833333333	30.35909	29.55408	30.30161	31.22384	24.80860	74.00407	28.64317
17	L-Norleucine	forward	130.0868139	293.798	2.3669529	4.8248708	2.2157679	1.5451315	2.4537647	2.5753670	2.0324258	2.4551573	2.3520384	2.2628120	2.35666923333333	1.7844967	0.9818396	1.4977527	0.7174194	1.5058164	2.5047971	1.5315661
18	Linoleic acid	forward	279.2333134	40.60175	6.195964	14.493872	11.533001	5.054276	6.318899	23.278516	3.241044	5.109263	4.793541	4.812828	4.90521066666667	2.053406	1.810998	2.888134	1.665785	2.665261	6.344040	8.193893
19	1H-Indole-3-carboxaldehyde	forward	144.0379857	214.4225	0.41108357	0.01339032	0.01374036	0.01091180	0.02867447	0.49488484	0.27849275	0.40546015	0.42864569	0.02347615	0.285860663333333	0.01720429	0.01904942	0.02004886	0.02713856	0.02286987	0.02124023	0.01384362
20	Ethyl stearate	forward	311.2957284	39.489	26.843230	53.302884	48.908894	35.029806	41.009035	20.822366	31.056699	20.646441	19.776148	19.174997	19.865862	4.559693	14.714736	15.523941	6.539935	9.434189	6.253452	11.312838
21	Alpha-Linolenic acid	forward	277.2177321	42.32595	8.075351	7.350865	11.753318	5.719667	4.141677	8.073492	3.110749	5.216975	5.124653	4.758308	5.033312	1.631879	1.623206	1.758491	1.508392	1.974103	2.580147	2.551798
22	D-Alanine	forward	88.03977746	365.164	0.6988408	0.9912489	0.4474532	0.2889827	0.6080199	0.8764501	0.5240315	0.5145045	0.4940261	0.4687971	0.492442566666667	0.2469026	0.1737120	0.2497994	0.1273260	0.2499958	0.2773110	0.2531170
23	Benzoic acid	forward	121.0290015	354.23	0.1603286	0.2130585	0.2236639	0.1550554	0.1538630	0.1415948	0.1411451	0.1767546	0.3072966	0.1954117	0.226487633333333	0.2747300	0.3116075	0.3080985	0.2966618	0.3459403	0.2658482	0.2081197
24	2-Hydroxybenzaldehyde	forward	121.0290173	36.92485	3.657714	6.467375	5.178501	3.631899	4.443181	2.020435	5.396798	3.305735	3.196342	3.062489	3.18818866666667	1.527587	5.323582	6.672557	4.634754	3.098463	4.378093	3.659993
25	Quinic acid	forward	191.0558277	353.946	0.9637035	1.0465198	0.9466847	0.1623183	0.2550323	0.1260313	0.1743810	2.0416950	1.8560577	1.7404047	1.8793858	1.5299850	2.3237887	2.5193488	2.7745964	1.9455264	2.1357171	1.4455759
26	Creatinine	forward	112.0512372	177.938	0.2888427296	0.0035278602	0.0001033121	0.0765753242	0.0097189069	0.0964632573	0.0449067191	0.3251794524	0.3441115127	0.3476453039	0.338978756333333	0.0808889794	0.4126192026	1.0663120997	0.0967698164	0.3171046159	0.9101569527	0.1345975295
27	Caprylic acid	forward	143.1074488	55.35985	0.7248226	0.9942438	0.8385520	1.1784080	1.5484615	1.3330226	1.6862518	1.7506303	1.4191992	1.3649518	1.51159376666667	1.6910299	1.4622522	0.3241168	0.8700466	1.7937755	0.9071380	0.6675244
28	L-Proline	forward	114.0555807	333.975	1.1852697	2.5173921	1.0438502	0.9264751	0.9315113	1.6207055	1.0676307	1.0488704	1.1063174	1.0790823	1.07809003333333	0.5457135	0.3146761	0.6944515	0.2068401	0.7326118	0.6974993	0.4303849
29	Adenine	forward	134.0467485	167.69	24.111140	19.564923	13.683402	29.070362	20.948281	31.180544	5.480026	18.818904	18.683100	18.182333	18.5614456666667	15.120087	13.872820	15.949634	10.023474	11.776527	13.361403	14.613367
30	Dodecanoic acid	forward	199.1704232	49.1536	1.69735682	2.96408949	1.30526587	1.46274269	2.16730888	0.97084463	2.15725298	1.66711927	1.64984736	1.63926839	1.65207834	0.63654749	1.04105528	1.06662992	0.66399756	0.86834441	0.01693841	0.65263403
31	Isopalmitic acid	forward	255.2330485	286.779	0.12656610	0.19995950	0.15291176	0.13508953	0.15227853	0.12811051	0.11368226	0.19322750	0.16233687	0.12619860	0.160587656666667	0.26471191	0.12296000	0.09578485	0.42047251	0.11476837	0.05859602	0.10141480
32	2-Hydroxystearic acid	forward	299.259706	52.4925	3.842493	4.400092	3.958413	2.958545	4.015872	6.342661	3.390837	4.844133	4.844224	4.950882	4.87974633333333	3.621076	5.741663	4.460966	5.909467	4.297572	6.416740	5.294188
33	Heptanoic acid	forward	129.0917112	62.4879	3.158556	1.909335	2.490875	2.101206	1.954791	4.613340	3.565206	3.414055	3.557038	3.409064	3.46005233333333	4.818799	4.055001	2.571885	2.447837	6.579462	3.051662	2.664876
34	D-Ornithine	forward	131.0821891	408.187	0.09785914	0.10081545	0.09859619	0.04775201	0.16405424	0.07306159	0.10758504	0.07952819	0.07935450	0.06241309	0.07376526	0.01259885	0.03174850	0.03962211	0.02546297	0.01251809	0.03794626	0.01614470
35	"9,10-DHOME"	forward	313.2389076	63.4821	1.3654090	0.8560963	1.5930870	1.4633074	0.9965891	2.4775651	1.5306520	1.9266350	1.9784059	1.9619047	1.95564853333333	1.8081036	3.3536055	1.6677308	1.9645085	1.9979051	1.9144751	1.6075883
36	Acetylglycine	forward	116.0348877	303.414	0.8355703	1.0036999	1.5679223	0.9210516	1.8882081	0.7954151	0.5270193	1.1637661	1.2385048	1.2003462	1.20087236666667	0.4659180	0.7264656	1.0663648	0.4691942	1.8652641	1.1015880	0.4093354
37	"3,4-Dimethylbenzoic acid"	forward	149.0602388	92.80255	173.6860	107.7389	130.9062	170.6650	130.6808	131.1156	170.6588	184.0849	166.3078	156.4397	168.944133333333	344.7440	204.9889	303.8637	337.8002	199.6935	331.9967	389.9310
38	Maslinic acid	forward	471.3487928	52.1147	0.2720005	0.3320262	0.2351159	0.3131567	0.2400413	0.3250822	0.1535927	0.2115207	0.2093986	0.2123992	0.211106166666667	0.1366383	0.1801578	0.1135539	0.1268534	0.1216621	0.1390097	0.1629093
39	Cyclohexanecarboxylic acid	forward	127.0759061	73.1478	4.864123645	0.075635163	21.531619587	0.326939222	0.161356392	1.665186865	0.161608089	1.877233216	1.873605923	1.762598901	1.83781268	0.037193393	0.077978419	0.053872331	0.011851136	0.070882518	0.029518072	0.057363031
40	5-Aminopentanoic acid	forward	116.0711685	318.8275	1.3427228	2.4272393	1.0102015	0.7092412	1.2594154	1.4749959	1.0839920	1.2728775	1.3129058	1.2142091	1.26666413333333	0.9217545	0.4757255	0.7895752	0.3900260	0.7406418	1.2817255	0.7057991
41	Pyroglutamic acid	forward	128.0348426	272.229	0.06309342	0.07549553	0.08021275	0.06375831	0.09775875	0.05162190	0.06163594	0.05826239	0.05861093	0.06623823	0.0610371833333333	0.03874368	0.04587669	0.06812522	0.05931133	0.05079201	0.04449603	0.02899726
42	3-Hydroxybenzoic acid	forward	137.02393	41.0386	6.987074	3.534192	3.750745	3.851957	5.790276	14.514981	3.887555	5.027321	5.429421	4.996852	5.151198	4.050254	7.672487	6.839564	11.505066	8.960090	4.634194	3.358988
43	2-Hydroxy-6-pentadecylbenzoic acid	forward	347.2593928	51.69155	3.694163e-01	4.660396e-01	3.084736e-01	3.369283e-01	5.417880e-01	2.321028e-01	2.572015e-01	1.623110e-01	2.325435e-01	1.701567e-01	0.188337066666667	8.652674e-05	1.039123e-02	2.853469e-03	9.183557e-05	1.021925e-04	5.988009e-03	5.299376e-03
44	Pelargonic acid	forward	157.1232323	53.56685	2.607933	2.438714	2.449050	2.330884	3.146690	3.617110	2.455498	2.837808	2.919647	2.956113	2.90452266666667	1.920156	2.412058	1.879865	1.830705	2.469498	1.697298	1.567637
45	Saccharin	forward	181.9918547	30.9464	0.04511633	0.03232937	0.02285858	0.08970883	0.42461407	0.73588015	0.34887631	0.87193171	0.94099305	0.89432529	0.902416683333333	3.92150301	1.28696780	1.56809283	0.03426198	0.43089724	0.34634305	0.12355656
46	4-Hydroxybenzaldehyde	forward	121.0290231	82.7035	0.1958222	0.2022069	0.1861299	0.5487424	0.7017923	0.1837907	0.5132381	0.6593487	0.6546825	0.6580843	0.657371833333333	0.8424712	0.2023634	0.5462859	1.0002514	0.6126250	0.9338359	0.6892938
47	Hydrogen phosphate	forward	96.96923122	213.246	0.011712632	0.014183195	0.019046004	0.022844202	0.022054117	0.018268832	0.015737099	0.010156460	0.018504342	0.008437017	0.0123659396666667	0.013057480	0.083078602	0.055155176	0.014243830	0.022644747	0.018733050	0.012011027
48	Malonic acid	forward	103.0030579	107.935	0.7923465	0.9832735	1.2538605	0.9170428	0.5350959	0.6681970	0.8065519	2.8471832	2.9208424	0.2321837	2.00006976666667	2.5575886	1.8757979	2.0891594	3.3503566	2.1833367	3.3340283	2.4178753
49	Adipic acid	forward	145.0500816	392.0895	0.003059547	0.113905101	0.055895911	0.032456648	0.142868332	0.092977652	0.006048217	0.036290672	0.005720854	0.025169931	0.022393819	0.013824452	0.012147062	0.023146284	0.020526170	0.004237199	0.027401076	0.022317408
50	Glycine	forward	74.02416044	302.279	0.07446292	0.12937665	0.19260913	0.11439438	0.24517744	0.10018961	0.06660933	0.07721055	0.07369249	0.15472675	0.101876596666667	0.05456669	0.08045638	0.13583088	0.02586173	0.22801254	0.02283956	0.05043414
51	Capric acid	forward	171.1389089	51.4133	0.6987485	1.2990346	0.9776766	1.3184219	1.8744166	1.0492891	1.6629598	1.3463790	1.3082195	1.3474336	1.3340107	0.7165409	1.5463508	1.1344986	0.7242269	0.8211701	0.8535900	0.4801970
52	Carnosic acid	forward	331.1918046	305.41	0.002182536	0.003491032	0.003590101	0.004885452	0.001154081	0.003868377	0.006716944	0.004751387	0.011912245	0.008846352	0.008503328	0.015497862	0.017178157	0.018813548	0.006660453	0.027278171	0.005594871	0.004576193
53	Ursolic acid	forward	455.3549165	42.4819	1.4109351	3.0585010	1.9123909	1.4694130	1.4730882	1.7222204	1.2484612	1.1833004	1.2861103	1.2901994	1.25320336666667	0.8456069	1.0321133	0.9515074	0.7810113	0.8919699	0.7420280	1.4168986
54	13S-hydroxyoctadecadienoic acid	forward	295.2285305	50.60485	0.7547469	0.8464261	0.8169670	0.5109118	0.5881112	1.4936199	0.4659262	0.6714148	0.7042879	0.6746555	0.683452733333333	0.4803421	0.5227774	0.4087883	0.3234656	0.5540351	0.4876704	0.4394990
55	Pyrocatechol	forward	109.0289828	52.658	1.3925657	1.1936756	0.7297830	1.0720582	0.6276338	2.0731375	1.0952157	1.9568216	2.0968022	1.8230234	1.9588824	1.7627243	2.8596899	2.5310461	2.2591496	2.3203950	1.8401379	1.3224921
56	L-Lysine	forward	145.0980098	538.5365	0.15325138	0.39985872	0.05575446	0.06169161	0.05942423	0.21184557	0.20465676	0.13071461	0.12492886	0.11337499	0.123006153333333	0.06638334	0.02896870	0.05197009	0.01683646	0.06394706	0.09528640	0.03461979
57	Tetradecanedioic acid	forward	257.1757727	287.5965	2.9309540	1.4038714	1.8735877	1.7519276	1.5704776	1.4941678	2.4500885	1.8544720	1.8465944	1.7690385	1.8233683	0.7921716	1.5011768	1.7950874	1.9713616	1.7900261	1.5738403	0.7115654
58	D-Malic acid	forward	133.014031	415.6355	0.07814153	0.12404069	0.07730399	0.02995812	0.12048245	0.07122421	0.13953154	0.10783387	0.11235729	0.07912718	0.09977278	0.07146635	0.03386507	0.05703993	0.06129856	0.10436683	0.05661619	0.04357592
59	13-OxoODE	forward	293.2127876	50.76775	0.4749867	0.3345547	0.6691862	0.2293680	0.2976503	0.6552277	0.2268083	0.3888059	0.3882602	0.3755517	0.384205933333333	0.2408802	0.3384633	0.2228818	0.2201230	0.2525621	0.2489827	0.2528031
60	Succinic acid	forward	117.0188014	399.256	9.715919	14.931301	9.541073	8.705218	10.666349	8.037386	7.738805	9.059439	9.203891	8.978202	9.08051066666667	6.400853	5.759987	8.868950	4.454975	8.679079	7.007264	4.511550
61	2-Hydroxyethanesulfonate	forward	124.9910038	177.9415	0.3619014	0.8253598	0.5210443	0.1394673	0.3149676	0.3485290	0.4287196	0.5283068	0.5696614	0.5291156	0.542361266666667	0.4122535	0.3874081	0.4003052	0.7457052	0.8077191	0.6738384	0.6513094
62	"Cytidine 2',3'-cyclic phosphate"	forward	304.0344848	338.904	9.530130e-03	4.776727e-02	5.158885e-02	2.187128e-02	9.225869e-02	5.939620e-02	4.741446e-02	3.790972e-02	3.951034e-02	4.068631e-02	0.03936879	3.292597e-02	1.209341e-03	2.742490e-02	9.183557e-05	5.670814e-02	2.026764e-02	1.451176e-02
63	Pyrrole-2-carboxylic acid	forward	110.024257	48.2381	0.02061214	0.04091379	0.05725001	0.02451935	0.03732728	0.04531547	0.02047596	0.06910858	0.06026082	0.06400564	0.0644583466666667	0.08861118	0.07978327	0.08878432	0.07938135	0.07288088	0.06077832	0.03699355
64	4-Dodecylbenzenesulfonic Acid	forward	325.1849777	27.3255	0.8640966	0.5361112	1.0232349	1.0071415	0.8405297	0.6861585	0.6977327	1.6120722	1.7515493	1.6898110	1.6844775	0.4382189	0.7883813	0.2649515	0.5486706	1.3881439	1.2322995	0.6093654
66	Ricinoleic acid	forward	297.2438995	49.0465	8.026908	9.735895	7.402122	6.979790	7.029001	9.095655	7.783226	11.231254	11.250623	10.962187	11.1480213333333	8.315535	11.449718	9.297950	9.172996	11.266755	10.897936	10.785085
67	"1,3-Benzenediol"	forward	109.0289737	204.574	0.02111422	0.08299166	0.05189809	0.05649482	0.04943730	0.03986408	0.05664014	0.09110021	0.09827446	0.08778743	0.0923873666666667	0.07967778	0.08094836	0.21417550	0.20225624	0.14364997	0.20314154	0.06092107
68	Glutaric acid	forward	131.0346548	398.093	0.5829307	0.3744456	0.5493366	0.5492453	0.4880874	0.6096286	0.4899624	0.5606796	0.5700309	0.5674130	0.566041166666667	0.3776678	0.5360711	0.6353826	0.5770063	0.5104008	0.6018079	0.3023809
69	Myristic acid	forward	227.2018817	508.769	0.04156139	0.05525979	0.03481767	0.04220964	0.11268474	0.04108362	0.03779217	0.04489391	0.04334294	0.04737669	0.0452045133333333	0.03406948	0.04254532	0.03791250	0.03832093	0.04126569	0.04117691	0.01235075
70	"1,11-Undecanedicarboxylic acid"	forward	243.1604003	302.497	1.1420941	0.7814671	0.6679774	1.1293236	0.6814915	0.4694760	0.7289798	1.1173239	1.1701858	1.1032430	1.1302509	0.9823785	1.8681544	1.4577387	1.4770242	0.9433895	1.2201014	0.6788543
71	3-Nitrotyrosine	forward	225.0405449	363.472	0.006236582	0.006122594	0.006009647	0.003754801	0.003018965	0.002506394	0.005620808	0.015849531	0.016033654	0.008067805	0.0133169966666667	0.011905131	0.458594029	0.014011249	0.608895610	0.517392060	0.006669197	0.007052771
72	Citrulline	forward	174.0883944	409.077	0.10632352	0.11268871	0.10438908	0.05646821	0.19005909	0.07745133	0.12496708	0.08483884	0.08561277	0.07955360	0.08333507	0.01606554	0.04298699	0.05268413	0.03710690	0.02070697	0.04269403	0.02259054
73	Ethyl dodecanoate	forward	227.2018714	481.168	0.01944495	0.03081429	0.02550136	0.02181039	0.02368898	0.02189364	0.02008940	0.02436333	0.02333548	0.02405772	0.0239188433333333	0.01731134	0.02055497	0.01940398	0.02021150	0.02040377	0.02051105	0.02018299
74	Benzyl acetate	forward	149.0605886	707.3115	0.2230660	0.2283980	0.2153509	0.2397927	0.2335914	0.1942105	0.2410059	0.2047942	0.3334860	0.2297502	0.256010133333333	0.2587110	0.2978127	0.2280284	0.4315223	0.3020732	0.2058796	0.3279309
75	Lipoxin A4	forward	351.2165442	295.129	0.0037367595	0.0017793169	0.0034523859	0.0022057946	0.0019036986	0.0023534644	0.0028246043	0.0034475943	0.0040513971	0.0032828856	0.003593959	0.0020285380	0.0027347499	0.0027028380	0.0003253312	0.0022224475	0.0027153592	0.0011366533
76	3-Hydroxybutyric acid	forward	103.0395082	208.341	0.1442329	0.1897572	0.1831978	0.1417874	0.1859172	0.1720403	0.2130936	0.1988287	0.2141177	0.1799343	0.1976269	0.1856635	0.1653156	0.2071265	0.1658316	0.1678716	0.2022804	0.1608261
77	Nicotinic acid	forward	122.0243765	236.0205	1.7510810	2.1071657	1.1838529	1.1898720	2.1072904	1.5713732	2.4893891	1.5813474	1.6102653	1.5218464	1.57115303333333	1.0285157	0.9322470	0.9201834	0.7670495	1.4004335	0.9451918	0.8600903
78	"D-2,3-Dihydroxypropanoic acid"	forward	105.0188273	322.639	3.8116745	1.6961781	1.7776336	0.8459432	1.5509348	2.5656757	1.4552063	1.4823531	1.5442338	1.4618699	1.49615226666667	0.6328696	0.6731522	0.6890592	0.9771166	0.7882776	0.7884707	0.6130842
79	Artocarpin	forward	435.1829365	225.0305	3.200447e-04	1.103389e-04	1.033121e-04	4.664896e-04	3.011756e-04	9.125434e-05	8.542403e-05	9.800060e-04	1.029961e-03	6.854358e-04	0.0008984676	2.815713e-04	1.056154e-04	9.880018e-04	1.605559e-03	2.973604e-03	1.977294e-03	2.509866e-04
80	N-Alpha-acetyllysine	forward	187.1086433	407.938	0.10526986	0.22282300	0.10437851	0.11509522	0.07986837	0.14025794	0.15244617	0.15779865	0.16308047	0.13807365	0.152984256666667	0.14378292	0.13429240	0.12347002	0.07330215	0.16606514	0.15276111	0.10044275
81	Ethyl tetradecanoate	forward	255.2330108	9.07525	0.1257568	0.1778424	0.1580178	0.1276209	0.1300371	0.1322093	0.1299917	0.1317681	0.1466015	0.1506462	0.143005266666667	0.1433499	0.1809417	0.1240229	0.1889875	0.1525619	0.5514253	0.1690788
82	(E)-3-(4-Hydroxyphenyl)-2-propenal	forward	147.0447251	25.5124	0.04327956	0.04687014	0.04113548	0.05791139	0.04423099	0.04457048	0.04867586	0.09708517	0.09655355	0.09140594	0.0950148866666667	0.09548030	0.14283119	0.10295303	0.09214782	0.14489849	0.15108008	0.07184143
83	Urocanic acid	forward	137.0351816	308.936	0.36082991	0.41573301	0.13377561	0.17858237	0.35147259	0.19422431	0.27079753	0.19915075	0.19108469	0.18375930	0.19133158	0.11015656	0.09256732	0.08016811	0.02270867	0.06055748	0.12199934	0.07271484
84	Diosmetin 7-neohesperidoside	forward	607.1685789	219.801	0.0019348275	0.0079621534	0.0153383634	0.0034517472	0.0001030738	0.0004728495	0.0004982462	0.0100245837	0.0084831993	0.0102968398	0.00960154093333333	0.0099448050	0.0045722770	0.0050638146	0.0024720525	0.0074409315	0.0236870571	0.0335270821
85	Xanthine	forward	151.0259831	230.393	0.3174594	3.6895613	3.6660256	0.5913190	2.5692853	1.4584390	0.4693037	1.0233107	0.9453485	0.9902817	0.986313633333333	1.4485255	0.1006376	0.1676459	0.2533796	0.1393752	0.6284226	0.9389482
86	2-Oxovaleric acid	forward	115.0395225	61.6812	4.952608e-01	8.384066e-01	7.238990e-01	2.216651e-01	9.434474e-01	2.769654e-01	3.934598e-01	7.857257e-02	8.187055e-02	8.868450e-02	0.08304254	8.652674e-05	9.155795e-03	2.318538e-02	2.510416e-02	1.708836e-02	2.013358e-02	5.228583e-03
87	Phenylalanylproline	forward	261.1251632	255.781	0.020396061	0.001710613	0.019079737	0.011249922	0.029509352	0.017742816	0.018105954	0.012154833	0.014424014	0.014155583	0.0135781433333333	0.011990290	0.015483356	0.014754164	0.028011158	0.005249402	0.018073571	0.007829615
88	"(10E,12Z)-(9S)-9-Hydroperoxyoctadeca-10,12-dienoic acid"	forward	311.2233652	99.62995	0.1659734	0.1344399	0.1866159	0.1812813	0.1588681	0.3475945	0.1950884	0.3411436	0.3610750	0.2491030	0.3171072	0.3812699	0.6336567	0.5134943	0.4815181	0.4918615	0.2970029	0.1885044
89	4-Hydroxybenzoic acid	forward	137.0239609	202.393	1.4076823	0.9870040	0.6451882	0.3265634	2.5103999	0.3398416	1.0126473	3.5611937	3.5707281	3.3457163	3.49254603333333	4.6231444	4.5365060	6.0871719	6.8951957	4.9338453	5.7229432	3.3289334
90	Medicagenic acid	forward	501.3233861	56.1653	0.015246419	0.018967057	0.026334714	0.046163704	0.016404832	0.012040181	0.013871651	0.011383682	0.015324336	0.011838667	0.012848895	0.011673585	0.013981696	0.011379915	0.007878694	0.013100372	0.007771308	0.006535512
91	15-Keto-prostaglandin E2	forward	349.2009148	250.08	0.0032999808	0.0038410101	0.0051102725	0.0035880511	0.0039253148	0.0023078430	0.0009179419	0.0046655047	0.0053484488	0.0019855937	0.00399984906666667	0.0045962505	0.0057551833	0.0036876780	0.0057915386	0.0054217573	0.0037621514	0.0030092932
92	Kynurenic acid	forward	188.0353491	47.60345	0.10172908	0.08507172	0.09887795	0.09048304	0.12872453	0.09138084	0.08509730	0.14162998	0.13691528	0.12990831	0.13615119	0.12835363	0.24476337	0.13104595	0.14811394	0.24987916	0.14563615	0.10090625
93	Hexadecanedioic acid	forward	285.2078888	255.579	0.59447206	0.05892252	0.06259917	0.81584127	0.65005730	0.37362909	1.02685509	0.60402308	0.60593087	0.58136142	0.597105123333333	0.26616421	0.83097795	0.62952885	0.51429595	0.51274980	0.38430777	0.30804417
94	Taurine	forward	124.0068665	314.34	0.026261321	0.028214460	0.009563973	0.012476726	0.012690784	0.028915415	0.009766993	0.024076408	0.022077512	0.021589591	0.0225811703333333	0.009051639	0.008196056	0.021013316	0.008086635	0.008519323	0.010922709	0.009951268
95	Uridine	forward	243.0627205	170.0595	9.541813	8.906037	15.641040	5.457536	14.274676	9.008886	12.702172	8.768502	9.309742	8.954074	9.01077266666667	5.935044	5.798547	5.159355	3.367453	5.382176	4.287949	4.109413
96	Umbelliferone	forward	161.0241624	39.34905	0.10902065	0.11240673	0.12018736	0.10727837	0.08429502	0.07813613	0.07467629	0.08794634	0.11903845	0.09549600	0.10082693	0.06744445	0.09850812	0.12613005	0.09777239	0.08425486	0.08074688	0.08793977
97	D-Sedoheptulose 7-phosphate	forward	289.0337072	351.282	0.031350094	0.033787726	0.040229866	0.019495189	0.029908711	0.012171081	0.019896304	0.049281451	0.045099734	0.050533773	0.048304986	0.003456951	0.006786583	0.009297480	0.005874574	0.005893759	0.003627971	0.002733962
98	"8-iso-13,14-dihydro-15-keto-PGF2a"	forward	353.2342866	260.996	0.02581544	0.02960944	0.03781818	0.02568377	0.04149090	0.01828793	0.02505867	0.02935027	0.03243466	0.02316524	0.0283167233333333	0.01863902	0.03637509	0.03774390	0.02575180	0.02964291	0.02429616	0.01633125
99	2-Pyrocatechuic acid	forward	153.0189244	52.69655	18.066772	15.489762	9.045680	13.996709	7.868942	26.791018	14.005460	24.843331	24.950413	23.377330	24.390358	22.786672	37.267784	33.035898	30.941741	30.287563	24.031408	17.315792
100	Ethyl oleate	forward	309.2799822	43.0834	1.1994122	2.6142767	0.5817116	0.5241845	4.3312264	0.6392534	1.2238691	1.0117461	1.0381449	0.8732943	0.9743951	0.4221136	0.4813264	0.6596546	0.3789890	1.0938303	0.6273668	0.4880420
101	4-Aminophenol	forward	108.0449597	144.524	0.05517061	0.11166343	0.09514241	0.17477146	0.08018427	0.08145422	0.09760119	0.14589297	0.14294197	0.19764802	0.162160986666667	0.02693810	0.06453981	0.11438115	0.07597988	0.08685980	0.13830428	0.11283699
102	gamma-CEHC	forward	263.128987	298.432	0.005866119	0.006934243	0.005230381	0.009823143	0.009674835	0.006428727	0.011314084	0.009731283	0.018829629	0.016927329	0.015162747	0.017007908	0.025240299	0.021436905	0.007206669	0.017387981	0.007114867	0.013530072
103	Phenoxyacetic acid	forward	151.0399109	182.206	0.05320607	0.06798313	0.05554437	0.06604473	0.05874812	0.05326468	0.04724942	0.07971086	0.11147144	0.06439540	0.0851925666666667	0.15785245	0.08949637	0.07844289	0.27162075	0.09348271	0.12467054	0.06866400
104	Aesculetin	forward	177.0190703	185.2525	0.2611998	0.3294133	0.3233212	0.3261033	0.4023041	0.1813054	0.2817667	0.4195435	0.4688813	0.6248374	0.504420733333333	0.3381520	0.4193197	0.5467082	0.5464018	0.1795228	0.4165916	0.3097332
105	Methylgingerol	forward	307.1896809	255.055	0.006415635	0.002963540	0.000870933	0.010194069	0.008156459	0.003865416	0.012386692	0.007322882	0.007536388	0.006317153	0.00705880766666667	0.004089883	0.003658879	0.005797356	0.003448757	0.006158772	0.002398483	0.004444785
106	6beta-Hydroxyasiatic acid	forward	503.3391188	168.708	0.061376409	0.041648675	0.047254607	0.086251775	0.062921188	0.031724732	0.025797487	0.031653142	0.032205851	0.034568967	0.03280932	0.014213232	0.011819532	0.013386596	0.014436126	0.006621563	0.012994878	0.005448258
107	Mesaconic acid	forward	129.0189222	34.3445	0.005882368	0.007409399	0.004991433	0.005180500	0.004818295	0.002085975	0.006302690	0.024269397	0.020163090	0.022722281	0.0223849226666667	0.027880902	0.019886131	0.019140003	0.032015694	0.032084362	0.031708168	0.015194709
108	"3,3-Dimethylglutaric acid"	forward	159.066034	133.678	3.4175756	0.2248130	0.5278740	4.3056597	0.3532534	3.3849510	3.0664290	5.0166827	5.2799170	5.3229362	5.20651196666667	2.9109113	0.4259572	6.3420400	11.7706916	0.8079617	3.3616082	1.2053395
109	16-Hydroxy hexadecanoic acid	forward	271.2282553	57.2336	2.5377295	0.8711446	1.7700320	2.6490365	1.0501933	0.6497969	0.6370558	0.8265966	1.6262525	0.8041407	1.08566326666667	1.0134552	0.7930374	1.3440035	1.4218752	0.5882124	0.8309440	2.0923169
110	Cosmosiin	forward	431.1001082	152.134	0.03624583	0.03983187	0.04582204	0.02118576	0.04618880	0.01435920	0.02307485	0.03430172	0.03463275	0.03656206	0.03516551	0.02621677	0.03524775	0.03229998	0.01756840	0.02601654	0.03163106	0.03421765
111	2-Methylglutaric acid	forward	145.0502151	75.6304	0.024658067	0.033968067	0.063179124	0.007291772	0.040918708	0.040523600	0.005052443	0.127132573	0.143581867	0.114722661	0.128479033666667	0.212954561	0.026177796	0.189474157	0.266387227	0.144163289	0.185599957	0.128660239
112	Indoleacetic acid	forward	174.055744	150.3325	2.7191307	1.6599127	1.8936979	0.8206063	1.5984427	1.1222058	0.8468950	1.6422233	1.6457775	1.5527585	1.61358643333333	0.9523208	1.8806663	1.6431844	0.9958058	0.8968326	1.8906111	0.3115423
113	(2E)-3-(2-hydroxyphenyl)-1-(4-methoxyphenyl)prop-2-en-1-one	forward	253.0933408	334.032	0.056822752	0.007643642	0.012174887	0.016633497	0.007474877	0.028600248	0.007685340	0.027131805	0.021014113	0.011918325	0.0200214143333333	0.004209496	0.153470540	0.024549004	0.013038134	0.023791295	0.023744622	0.003783105
114	Phenylpyruvic acid	forward	163.0399159	192.432	1.461573	2.032240	1.700983	1.455020	1.755322	1.037017	1.938964	1.936776	2.023726	1.943806	1.96810266666667	1.449997	1.533547	1.615727	1.920519	2.129107	1.933938	1.827036
115	Monomethyl glutaric acid	forward	145.0501876	363.108	0.17321735	0.03714230	0.03976604	0.06374765	0.07921872	0.05395656	0.19783755	0.24335299	0.26937545	0.25394267	0.255557036666667	0.42262969	0.18542909	0.28576357	0.48273481	0.20776272	0.10051617	0.05021216
116	Leucinic acid	forward	131.0710222	138.6935	0.5487574	0.5662554	0.3017518	0.3741781	1.1606975	0.7430969	0.2377960	0.2299387	0.5838202	0.3403161	0.384691666666667	0.2413135	0.2914441	0.1075470	0.2303000	0.6298723	0.4429390	0.2167798
117	Dodecanedioic acid	forward	229.1446248	253.987	0.07293758	0.06884872	0.06564286	0.09168209	0.09202881	0.14956724	0.02745732	0.05121931	0.05281530	0.04984961	0.05129474	0.05612694	0.04133457	0.05944953	0.05157956	0.04215082	0.02663006	0.01469995
118	Zeranol	forward	321.1692436	302.536	8.684074e-03	7.404205e-03	6.664877e-03	5.701285e-03	5.132869e-03	3.143476e-03	5.848996e-03	7.072783e-03	7.437863e-03	1.912323e-03	0.005474323	5.396479e-03	6.654170e-03	9.158528e-05	6.620003e-04	6.220312e-03	6.069434e-03	4.995931e-03
119	N-Acetyl-D-glucosamine	forward	220.0828413	271.153	0.05345274	0.05424591	0.04342283	0.03511366	0.04492836	0.04789843	0.04127603	0.03887743	0.04327096	0.04038359	0.0408439933333333	0.03146336	0.02352202	0.02842255	0.02084328	0.03106923	0.02698066	0.02815925
120	Phenylglyoxylic acid	forward	149.0240351	34.46215	0.053124869	0.099199134	0.042343557	0.033894955	0.087039531	0.037680971	0.009150640	0.062059056	0.031613524	0.060640321	0.0514376336666667	0.093960708	0.025468742	0.041462266	0.031251515	0.028604875	0.103992889	0.065226842
121	Deoxycholic acid	forward	391.2852834	140.2925	0.033091755	0.077369590	0.040813948	0.033920281	0.044216423	0.029264621	0.028871734	0.046505024	0.031631771	0.026820546	0.0349857803333333	0.012121971	0.023401778	0.022551918	0.030323543	0.004726448	0.023021736	0.025358844
122	2-Indolecarboxylic acid	forward	160.0403032	31.6591	0.01323329	0.01008597	0.01031094	0.01417740	0.01558212	0.02719999	0.01478714	0.05042964	0.05992379	0.05601887	0.0554574333333333	0.05987566	0.10828052	0.06341391	0.12327858	0.07396092	0.06370629	0.04057074
123	Hypogeic acid	forward	253.2177452	39.6494	0.3918423	0.6142586	0.4287862	0.1663431	0.4176183	0.3355574	0.5530297	0.3507914	0.3222176	0.3557600	0.342923	0.1174268	0.1345629	0.1406537	0.1352291	0.1915124	0.2151342	0.1814004
124	3'-Hydroxydaidzein	forward	269.0460149	51.24495	0.09879961	0.35357651	0.48200839	0.69525940	0.08897037	0.11613229	0.43951703	0.15154570	0.12661070	0.13335990	0.1371721	0.26470288	0.16164744	0.17193163	0.16774021	0.17227749	0.12287296	0.18208308
125	N-Acetyl-L-methionine	forward	190.0510742	209.53	0.395075221	0.543346209	0.006900591	0.008226128	0.777609498	0.025434982	0.009598552	0.042307260	0.018740261	0.038540754	0.0331960916666667	0.017615609	0.019665576	0.018086026	0.034980263	0.024991266	0.030035184	0.010491021
126	Hydroxyoctanoic acid	forward	159.1026075	173.77	0.3335860	0.2563909	0.3197013	0.3412521	0.3883321	0.5722210	0.3565576	0.5529059	0.5963328	0.5936771	0.580971933333333	0.6089298	0.5229097	0.7451236	1.0938265	0.6825826	0.7516368	0.5225948
127	N-Acetyl-L-aspartic acid	forward	174.0407678	405.422	0.23245303	0.35768904	0.23003597	0.21682856	0.33109901	0.17224934	0.19970624	0.22232687	0.22328084	0.22205891	0.22255554	0.17896275	0.01048592	0.13376468	0.16001647	0.24970475	0.18969328	0.13590504
128	Saccharopine	forward	275.1256655	461.5175	0.004109973	0.005672378	0.002538773	0.002997650	0.008069026	0.003590971	0.004071043	0.008388926	0.005120125	0.005064480	0.006191177	0.004294583	0.003162624	0.002696252	0.005216763	0.002652140	0.007114745	0.004634406
129	Azelaic acid	forward	187.0977241	97.4288	0.70101120	0.12094011	0.32669145	0.11541143	0.11207149	0.14053206	0.13613592	0.13106168	0.14282157	0.16518203	0.146355093333333	0.06782085	0.21049946	0.07740225	0.09203006	0.10650888	0.03183834	0.04228409
130	Prostaglandin B1	forward	335.2238529	62.0095	0.01153789	0.02891143	0.05290817	0.03957162	0.07288723	0.14842624	0.04101346	0.09774788	0.05903321	0.08138630	0.07938913	0.04404674	0.07801117	0.03176187	0.05101900	0.06263032	0.04105165	0.03827985
131	3-Hydroxycapric acid	forward	187.1340819	116.396	1.7018922	0.8625080	1.0602018	0.9424282	1.4983887	0.8732920	1.2076370	1.7175536	1.9381836	1.9307849	1.86217403333333	2.0210165	2.3214582	2.3185687	3.2180712	2.8820394	1.3383917	1.7470748
132	Pantothenic acid	forward	218.1033394	291.711	0.52723028	2.42042309	0.83246404	0.36776021	0.92074168	0.92014328	0.56661969	0.37409008	0.43561196	0.38143822	0.397046753333333	0.26652700	0.06054503	0.11275865	0.07724353	0.13161199	0.12128996	0.41924539
133	Hippuric acid	forward	178.0509294	210.766	0.05941080	0.07594468	0.01938410	0.02787380	0.03455850	0.01574749	0.02287951	0.05607674	0.06020714	0.05743270	0.0579055266666667	0.03790397	0.03993937	0.09105033	0.03122188	0.08046308	0.06165841	0.05415840
134	"9,10-epoxyoctadecanoic acid"	forward	297.2443654	288.471	0.017463563	0.014591182	0.011265047	0.010529085	0.013371713	0.011867160	0.010428336	0.010917353	0.012876252	0.010895259	0.0115629546666667	0.013344853	0.010129682	0.010412117	0.008736225	0.010792206	0.008203438	0.011085224
135	Sebacic acid	forward	201.1130148	342.707	0.8623893	0.8567229	0.7025830	0.8976625	1.1065998	0.8990901	0.8955908	1.5518686	1.6338851	1.5385480	1.57476723333333	1.8793749	1.9683080	2.1067127	2.6226871	2.0390408	1.5297928	1.1529588
136	Maleic acid	forward	115.003116	49.6778	0.004609235	0.047544764	0.042700368	0.012380931	0.045639270	0.008039095	0.001110982	0.006400884	0.021698103	0.020203936	0.0161009743333333	0.034551477	0.010716998	0.009229998	0.019928668	0.017372932	0.014144759	0.040901847
137	(R)-2-Benzylsuccinate	forward	207.0664392	200.364	0.1290795	0.2115374	0.1758255	0.1218429	0.2100308	0.1082033	0.2444342	0.3479830	0.3661047	0.3381011	0.3507296	0.4723103	0.3036328	0.4084689	0.3563779	0.4524865	0.3877874	0.2218206
138	Phytanic acid	forward	311.2957162	623.246	0.008262583	0.012567902	0.011593431	0.009841788	0.010801419	0.009424596	0.008521001	0.010076503	0.008315902	0.010381791	0.00959139866666667	0.005887887	0.009338804	0.007644922	0.007568966	0.008048836	0.007018842	0.006441362
139	Methyl jasmonate	forward	223.1343331	219.275	0.01879115	0.01233227	0.01382648	0.01263460	0.02759643	0.01426924	0.03353974	0.07140570	0.06758432	0.07247548	0.0704885	0.08001579	0.09171005	0.14092601	0.27113034	0.07689257	0.09522348	0.04491614
140	Cholic acid	forward	407.2816368	250.6765	0.0093742504	0.0003502986	0.0039659747	0.0036259838	0.0036196707	0.0027648015	0.0014600899	0.0054790189	0.0058691548	0.0056907169	0.0056796302	0.0037358950	0.0118504211	0.0052568478	0.0046660534	0.0114478208	0.0075261799	0.0014525665
141	trans-Cinnamic acid	forward	147.044741	67.0101	0.22269743	0.19932593	0.17877218	0.16201625	0.32182449	0.06927261	0.24171048	0.34722478	0.32946498	0.29192101	0.322870256666667	0.33710590	0.38810656	0.35520047	0.42974767	0.20355846	0.43218857	0.24163954
142	N-Acetyl-L-tyrosine	forward	222.0770929	240.7275	0.03317470	0.04757031	0.03414896	0.03201185	0.04199074	0.02182899	0.02898048	0.03135125	0.03263052	0.03054696	0.0315095766666667	0.02285462	0.01938840	0.02592134	0.01896933	0.03610819	0.02498576	0.02369185
143	(2E)-Decenoyl-ACP	forward	128.0713832	329.0805	0.54711809	0.98497850	0.55585146	0.51719138	0.25540860	0.34030555	0.20349277	0.40293589	0.41874907	0.39978989	0.407158283333333	0.19646192	0.19382048	0.42263169	0.10656964	0.40009903	0.21194321	0.05720595
144	L-Phenylalanine	forward	164.0713588	276.69	1.8410994	3.0318871	1.6238694	1.1195937	1.5045507	1.4800369	1.2717961	1.3308623	1.5360979	1.4419033	1.43628783333333	0.9259149	0.6055891	0.8408988	0.5053499	0.8017216	1.1193252	0.9064519
145	Heneicosanoic acid	forward	325.3112898	43.9431	0.08429887	0.09119382	0.15795199	0.07988988	0.09807251	0.07476338	0.09197689	0.08448740	0.12088923	0.12287943	0.109418686666667	0.40356163	0.36577375	0.27478263	0.50917376	0.19004061	0.34272644	0.37130763
146	Luteolin	forward	285.0411508	54.94245	0.6303363	0.8396001	0.6016438	0.5725729	0.5085895	0.5094547	0.2677195	0.9105203	0.9698191	0.9138626	0.931400666666667	0.5059634	1.0358965	0.8911683	0.5333294	0.5731905	0.8988429	0.8737199
147	3-Methyl-2-oxovaleric acid	forward	129.0552959	369.1665	0.03057913	0.03130756	0.02751328	0.02693025	0.03002577	0.02322440	0.02170832	0.03795059	0.02855669	0.02443367	0.03031365	0.02917542	0.03019973	0.04002603	0.04053482	0.03320963	0.03866223	0.02523157
148	L-Serine	forward	104.0347396	395.4375	0.13201631	0.26930391	0.10188625	0.06194912	0.11482309	0.16065952	0.11266629	0.10154203	0.07828854	0.06914299	0.0829911866666667	0.05076979	0.01617338	0.03623834	0.02265629	0.05388506	0.07424108	0.04555610
149	3-(2-Hydroxyphenyl)propanoic acid	forward	165.0555967	66.8787	7.596924	7.055700	5.702107	5.328479	11.431284	3.589678	8.824921	10.128460	10.724176	10.370356	10.407664	10.904606	12.992049	11.763659	13.736435	5.506926	14.691321	7.785456
150	Thymine	forward	125.0350965	68.3364	2.833631	3.872616	3.722947	2.372475	2.326001	4.284304	4.248331	2.786247	2.719094	2.616136	2.707159	1.754542	1.119359	1.071521	2.358205	2.156780	1.110461	1.428143
151	L-Glutamic acid	forward	146.0456006	410.699	1.7471927	2.7373183	1.2231097	1.2231839	1.6177410	1.5076682	1.4779779	1.3260216	1.3707019	1.2798407	1.3255214	1.0935505	0.5546428	0.6411167	0.5577329	1.0008623	0.7579652	0.6835325
152	Abscisic acid	forward	263.1290028	167.1025	0.2784868	0.1438384	0.2062126	0.2827263	0.4192671	0.2047500	0.2754027	0.2328185	0.2649963	0.2343240	0.244046266666667	0.1945632	0.3241927	0.1673843	0.1587062	0.1477190	0.1605952	0.1297517
153	4-Methylumbelliferone	forward	175.0400581	86.1776	0.548802238	0.634975857	0.781281758	0.249155012	0.007489198	0.133873728	0.104167913	0.196744352	0.252757019	0.205453874	0.218318415	0.185654938	0.387454704	0.309220351	0.217563940	0.051986555	0.199203724	0.146431283
154	Adenosine	forward	266.0901576	179.7015	0.036981657	0.032059515	0.021249318	0.024062636	0.014725341	0.077975947	0.047960108	0.031801392	0.031398078	0.035090398	0.0327632893333333	0.018982773	0.029774210	0.024618840	0.014089123	0.022478982	0.015638170	0.012653738
155	Cholesterol sulfate	forward	465.3052946	24.5368	2.038240	3.585310	1.692656	2.856917	2.026814	2.695537	2.281804	2.934942	2.925774	2.973072	2.944596	2.099623	2.016858	4.582425	3.318996	5.320806	3.138703	3.257646
156	Deoxyribose 5-phosphate	forward	213.0175638	197.266	0.44999208	0.12520077	0.27637452	0.05529929	0.40193679	0.67083510	0.12465178	0.16246945	0.17054898	0.18060830	0.17120891	0.15137079	0.08687717	0.09446324	0.02480563	0.22979673	0.10679930	0.16350724
157	3-(4-hydroxy-3-methoxyphenyl)prop-2-enoic acid	forward	193.0504409	174.953	0.3955569	0.5084748	0.4923667	0.3968694	0.4855141	0.3096454	0.4234327	0.4629389	0.6463229	0.4240284	0.511096733333333	0.3995286	0.4084248	0.4446712	0.6012666	0.5276108	0.4347168	0.3232783
158	"4-[(E)-2-(3,5-dimethoxyphenyl)ethenyl]phenol"	forward	255.1028854	217.35	0.01106270	0.01416946	0.01913576	0.01631768	0.01229938	0.01635567	0.01803032	0.02692981	0.02371951	0.02625754	0.02563562	0.02423906	0.02889166	0.03826000	0.05170214	0.03230104	0.03040806	0.01555381
159	Indole-3-carboxylic acid	forward	160.0402766	77.57255	0.5975778	0.2262025	0.3724935	0.2666539	0.5154712	0.5567349	0.1802912	0.2406318	0.2328408	0.2239432	0.232471933333333	0.3317734	0.3604883	0.2108669	0.1014912	0.1529560	0.2063643	0.1193441
160	3-Methylxanthine	forward	165.0414642	223.7185	0.05141876	0.04920596	0.05190925	0.05712868	0.06407989	0.03994796	0.06079483	0.06037750	0.05844424	0.05372388	0.0575152066666667	0.03905711	0.05274820	0.04856190	0.05550525	0.06072211	0.04555510	0.02826461
161	Ethyl hexadecanoate	forward	283.264389	71.0603	1.4755408	3.3232725	1.4922169	1.2189851	1.6379835	0.8364103	2.4482181	0.5246790	0.8443717	0.5759211	0.648323933333333	8.1292063	4.3874804	8.5339847	4.2845926	4.2330828	8.0454703	1.0132182
162	7-Methylguanine	forward	164.0577469	200.549	0.064622472	0.120239197	0.069688571	0.025682697	0.044645040	0.058067462	0.126529741	0.045669756	0.054526191	0.052356033	0.05085066	0.030870119	0.023049476	0.022909387	0.004772307	0.028068165	0.019741519	0.027899675
163	Deoxyguanosine	forward	266.0902131	248.78	0.06115474	0.12033190	0.17674302	0.05248135	0.04552277	0.14784369	0.21403985	0.08583355	0.09434435	0.09008628	0.09008806	0.03623911	0.03631720	0.02108781	0.14203251	0.03601085	0.01518964	0.02711841
164	"3,3',4'5-Tetrahydroxystilbene"	forward	243.0667774	23.5918	0.08789430	0.10010759	0.10114312	0.09012215	0.08080748	0.08503446	0.09869651	0.24568180	0.23985592	0.23085545	0.238797723333333	0.17117134	0.34690929	0.33745136	0.47040100	0.31387444	0.29036617	0.29488193
165	N-Acetylglutamine	forward	187.072183	329.414	0.020226169	0.027847871	0.032570879	0.026660247	0.034781972	0.014565544	0.017371419	0.018103052	0.021864629	0.018871296	0.0196129923333333	0.014063723	0.014466839	0.009341242	0.013288438	0.013531433	0.003913027	0.007127875
166	Inosine	forward	267.074014	233.817	2.3303068	6.2147960	5.1269071	1.2650124	3.5196019	2.8612846	7.5741976	2.9972364	3.1128277	2.9831722	3.03107876666667	1.5304203	0.9143784	1.5518654	0.8666675	1.8745574	1.3199891	0.9778453
167	Terephthalic acid	forward	165.0192402	455.8315	0.02081588	0.02413297	0.02332849	0.01847508	0.02382208	0.02048042	0.01839560	0.02768645	0.03201622	0.02649319	0.0287319533333333	0.02495049	0.03038493	0.03188037	0.03092626	0.02972470	0.02697719	0.01889701
168	Sclareol	forward	307.2649078	44.6368	0.2540133541	0.5166112260	0.1457148409	0.2818744120	0.5792800702	0.1533911648	0.2948680256	0.2065219469	0.2289209420	0.1872706905	0.207571193133333	0.0169131356	0.0001056154	0.0575191780	0.0262944471	0.0918862540	0.0373455504	0.0553874976
169	Gallic acid	forward	169.0143162	331.702	0.003634727	0.007459283	0.004667071	0.003146406	0.005561569	0.004240399	0.004415657	0.013728175	0.009477422	0.010974292	0.0113932963333333	0.025416477	0.014955366	0.015767746	0.021915644	0.018115565	0.016425255	0.010095814
170	N-Acetylglutamic acid	forward	188.0561657	400.285	0.20478596	0.26528714	0.12497998	0.16652640	0.29292168	0.17255570	0.19258835	0.15470751	0.17226692	0.15812753	0.161700653333333	0.10549596	0.08047087	0.07686291	0.12628275	0.11342428	0.07938596	0.08074744
171	p-Anisic acid	forward	151.0398448	49.35495	2.026892	1.339893	1.449045	1.919885	2.202472	1.785850	1.686162	2.921161	3.219660	2.917090	3.01930366666667	2.011438	3.788877	2.751727	4.163035	3.678964	3.077069	2.027028
172	D-Aspartic acid	forward	132.0299628	417.447	0.4959868	0.8704645	0.2958051	0.3143233	0.3114546	0.5686946	0.4124178	0.3798535	0.3909337	0.3649938	0.378593666666667	0.3954358	0.1267313	0.2154865	0.1755489	0.3411107	0.3293390	0.2027387
173	"(9xi,10xi,12xi)-9,10-Dihydroxy-12-octadecenoic acid"	forward	313.2389845	230.171	0.25998166	0.04036628	0.05305880	0.38976501	0.29592229	0.20751079	0.35877750	0.34260642	0.34197431	0.33275987	0.339113533333333	0.31144147	0.45159477	0.42574858	0.46414042	0.30569755	0.40916998	0.27815203
174	8-Hydroxyoctanoate	forward	159.1025998	160.681	0.2426309	0.1924603	0.2050569	0.2226489	0.2729726	0.2350432	0.2700652	0.4379222	0.4369512	0.4470478	0.4406404	0.4316436	3.4946862	0.4279750	0.5592832	2.8478486	0.5293947	0.3528685
175	2-Hydroxycinnamic acid	forward	163.0398976	205.767	0.1438159	0.2312736	0.1812774	0.1862713	0.2158242	0.1693238	0.2059068	0.2161970	0.2313940	0.2104303	0.219340433333333	0.1689174	0.1732364	0.1912631	0.2152504	0.2023526	0.2063159	0.1736440
176	Homovanillic acid	forward	181.0505673	67.19915	4.426675	8.099991	3.876372	5.736999	10.501028	7.481298	4.164109	6.635866	1.057656	6.648783	4.78076833333333	6.605158	6.507660	5.650611	4.533891	4.867213	5.121098	4.118466
177	Pseudouridine	forward	243.0627045	259.5315	0.16919048	0.31263103	0.24149025	0.09593646	0.15950325	0.18884484	0.26786360	0.13893786	0.15109878	0.14389296	0.1446432	0.12242780	0.04813562	0.05375122	0.02887066	0.11656815	0.07514935	0.08870206
178	"1,9-Dimethyluric acid"	forward	195.050878	392.122	1.152885e-02	1.699013e-02	4.170002e-03	2.985114e-03	1.631047e-02	2.303185e-02	6.637319e-03	7.403191e-03	7.176278e-03	6.808824e-03	0.007129431	3.109060e-03	1.056154e-04	1.199492e-03	9.183557e-05	1.021925e-04	3.172805e-03	1.242830e-03
179	"5,7-dihydroxy-3-{[3,4,5-trihydroxy-6-(hydroxymethyl)oxan-2-yl]oxy}-2-(3,4,5-trihydroxyphenyl)-4H-chromen-4-one"	forward	481.0949171	277.04	0.0132562957	0.0151728138	0.0358605356	0.0214076536	0.1175771628	0.0028566983	0.0099029470	0.0058688398	0.0071812734	0.0062035681	0.00641789376666667	0.0001780858	0.0001056154	0.0020281613	0.0045171805	0.0001021925	0.0002682890	0.0004152721
180	Eudesmic acid	forward	211.0610957	82.66045	0.08680598	0.03514739	0.07780302	0.05583365	0.05202485	0.02436434	0.04176945	0.07949663	0.08867592	0.07434271	0.08083842	0.10108913	0.05594598	0.11190083	0.07379356	0.09334646	0.04844813	0.14221467
181	"3,4-Dihydroxy-trans-cinnamate"	forward	179.0348134	34.76185	0.3608611	0.4325935	0.4256848	0.3418792	0.6382118	0.7843899	0.4164260	0.9972932	1.0623153	1.0582218	1.03927676666667	1.2093705	1.3962803	1.4085769	1.5024222	1.2739242	1.2003044	0.8608212
182	3'-AMP	forward	346.0569373	420.6	0.10179900	0.33581365	0.24629957	0.20778632	0.33115746	0.35473155	0.23643758	0.22734638	0.23890030	0.23316083	0.233135836666667	0.14367155	0.08587704	0.21202478	0.05451672	0.35494194	0.12529490	0.06481510
183	Suberic acid	forward	173.0816301	169.4135	0.03440208	0.02163102	0.02520049	0.03665171	0.02737954	0.02192784	0.05218773	0.09609177	0.13832187	0.13955863	0.124657423333333	0.13428142	0.17824088	0.23037854	0.18235978	0.15417649	0.13691365	0.10850955
184	N-Acetylleucine	forward	172.0976215	212.118	0.15624813	0.53387847	0.34899754	0.38539874	0.57234426	0.28989676	0.25203695	0.24852711	0.24279902	0.23654218	0.24262277	0.13085015	0.07594886	0.18760636	0.17641979	0.15268669	0.17736602	0.14150557
185	Gentisate aldehyde	forward	137.0241124	96.071	0.2848072	0.2661652	0.2875139	0.2465662	0.2942896	0.1803931	0.7839179	0.8143001	0.3910131	0.3447843	0.516699166666667	0.2611242	0.3788149	0.3886180	0.3286061	0.4295778	0.3642587	0.3284244
186	N-Acetylserine	forward	146.0456258	317.673	0.30112672	0.43683958	0.28280988	0.20092439	0.22739401	0.36092898	0.16687845	0.23661300	0.25495045	0.24110977	0.244224406666667	0.15422844	0.10285977	0.16451316	0.03146616	0.18058073	0.17004501	0.15401638
187	L-Theanine	forward	173.0930259	274.6685	0.05296092	0.04381773	0.05380081	0.01588498	0.04772184	0.04026420	0.04971795	0.03117927	0.03068572	0.02986318	0.0305760566666667	0.04786718	0.04347289	0.10429618	0.03869721	0.03234259	0.05909415	0.01432087
188	"1,6-Digalloyl-beta-D-glucopyranose"	forward	483.0730142	272.2655	3.120568e-03	4.245311e-03	3.046793e-03	3.223745e-03	4.538708e-03	1.160932e-03	3.397994e-03	7.514217e-04	2.209368e-03	2.447663e-03	0.00180281756666667	8.652674e-05	1.056154e-04	3.466791e-04	9.183557e-05	1.021925e-04	3.837665e-04	7.629124e-05
189	L-Threonine	forward	118.0504451	367.9155	0.38334986	0.82182615	0.25600784	0.22421424	0.37434242	0.46040550	0.29907666	0.28122760	0.26542283	0.26048697	0.2690458	0.13664019	0.07396994	0.12873434	0.05426307	0.12989531	0.21887766	0.13465647
190	L-Erythrulose	forward	119.034611	331.292	1.0360678	1.8183525	0.5197239	0.4788646	0.7452549	0.8204173	0.4464597	0.4999378	0.5344103	0.4905440	0.508297366666667	0.4576300	0.5442864	0.6745444	0.4713793	1.1079162	1.4274138	0.4039982
191	Isobutyrylglycine	forward	144.0662191	67.94945	9.556285e-05	1.103389e-04	9.233526e-03	9.408097e-05	3.792378e-03	3.005810e-02	2.103093e-03	2.317951e-02	1.308465e-02	1.379245e-02	0.0166855366666667	3.127234e-02	5.910240e-02	2.858392e-02	1.786432e-02	3.896846e-02	2.330552e-02	1.403050e-02
192	Quercitrin	forward	447.0939638	185.681	0.054547825	0.123108909	0.068354249	0.069719415	0.045204118	0.065082739	0.024367688	0.027254221	0.029529283	0.035347938	0.0307104806666667	0.015055446	0.007431459	0.006112647	0.013791898	0.005368869	0.009849667	0.014090887
193	N-Acetylvaline	forward	158.081907	207.799	0.04648991	0.16414014	0.07024140	0.06089415	0.11317638	0.08965283	0.12238775	0.12885306	0.12665310	0.12242259	0.12597625	0.25106889	0.08594032	0.09924406	0.10480684	0.21052096	0.17603087	0.18235815
194	Succinic anhydride	forward	99.00826851	141.634	0.09000756	0.10029433	0.08409641	0.07620915	0.14009848	0.11060945	0.08996646	0.13276271	0.12736763	0.13078408	0.130304806666667	0.15853231	0.15994389	0.17465460	0.18228845	0.15553284	0.14760787	0.11601334
195	Phthalic acid	forward	165.01922	353.5405	9.556285e-05	3.000106e-02	8.740065e-03	9.408097e-05	1.030738e-04	9.125434e-05	8.542403e-05	1.012606e-04	4.759713e-02	2.972470e-02	0.0258076968666667	3.592355e-01	1.335763e-01	3.633225e-01	1.509694e-02	1.922580e-01	1.915207e-02	1.915676e-01
196	Kaempferol	forward	285.0411072	162.694	0.042224107	0.018612557	0.044939988	0.011897712	0.057308510	0.009783839	0.046987582	0.089675466	0.044930247	0.045884361	0.060163358	0.048077289	0.109912667	0.048796060	0.081110122	0.051811211	0.055820394	0.106240316
197	myo-Inositol	forward	179.0557759	408.3995	0.07631960	0.04866182	0.02635381	0.01957225	0.02586623	0.14764030	0.02624982	0.04902310	0.04982190	0.04982224	0.0495557466666667	0.03527396	0.02216496	0.03256592	0.01345633	0.04132407	0.03240954	0.02560361
198	Undecanoic acid	forward	185.1544625	49.6591	0.2353600	0.3007644	0.2342797	0.4131749	0.3779282	0.3071460	0.3425879	0.3422261	0.3482074	0.3447664	0.345066633333333	0.2043152	0.3521840	0.2141387	0.2467720	0.2163620	0.0310643	0.1651488
199	6-Keto-prostaglandin F1a	forward	369.2296541	203.018	0.01817562	0.02269386	0.01983381	0.02319815	0.03263404	0.02107021	0.02318375	0.05031377	0.10986199	0.04959276	0.06992284	0.05174583	0.03276640	0.06793268	0.09859737	0.04140176	0.07326966	0.05158002
200	(?¡À)-Tryptophan	forward	203.0926266	279.725	0.18085277	0.18819456	0.14022777	0.01068103	0.09410810	0.19485198	0.12528855	0.10460509	0.03052093	0.10043811	0.0785213766666667	0.04380215	0.04412846	0.04738426	0.08007756	0.02280890	0.09619323	0.03005449
201	Butylparaben	forward	193.0871786	117.2915	2.2589121	2.0815661	1.9723871	2.9865270	2.8727122	3.1980134	2.4891715	1.2965484	1.4297132	1.4266993	1.3843203	0.4126725	0.5130599	0.3401386	0.3596147	0.4774480	0.5092899	0.2205693
202	Purine	forward	119.0358572	100.821	0.16142275	0.97497203	0.08468223	0.08932735	0.34634739	0.14620523	0.07031556	0.09840966	0.09174004	0.10118344	0.0971110466666667	0.05470546	0.05001952	0.05533799	0.07544762	0.07516743	0.04884546	0.07442477
203	"3,4-Dimethoxybenzoic acid"	forward	181.0540856	90.9652	0.3953820	0.6424089	0.3920203	0.3555705	1.1607104	0.1429382	0.6960832	0.5933214	0.4268029	0.3986740	0.472932766666667	1.3059932	0.6973095	0.7541814	2.8164783	0.3140582	0.2780637	0.8438298
204	"8,9-DiHETrE"	forward	337.2394508	168.771	0.013092908	0.007605540	0.006247774	0.033337471	0.008708234	0.003485048	0.051989552	0.030099400	0.035079609	0.038723353	0.0346341206666667	0.024067586	0.022413833	0.030583095	0.084293784	0.032096656	0.038456733	0.023524745
205	Esculentic acid (Diplazium)	forward	487.3443438	59.52805	0.066629819	0.181820072	0.109526575	0.104933295	0.095396208	0.126024373	0.041221643	0.089178055	0.072835200	0.044069622	0.0686942923333333	0.025216080	0.079930603	0.036296907	0.029243530	0.040284342	0.041881841	0.036732550
206	Diacetone alcohol	forward	115.075967	134.633	0.4734138	0.1309363	0.2230655	0.4873766	0.1387710	1.8048682	0.4569682	0.6890914	0.7089563	0.8119535	0.736667066666667	0.5730063	0.1987176	0.8852807	1.1995439	0.3605101	0.5697664	0.3533238
207	3-Methylindole	forward	130.0657549	129.768	0.0022980961	0.0110478047	0.0001033121	0.0022950776	0.0001030738	0.0023159130	0.0171387672	0.2516267894	0.0290636917	0.0310524102	0.1039142971	0.1635886525	0.5577091766	0.4293245448	0.4180964790	0.2679973700	0.1577088888	0.1541177555
208	Tyrosol	forward	137.0605011	67.4295	1.2074723	2.2571783	2.0016317	1.6454439	1.3990306	2.1187492	3.1090429	2.6032958	1.5235025	2.6805254	2.2691079	0.1638717	3.0899615	1.0879939	1.0268611	1.1168871	1.5113373	0.8148296
209	Chorismate	forward	225.0405233	223.1195	0.09857543	0.05763660	0.10471053	0.06640986	0.16702522	0.06176026	0.11307052	0.34916764	0.35983493	0.36630263	0.358435066666667	0.44553953	0.28287838	0.59626619	0.65387594	0.44029478	0.52462839	0.31255215
210	Dihydrojasmonic acid	forward	211.1341925	113.9	0.7291663	0.4282653	0.4840752	0.6995395	0.9967409	1.7209611	0.6597276	0.6796536	0.7340902	0.7230351	0.712259633333333	0.5386923	0.5492295	0.6718711	0.6949574	0.4676792	0.4330941	0.2819550
211	Aldehydo-D-xylose	forward	149.0454143	154.845	3.9284782	5.1538277	3.8508101	2.8250998	3.5758871	3.9615971	3.3702549	3.3041463	3.5702663	3.4902754	3.454896	2.6504382	1.1556154	2.1300487	0.3175604	3.1637102	2.1766636	2.2440741
212	Threonic acid	forward	135.0296337	331.109	0.7520927	1.2649025	0.5607899	0.3398791	0.5228221	0.7810715	0.5918464	0.5638869	0.5893043	0.5659192	0.5730368	0.4364038	0.2551223	0.4291664	0.3308129	0.4403643	0.3583173	0.2433352
213	"3,4-Dihydroxybenzeneacetic acid"	forward	167.0347975	103.413	1.4607018	1.3696226	1.1638008	1.3076435	1.1959539	0.6470928	1.1882391	1.6333323	1.6362031	0.8788623	1.38279923333333	0.7147245	2.2227917	1.2028242	0.9923861	1.4188855	0.6361851	1.1616842
214	Glycyl-Isoleucine	forward	187.1086492	301.903	0.30198100	0.41261349	0.31629180	0.13163026	0.34500683	0.28723011	0.29684220	0.17443015	0.17817275	0.17474954	0.175784146666667	0.03050446	0.05565609	0.05201930	0.04686560	0.05078730	0.07799948	0.05322389
215	4-Methylbenzoic acid	forward	135.0448382	162.142	0.9431930	0.7676711	1.0552115	0.9552454	1.1287615	0.9736374	0.6106968	0.8659206	0.8886554	0.6661972	0.8069244	0.4041917	0.7203262	0.5806863	0.5575863	0.6248418	0.4178144	0.2768576
216	Fasciculic acid B	forward	635.4231707	189.2065	0.0026236648	0.0130972979	0.0071055169	0.0147655685	0.0025194127	0.0036028215	0.0056533844	0.0038277844	0.0052125064	0.0056936408	0.00491131053333333	0.0008113011	0.0048512498	0.0036653548	0.0122773180	0.0098943541	0.0118719403	0.0028233310
217	20-Hydroxy-leukotriene B4	forward	351.2220814	42.223	7.96192973	9.98813273	7.73461481	5.48326753	10.56702727	5.62144510	4.70738161	0.03793399	7.09471548	6.50390935	4.54551960666667	3.62505695	0.08477768	7.99277697	4.91285267	2.35743631	6.43692155	4.11338485
218	"5,7-dihydroxy-2-(4-hydroxy-3,5-dimethoxyphenyl)-4H-chromen-4-one"	forward	329.0674935	43.4204	3.045092	4.506234	3.205460	3.751797	3.484395	2.887478	2.989146	3.651994	4.167407	3.502237	3.77387933333333	3.757438	4.706250	3.182697	3.322499	3.838229	3.575140	4.203831
219	Scopoletin	forward	191.0350519	26.5575	0.05447144	0.06678561	0.05289838	0.06239799	0.08109798	0.04912149	0.07679143	0.10189705	0.10905226	0.10305069	0.104666666666667	0.08458436	0.14863973	0.12836208	0.12055023	0.16796224	0.14743808	0.08467162
220	"3-(3,4-Dihydroxy-5-methoxy)-2-propenoic acid"	forward	209.0456695	363.428	0.02850099	0.03567459	0.02914123	0.02203482	0.01108460	0.02065275	0.02038692	0.04912838	0.05064175	0.04901547	0.0495952	0.05592460	0.05985940	0.04940398	0.06916524	0.05277662	0.05042149	0.03488306
221	"benzene-1,2,4-triol"	forward	125.024021	197.22	0.09515944	0.02072325	0.01788425	0.02539444	0.01804198	0.01101420	0.01929924	0.03877246	0.03597714	0.02734156	0.0340303866666667	0.03094565	0.04814388	0.04408449	0.04373985	0.06142900	0.03530922	0.02056768
222	Shikimic acid	forward	173.0455649	205.654	0.06218932	0.07881703	0.05593187	0.07385442	0.05998670	0.06466581	0.06547974	0.10716084	0.12156827	0.13534077	0.121356626666667	0.12206074	0.17514076	0.14777953	0.16171980	0.16959261	0.15017438	0.07835510
223	N-Acetylmuramate	forward	292.1040561	321.6335	0.43053488	0.52254655	0.35162338	0.21144762	0.47535583	0.60124544	0.40121154	0.32085825	0.31566559	0.30914781	0.315223883333333	0.14013517	0.09054652	0.10595371	0.06184761	0.17979277	0.10603174	0.17594083
224	3-Isopropylmalate	forward	175.0610802	399.9255	0.11782933	0.04781817	0.06066711	0.07862414	0.10231398	0.05844141	0.04237556	0.09138374	0.09601993	0.09156784	0.0929905033333333	0.08342299	0.06550105	0.10639817	0.19396966	0.09762738	0.10305593	0.06923779
225	"2,3-Dinor-TXB2"	forward	341.1976606	311.635	0.10473462	0.08766177	0.08282293	0.09732502	0.09381705	0.08478568	0.08423532	0.26700855	0.28974211	0.27676684	0.277839166666667	0.25612435	0.28514946	0.56248070	0.30803356	0.42876820	0.38659175	0.14363972
226	Zingerone	forward	193.0871746	140.241	0.14309753	0.09073350	0.11510206	0.22482142	0.19966540	0.14558191	0.14704822	0.10477848	0.13082684	0.14093995	0.12551509	0.10370128	0.12605870	0.11613038	0.11282788	0.11556608	0.24309240	0.07559168
227	(-)-Epiafzelechin	forward	273.0770402	206.858	0.004196425	0.062062052	0.030103629	0.046950663	0.039598496	0.031816018	0.049830808	0.069781470	0.079141740	0.068214759	0.072379323	0.081878485	0.084244138	0.094269261	0.118701935	0.078578178	0.094627907	0.051450585
228	3-(3-Hydroxyphenyl)propanoic acid	forward	165.0556229	361.485	9.556285e-05	9.047771e-03	1.033121e-04	1.550837e-02	1.030738e-04	9.125434e-05	8.542403e-05	2.594683e-02	2.498896e-02	2.062069e-02	0.02385216	4.298066e-02	4.256009e-02	4.664170e-02	5.525063e-02	2.887610e-02	3.310413e-02	2.468026e-02
229	3-Methoxybenzenepropanoic acid	forward	179.0711446	167.89	0.262929432	0.047130368	0.044731918	0.041138842	0.038704120	0.008934047	0.054266699	0.088612249	0.075000681	0.069909420	0.0778407833333333	0.334274552	0.129812925	0.112771620	0.151627093	0.413876029	0.114172198	0.065987312
230	2-Methylbenzoic acid	forward	135.0448418	52.4468	0.2169526	0.1723854	0.1627242	0.1964413	0.2525023	0.1762250	0.2302222	0.2451620	0.2409852	0.2440322	0.243393133333333	0.1903732	0.2926764	0.3491918	0.3083027	0.2540265	0.2512125	0.1695203
231	Cyclic AMP	forward	328.04639	288.767	0.18537852	0.35651723	0.30411066	0.31443361	0.71539928	0.54292817	0.42398042	0.38858880	0.41749196	0.39517206	0.400417606666667	0.14931971	0.06219832	0.15710764	0.06804945	0.21863582	0.16125347	0.09487586
232	dCMP	forward	306.0504597	454.831	0.001534017	0.005443751	0.010310903	0.009192926	0.001850749	0.011955031	0.010252197	0.008377001	0.008364823	0.007091194	0.00794433933333333	0.004843686	0.003906666	0.004264866	0.008187812	0.012510495	0.001267052	0.001102978
233	N-Acetyl-L-alanine	forward	130.0505831	269.4405	0.8182548	0.9358645	1.1635361	0.6561929	0.6241392	0.6119262	0.2785640	0.8955555	0.9528770	0.9156983	0.921376933333333	0.2375558	0.5020071	0.7795123	0.3800303	1.9024275	0.4943799	0.3947438
234	Byssochlamic acid	forward	331.1194936	368.056	0.005199724	0.005434497	0.003257615	0.006404980	0.001734282	0.004094135	0.003591212	0.007739363	0.004994322	0.005670045	0.00613457666666667	0.003393617	0.003627095	0.011946327	0.008049106	0.005833654	0.002506864	0.003903025
235	Aminoadipic acid	forward	160.0614712	287.816	0.22775924	0.29005789	0.16050063	0.16460621	0.24857087	0.21269456	0.15337246	0.18870817	0.19152467	0.19925651	0.193163116666667	0.12065266	0.06139503	0.11017308	0.06858801	0.11439584	0.16476929	0.10871127
236	Deoxyribose 1-phosphate	forward	213.016907	446.564	0.008431707	0.015065614	0.012929629	0.016290814	0.005548751	0.034104550	0.039814724	0.014968055	0.015573301	0.016614252	0.015718536	0.011268126	0.015573589	0.020682415	0.034804635	0.023781516	0.014161274	0.008134522
237	N6-Acetyl-L-lysine	forward	187.1085943	366.223	0.05118656	0.16124108	0.04001594	0.03357824	0.06347318	0.05013488	0.05960923	0.11326367	0.10237892	0.07518271	0.0969417666666667	0.07022110	0.13242730	0.11073371	0.26364244	0.16941852	0.23403087	0.05913760
238	Benzenebutanoic acid	forward	163.0762743	72.79355	0.2968496	0.2023582	0.2254145	0.3951925	0.2650090	0.1989782	0.3255112	0.2669275	0.2896364	0.2448008	0.267121566666667	0.1972513	0.2673696	0.2761328	0.2893715	0.4500838	0.1744853	0.2309309
239	4-Acetamidobutanoic acid	forward	144.0662261	227.9655	0.04882462	0.06269245	0.04022440	0.02705707	0.05013731	0.02976354	0.06264936	0.07465506	0.07564949	0.06991965	0.0734080666666667	0.10153808	0.06430638	0.06409804	0.06562539	0.09286360	0.08392444	0.07412128
240	N-Acetyl-L-phenylalanine	forward	206.0822146	202.257	0.003765530	0.183977614	0.108458984	0.093064872	0.159275504	0.095035494	0.098996758	0.113130760	0.115972722	0.108212409	0.112438630333333	0.011475363	0.049364249	0.099373687	0.082969674	0.104022394	0.072322228	0.007006111
241	4-Hydroxycinnamic acid	forward	163.0399089	33.4832	0.07320757	0.07122316	0.07173868	0.08012351	0.07771237	0.04585878	0.05943692	0.11869224	0.17059899	0.14454571	0.144612313333333	0.10898277	0.19520027	0.13913689	0.14347873	0.15705205	0.16565253	0.08552593
242	L-Tyrosine	forward	180.0665143	320.8845	0.6045040	1.0406079	0.5210939	0.3490567	0.4960838	0.5494793	0.4203071	0.4812000	0.5414688	0.5191041	0.5139243	0.3905101	0.2192551	0.3270753	0.1811610	0.3033483	0.5778500	0.2900665
243	20-Hydroxy-PGF2a	forward	369.2295546	279.82	0.04698821	0.03185375	0.04914513	0.03317385	0.04396850	0.03265110	0.02239385	0.04450187	0.04916743	0.04876593	0.04747841	0.04003465	0.06349032	0.06219155	0.03759392	0.04664876	0.04420318	0.02538581
244	Cytidine	forward	242.0789154	256.778	0.03012930	0.02151313	0.06710715	0.03492482	0.06696420	0.07466585	0.04425919	0.04725009	0.04556762	0.04334244	0.0453867166666667	0.02038602	0.05196642	0.02875086	0.04559546	0.02379632	0.02370261	0.02704777
245	2-Furoic acid	forward	111.0082785	30.0375	0.03155721	0.26883315	0.02603826	0.02311960	0.02536157	0.01841979	0.01981696	0.03969038	0.03664805	0.04313892	0.0398257833333333	0.03212437	0.04379257	0.05023996	0.04578409	0.05313197	0.03522261	0.02827953
246	2-Furoylglycine	forward	168.0300923	44.0336	0.9488628	0.9441980	0.9504993	1.4423347	1.1411774	0.7632828	1.0987349	3.1597854	3.4568512	3.2933016	3.30331273333333	4.0917768	4.8233063	5.9895017	6.0870592	5.2960618	4.3445107	2.3673285
247	3-Hydroxysebacic acid	forward	217.1082148	272.416	0.02376154	0.23768138	0.01895776	0.01962263	0.28548090	0.17470857	0.27533486	0.05369469	0.11226904	0.05340573	0.0731231533333333	0.08134614	0.08612185	0.09886797	0.13446023	0.10052913	0.09420675	0.05064252
248	Phenylethyl primeveroside	forward	461.1611124	177.958	0.4611412	0.5999097	0.6096928	0.5674792	0.5501468	0.3955835	0.3880491	0.5244187	0.5638748	0.5109139	0.533069133333333	0.2512195	0.3256080	0.3565916	0.5356771	0.4892758	0.3276580	0.2538661
249	Cyclic GMP	forward	344.0405745	340.958	0.04353179	0.08153111	0.06975756	0.05649763	0.22031822	0.12427205	0.09676296	0.01947291	0.09055994	0.08371535	0.0645827333333333	0.06130643	0.03609683	0.06236697	0.02819282	0.10357875	0.05873900	0.03376461
250	Mesylate	forward	94.9802729	128.5815	1.721812	3.831710	3.747687	1.691509	2.941560	3.642367	7.021525	12.876671	8.516601	5.900192	9.09782133333333	7.177568	6.398126	8.610102	9.909615	8.834416	7.160304	5.197742
251	2-Ethyl-2-Hydroxybutyric acid	forward	131.0709321	246.131	1.3235031	1.1378658	1.0166750	1.0710343	0.9196769	1.3431067	1.2939962	1.3771096	1.3995117	1.3398203	1.3721472	1.2947929	1.2483110	1.4802701	1.4880972	1.8854172	1.2917303	0.6964645
252	2-Methylguanosine	forward	296.1005915	215.021	0.024152357	0.055544229	0.051971967	0.017685908	0.024624834	0.032723658	0.052368504	0.031004440	0.032711223	0.031538784	0.0317514823333333	0.024826296	0.011182924	0.011004841	0.008306133	0.022603977	0.018838757	0.022990517
253	Traumatic acid	forward	227.1292074	70.68755	0.7159592	0.4236206	0.9136315	0.9028289	0.7678529	1.4513417	0.8127282	1.3181300	1.3721119	1.5377356	1.40932583333333	1.5364404	2.4295687	1.6744654	1.5209796	1.8117238	1.5527666	0.9902542
254	Hesperetin	forward	301.0721945	29.6704	0.2853204	0.2514283	0.2204982	0.2479531	0.1905842	0.2929347	0.2129165	0.3110076	0.3975920	0.3058427	0.338147433333333	0.2210346	0.4547802	0.2703229	0.3633510	0.2424986	0.2870272	0.3224101
255	Genipin	forward	225.0767582	39.91	0.2405775	0.1694901	0.2747115	0.1967991	0.2326781	0.1270335	0.2242973	0.2603099	0.3019703	0.2641921	0.275490766666667	0.1957404	0.2702237	0.2833996	0.3151795	0.2820522	0.2759249	0.1393488
256	Arecaidine	forward	126.0557045	211.645	0.02286903	0.02472000	0.02240483	0.03112960	0.03012354	0.02772201	0.03024592	0.02378431	0.02715280	0.02708183	0.0260063133333333	0.02168207	0.02283486	0.02526009	0.03651626	0.02544712	0.02014816	0.01327927
257	Quinolinic acid	forward	166.0143225	51.7451	0.6554561	0.5629687	0.3931565	0.5834289	0.2858011	0.9317820	0.5116868	0.3260390	0.9122914	0.8538228	0.6973844	0.8985226	1.3038251	1.1195732	0.7839892	1.0656770	0.7831287	0.5678345
258	(R)-Kawain	forward	229.0870122	207.217	0.4830673	0.5682241	0.3927269	0.5985142	0.5227380	0.4369050	0.6490482	0.8870705	0.9621012	0.8435198	0.897563833333333	1.0985455	1.0537251	0.9562389	1.0858023	1.3560344	1.1236829	0.7128141
259	Ribose 1-phosphate	forward	229.0123907	453.025	0.009485892	0.020691070	0.009991446	0.007140071	0.015288139	0.018466485	0.076469753	0.025554208	0.022935828	0.018604108	0.0223647146666667	0.011716804	0.012440023	0.015666302	0.010667490	0.024840279	0.013869625	0.001324372
260	LysoPA(18:1(9Z)/0:0)	forward	435.2530039	268.626	0.003482314	0.003813689	0.002344127	0.002393049	0.001498667	0.004527595	0.001882909	0.002957902	0.002397578	0.002704138	0.00268653933333333	0.001774234	0.001543267	0.003224434	0.001575519	0.002314272	0.001507876	0.002152950
261	4-Pyridoxic acid	forward	182.0458419	41.0289	0.4298387	0.1140628	0.4419894	0.0967078	0.1353318	1.4589636	0.2809285	0.3635665	0.4266081	0.3510374	0.380404	0.3091296	0.3687970	0.6243540	0.7568014	0.3704883	0.2477762	0.1856682
262	Deoxyinosine	forward	251.078965	193.506	1.0737207	2.0907775	2.4258839	0.8610629	0.6291326	1.9274381	2.2193317	1.1788704	1.2265355	1.1989372	1.2014477	0.6229220	0.3200661	0.3136643	1.2215994	0.6411013	0.3799746	0.5380303
263	1-deoxy-1-(N6-lysino)-D-fructose	forward	132.02997	441.763	0.06242647	0.11128066	0.04813210	0.06627995	0.05477348	0.06220510	0.05531801	0.05406712	0.05627755	0.05006049	0.0534683866666667	0.04955101	0.02056412	0.03953363	0.02662145	0.04546936	0.04199619	0.03829590
264	Epsilon-(gamma-Glutamyl)-lysine	forward	274.1412045	471.974	0.037469403	0.086301850	0.020870229	0.016817284	0.025572590	0.047621488	0.031598050	0.026482121	0.027918959	0.026718926	0.027040002	0.009557078	0.005750679	0.010466242	0.003858735	0.008444206	0.019691136	0.007575120
265	Meconine	forward	193.0505304	211.27	0.02916343	0.02809408	0.03868450	0.02228000	0.02866181	0.01933419	0.02034822	0.03056128	0.03403060	0.09774365	0.0541118433333333	0.03831370	0.05349409	0.07116844	0.03723296	0.04189355	0.11462647	0.02264292
266	Guanosine	forward	282.0846986	283.5555	0.4297153	0.5852390	0.3903283	0.1543646	0.7404866	0.3301695	0.8484938	0.3804149	0.3783365	0.3642971	0.3743495	0.1826157	0.1348101	0.1364438	0.1248328	0.2218183	0.1208821	0.2009419
267	Alanyl-Leucine	forward	201.1245148	275.59	0.26834816	0.16654359	0.29272091	0.08812513	0.22382899	0.13833688	0.14440361	0.10846737	0.06665064	0.11274562	0.0959545433333333	0.01537821	0.03139312	0.02395103	0.03820710	0.01843407	0.02563928	0.02046619
268	LysoPE(18:1(9Z)/0:0)	forward	478.2945016	220.7095	0.24590051	0.56573230	0.39000820	0.25871224	0.21227689	0.42361428	0.22234895	0.25714592	0.26161245	0.25311092	0.257289763333333	0.11162344	0.36094322	0.20866477	0.11836106	0.17897460	0.02482714	0.08987549
269	Ascorbyl palmitate	forward	413.2552388	216.5625	0.003216796	0.002146584	0.002468364	0.004545043	0.007105516	0.002010930	0.003370653	0.011420472	0.011183418	0.007694774	0.0100995546666667	0.010804362	0.010167303	0.015360953	0.014159510	0.012255732	0.009488161	0.006514942
270	Epicatechin	forward	289.0724106	62.4039	0.2137017	0.3644071	0.1399282	0.4683935	0.2272323	0.4373412	0.1541310	0.4139069	0.4367478	0.4115322	0.420728966666667	0.6000295	0.5434475	0.4013718	0.2510820	0.5095720	0.5466369	0.3377877
271	Monoethyl phthalate	forward	193.0503973	48.2381	0.13779031	0.10097861	0.04313352	0.14046519	0.12830443	0.09221007	0.15268627	0.30228968	0.30836615	0.26831075	0.29298886	0.38906826	0.57235853	0.43398584	0.39874145	0.36970280	0.18954874	0.24643333
272	Puerarin	forward	415.1039626	101.2355	0.004522700	0.003845069	0.005106044	0.011068982	0.009148491	0.002816767	0.010645246	0.012185894	0.018045797	0.013372554	0.0145347483333333	0.014494218	0.007902251	0.013828059	0.002473132	0.007833175	0.014991344	0.004194396
273	Xanthurenic acid	forward	204.0303782	81.9656	0.04200337	0.04703913	0.06121638	0.07457083	0.08251805	0.04982889	0.04981348	0.13222512	0.16083553	0.20738375	0.1668148	0.17883350	0.28140014	0.17627898	0.24082451	0.15482398	0.34155743	0.12201220
274	"(2E,4E)-2,4-Hexadienoic acid"	forward	111.0446907	218.652	0.02662774	0.02950097	0.03123406	0.02027096	0.02353536	0.02598477	0.02893062	0.01931066	0.02134103	0.02224433	0.02096534	0.03278924	0.06734592	0.04813143	0.06071753	0.04938362	0.03354570	0.02050562
275	Resveratrol	forward	227.071329	156.994	0.6020465	0.8145909	0.4814068	0.5207436	0.2823792	0.9560953	0.9158797	0.8645780	0.8196724	0.8242031	0.836151166666667	0.1249999	0.4565781	0.3220185	0.9825436	0.7792702	0.8406775	0.5066888
276	Xanthosine	forward	283.0686763	237.833	6.458371e-02	2.894158e-01	1.078638e-01	3.141762e-02	8.526137e-02	6.509287e-02	3.287331e-01	7.579081e-02	7.607080e-02	7.472920e-02	0.07553027	2.057738e-02	1.056154e-04	3.366779e-03	9.183557e-05	4.789647e-02	3.114735e-02	1.789100e-02
277	"3,4,5-Trimethoxycinnamic acid"	forward	237.0767244	24.7758	1.656441	2.097093	1.771073	2.098042	1.874164	1.537322	1.880181	2.914913	2.899149	2.704515	2.83952566666667	2.774215	4.535260	3.308436	2.467594	3.158738	2.990997	2.292929
278	Bisdemethoxycurcumin	forward	307.0955492	323.2665	0.04301409	0.03378797	0.03508789	0.04012919	0.04033487	0.02436872	0.04455700	0.04546198	0.05127922	0.02791780	0.041553	0.04013847	0.03963764	0.04308713	0.04062493	0.05499129	0.03750061	0.02527338
279	4-Hydroxystyrene	forward	119.0496724	33.47865	0.24397037	0.24712756	0.20512038	0.28417733	0.24425952	0.17622897	0.28126756	0.29750574	0.30130195	0.28262898	0.293812223333333	0.25676488	0.33541957	0.38396398	0.51136894	0.36228267	0.29924595	0.19797363
280	Homoveratric acid	forward	195.0662167	53.714	0.3601177	0.8451971	0.6108969	0.8162468	0.3739135	0.4076125	0.3537458	0.8761992	0.9075485	0.8479709	0.877239533333333	0.8110522	0.9997961	1.6117822	0.9053551	0.9285072	0.7579396	0.8683034
281	Phenylacetic acid	forward	135.0448352	322.389	0.10387467	0.26568207	0.09242107	0.08525350	0.62879635	0.28376891	0.05155331	0.09259134	0.09856066	0.10408336	0.0984117866666667	0.07095080	0.11477371	0.12123791	0.09220701	0.17905065	0.07760694	0.05893687
282	Citramalic acid	forward	147.0297738	198.7795	0.04207532	0.03999021	0.06638843	0.02834481	0.05001558	0.01582819	0.02679711	0.02578450	0.02035419	0.02933086	0.0251565166666667	0.02147363	0.02427813	0.02882191	0.03454299	0.03790711	0.03607295	0.01677890
283	alpha-Ketoisovaleric acid	forward	115.0395443	218.9105	0.74165952	0.11122888	0.11400249	0.11122911	0.17586119	0.09071988	0.09221205	0.24789224	0.25249109	0.23775912	0.246047483333333	0.16510568	0.22758374	0.23645061	0.20772064	0.21660144	0.21667628	0.14392579
284	Aspartylphenylalanine	forward	279.0880344	362.752	0.0046952553	0.0064434996	0.0008404096	0.0007836102	0.0005458296	0.0009858725	0.0012425235	0.0057523428	0.0023208494	0.0023776338	0.00348360866666667	0.0030113413	0.0054256609	0.0058680334	0.0049760600	0.0057926808	0.0107696071	0.0022771856
285	"5,7-dihydroxy-2-(4-hydroxyphenyl)-6-[3,4,5-trihydroxy-6-(hydroxymethyl)oxan-2-yl]-4H-chromen-4-one"	forward	431.0998752	245.59	7.404118e-03	9.272352e-03	4.273351e-03	2.998903e-03	1.030738e-04	9.125434e-05	5.115109e-03	6.060060e-03	1.750470e-03	6.532958e-03	0.00478116266666667	4.945410e-03	5.834316e-03	4.310409e-03	5.494701e-03	1.334627e-03	5.537562e-03	1.689409e-03
286	Eriodictyol	forward	287.0566268	61.88205	0.28077478	0.11251505	0.09836377	0.19877945	0.13440551	0.09396823	0.09269983	0.31298365	0.33152808	0.29380170	0.312771143333333	0.39485725	0.46852036	0.43260013	0.41647929	0.40588646	0.35699731	0.23061401
287	Ortho-Hydroxyphenylacetic acid	forward	151.0399178	215.425	1.5409462	1.1614554	0.8937718	0.7092820	0.7877008	0.9039422	0.7570738	1.0861613	1.1163245	1.0616839	1.08805656666667	0.7316412	1.3244829	1.1389529	0.9677781	0.5252572	1.3263388	0.3657600
288	Phenol glucuronide	forward	269.067388	31.3688	0.1557663	0.1320719	0.1940633	0.2549247	0.3300081	0.1312117	0.2418717	0.3318846	0.4716051	0.4500557	0.417848466666667	0.6564114	0.6327641	0.7828617	0.2775538	0.7762596	0.3220097	0.2356610
289	"2-benzoylbenzene-1,3,5-triol"	forward	229.0507128	191.612	0.12123657	0.22304593	0.08629034	0.09097672	0.11211970	0.12750405	0.18349330	0.16309238	0.14546254	0.16017563	0.156243516666667	0.16233767	0.14873711	0.19092807	0.20932546	0.18113561	0.16989096	0.13071215
290	Succinylacetone	forward	157.0503615	253.1055	4.204057e-01	5.100701e-02	2.431202e-01	3.169168e-02	1.204629e-01	9.125434e-05	8.161220e-02	4.750578e-02	4.879788e-02	2.841492e-02	0.04157286	2.830039e-02	1.056154e-04	9.158528e-05	9.183557e-05	2.342616e-03	9.156933e-05	2.378055e-02
291	Petroselinic acid	forward	281.2492526	72.78435	0.46949415	0.56206998	0.39501886	0.02197064	0.62643093	0.03944921	0.38980735	0.21316982	0.33552227	0.27035325	0.273015113333333	0.08680819	0.06430863	0.18940823	0.11166802	0.18621623	0.07700354	0.08839647
292	Jasmonic acid	forward	209.1186363	171.299	0.02717026	0.02578387	0.02515335	0.02996904	0.03805665	0.03155275	0.03238305	0.07505181	0.04707419	0.04389007	0.05533869	0.05433657	0.09455274	0.04931358	0.06481463	0.10386620	0.04676122	0.04943552
293	3-Hydroxyvaleric acid	forward	117.0551901	249.833	0.4499574	0.3662449	0.4250946	0.4154877	0.4527068	0.3785472	0.3655103	0.5894349	0.5909900	0.5500988	0.576841233333333	0.5892190	0.7476665	0.6591648	0.6283042	0.7135324	0.5725401	0.3392129
294	Deoxyadenosine monophosphate	forward	330.0620205	431.865	0.0004902285	0.0019477155	0.0063792412	0.0037094045	0.0064616787	0.0063334722	0.0034382936	0.0041208480	0.0045403862	0.0043868271	0.00434935376666667	0.0043184667	0.0028904436	0.0038535713	0.0047159944	0.0097394355	0.0007451990	0.0010288724
295	gamma-Aminobutyric acid	forward	102.0555378	410.4945	0.11377968	0.17834615	0.06299916	0.05947916	0.09155317	0.09457796	0.08637108	0.08096769	0.08216315	0.07716253	0.08009779	0.06199873	0.03517597	0.03428078	0.02829807	0.05288341	0.04343991	0.03874820
296	Rhapontigenin	forward	257.082724	153.398	1.773525	2.183258	1.179015	2.175777	1.809616	1.737542	1.900149	2.310530	2.091706	2.123146	2.17512733333333	1.589592	1.545047	2.118963	2.049431	1.628909	1.881080	1.596225
297	Alpha-Hydroxyisobutyric acid	forward	103.039515	253.989	0.27534949	0.05270532	0.03281054	0.03978544	0.03229054	0.06513027	0.03483564	0.32999936	0.10678146	0.10229830	0.17969304	0.04176571	0.30257921	0.22516915	0.27292046	0.18471638	0.91131453	0.06670964
298	L-Malic acid	forward	133.013979	515.532	0.03871423	0.12600678	0.02458167	0.05103472	0.09001494	0.04305680	0.08396269	0.02843869	0.09116566	0.10235136	0.0739852366666667	0.05835141	0.04384218	0.04860479	0.04930775	0.06738292	0.02642994	0.04772350
299	Galactinol	forward	341.1097624	384.199	0.2944786	0.3277207	0.2861824	0.3096208	0.3650165	0.1513406	0.2593228	0.3162426	0.2922219	0.2999930	0.302819166666667	0.1025995	0.1845689	0.2543590	0.3727923	0.1984525	0.2114226	0.1404615
300	Sedoheptulose	forward	209.0667783	155.2985	2.7387455	3.5998246	2.6716012	2.1247325	2.5475809	2.7749650	2.4970966	2.6104730	2.6187870	2.5322634	2.58717446666667	2.1407195	1.3729067	1.7888732	0.9015137	2.7284966	1.7858955	1.8498234
301	3-Hydroxyisovaleric acid	forward	117.0552203	218.351	0.14483322	0.03176603	0.19315873	0.16177012	0.09976708	0.10214579	0.13514590	0.16398926	0.16310791	0.15669671	0.161264626666667	0.08103337	0.18894939	0.15576631	0.16126742	0.10006987	0.15773345	0.12310536
302	"1,5-Anhydrosorbitol"	forward	163.0611126	270.421	0.033983325	0.012281308	0.018964461	0.008272761	0.017568574	0.088884900	0.015167202	0.029776526	0.034827200	0.035253142	0.0332856226666667	0.030739688	0.036217206	0.038418707	0.034982443	0.039093918	0.023768130	0.012241724
303	p-Hydroxyphenylacetic acid	forward	151.039856	35.23055	1.543783	1.352990	1.491511	1.449843	1.607354	1.105837	1.298061	1.939679	1.984241	1.826097	1.91667233333333	1.536513	1.961221	1.748213	2.258648	1.989080	1.869640	1.293463
304	Cytidine monophosphate	forward	322.0455952	448.437	0.01786057	0.06249903	0.08243361	0.03238149	0.05724475	0.07691040	0.07118704	0.05404121	0.05692808	0.05537326	0.0554475166666667	0.04187033	0.01486085	0.04793946	0.01614223	0.09680630	0.02199064	0.01402450
305	Rotenone	forward	393.1312945	32.2382	0.07305031	0.08671042	0.07493414	0.06446558	0.08959569	0.03519737	0.05946121	0.07412900	0.06125284	0.05331877	0.0629002033333333	0.02359007	0.04455707	0.04324587	0.06782297	0.04195748	0.04667757	0.03452766
306	Cysteine-S-sulfate	forward	199.9694926	328.4445	0.0153177696	0.0629891965	0.0389125589	0.0376086746	0.0366414709	0.0464570522	0.0212054467	0.0243877645	0.0295029252	0.0274553552	0.0271153483	0.0050044133	0.0001056154	0.0176122598	0.0172573094	0.0024244600	0.0181862983	0.0029246967
307	4-Methoxycinnamic acid	forward	177.0556871	34.55635	0.70498927	0.96161190	0.71950067	0.69013809	0.78638086	0.42150197	0.71542788	0.67617512	0.73735342	0.66318252	0.69223702	0.43560182	0.54000779	0.60794220	0.81611236	0.63410978	0.02512275	0.56151751
308	Allantoin	forward	157.0365865	199.5395	0.18268003	0.12284234	0.08951058	0.11414239	0.07816808	0.12193720	0.11159407	0.25481499	0.27058100	0.26415122	0.263182403333333	0.05651703	0.08034343	0.40463893	0.05787099	0.52334660	0.28721299	0.26929752
309	N-Carboxyethyl-g-aminobutyric acid	forward	174.0772431	310.791	0.03228150	0.02557238	0.02928789	0.02667479	0.02753727	0.04912398	0.03368816	0.03066725	0.03562411	0.03410372	0.0334650266666667	0.02118828	0.03303840	0.02949470	0.01378149	0.03354578	0.01926000	0.01880547
310	"3,4-Dihydroxymandelic acid"	forward	183.0297054	62.0225	0.2268799	0.3974378	0.3576483	0.3082492	0.3569594	0.3585395	0.3581225	0.5755752	0.5682285	0.5845249	0.576109533333333	0.4419905	0.6850665	0.4894214	0.6223912	0.6913894	0.3367244	0.5688935
311	"3,4-Dihydro-6-hydroxy-2,5,7,8-tetramethyl-2H-1-benzopyran-2-carboxylic acid"	forward	249.1138147	170.3145	0.03117446	0.03610612	0.04811423	0.03603671	0.04296076	0.03166473	0.02838675	0.03940328	0.03826331	0.03969735	0.0391213133333333	0.02613251	0.04785880	0.03324318	0.04408489	0.03362720	0.02998896	0.02377984
312	Ascochitine	forward	275.0928172	80.2167	0.06722014	0.06533600	0.01659808	0.08503407	0.04012614	0.03954732	0.04747233	0.13781259	0.13829149	0.14069251	0.138932196666667	0.22331803	0.20895225	0.17775075	0.12123980	0.21123365	0.21338139	0.15295168
313	Tiglic acid	forward	99.04446991	160.537	0.02296492	0.01960818	0.01568408	0.01169974	0.01640248	0.01964178	0.01644892	0.02314741	0.01898634	0.01888593	0.0203398933333333	0.01841820	0.02487928	0.01750495	0.02389395	0.02197689	0.01816903	0.01601678
314	Isohyodeoxycholic acid	forward	391.2858811	50.7143	0.011092303	0.009250246	0.006339981	0.013834637	0.012016226	0.002928520	0.016237203	0.016142011	0.018523395	0.021155501	0.018606969	0.009180221	0.021488672	0.006194903	0.014736388	0.012805098	0.014373543	0.017725703
315	Formylanthranilic acid	forward	164.0352383	226.1865	0.010568531	0.006375045	0.007937275	0.007987930	0.010065000	0.009260741	0.006918582	0.017163576	0.018615149	0.017996661	0.0179251286666667	0.017169249	0.019586757	0.021616107	0.027207766	0.024062876	0.022782909	0.016241908
316	Hypoxanthine	forward	135.0307003	181.3035	43.28616	67.60391	57.34458	36.86001	52.43866	42.93912	43.66998	42.55203	43.16713	41.40847	42.3758766666667	32.22127	25.97539	32.65703	19.84191	38.73475	30.33459	23.21097
317	Ketoleucine	forward	129.0554459	149.64	0.2133102	0.9601371	0.5085956	0.2977838	0.3174191	0.4598055	0.1458533	0.4887656	0.4764875	0.2105129	0.391922	0.7198260	0.4012454	0.1937218	0.2072463	0.3558941	0.2090147	0.3189922
318	Caffeic acid	forward	179.0351227	173.786	0.05271315	0.02875664	0.02546662	0.05063062	0.04562398	0.06613022	0.05389830	0.07213367	0.07933575	0.14527364	0.0989143533333333	0.03770021	0.03681610	0.07128547	0.03864171	0.01503812	0.04380803	0.06499418
319	Uridine 5'-monophosphate	forward	323.0297826	428.613	0.03528110	0.14600543	0.09718252	0.07626495	0.10929836	0.14741155	0.10196980	0.10373975	0.11691663	0.11351586	0.111390746666667	0.09927906	0.03779199	0.10146698	0.03252481	0.20260156	0.05896696	0.03931504
320	L-Homocysteic acid	forward	182.0127751	394.654	0.011575537	0.012622664	0.014383153	0.019284431	0.012616315	0.011910044	0.014442185	0.015922743	0.017219719	0.016871274	0.0166712453333333	0.012022457	0.012772578	0.013365806	0.011980103	0.007322699	0.036061438	0.014862229
321	D-Glucuronic acid	forward	193.0352367	362.478	1.886540e-02	2.239976e-02	1.065959e-02	5.524632e-03	3.317038e-03	1.600711e-02	1.739582e-02	1.566158e-02	1.670878e-02	1.628852e-02	0.0162196266666667	1.527261e-02	3.846988e-03	3.475677e-03	9.183557e-05	1.324411e-02	4.954356e-03	1.780220e-02
322	(2E)-1-(2-hydroxy-4-methoxyphenyl)-3-phenylprop-2-en-1-one	forward	253.08774	203.213	0.015491313	0.024824260	0.014040013	0.018879086	0.017028414	0.009615965	0.013062434	0.032986643	0.023725402	0.030092690	0.0289349116666667	0.027992100	0.032226475	0.040804409	0.059146462	0.047945560	0.053224264	0.012795752
323	(R)-3-Hydroxybutyric acid	forward	103.0395184	133.754	0.009415240	0.002067339	0.014525628	0.007750850	0.017009638	0.015108010	0.015548377	0.010476192	0.013003456	0.007136858	0.010205502	0.003166539	0.008503568	0.010205320	0.003436928	0.009843394	0.011197920	0.021741001
324	Arachidonic acid	forward	303.2337337	44.1642	0.04925810	0.02163285	0.02932321	0.04946691	0.03050961	0.09260606	0.02694145	0.05220692	0.06796234	0.04971704	0.0566287666666667	0.03271018	0.03653059	0.05803926	0.02879667	0.04764031	0.03677756	0.03067593
325	2-Keto-3-deoxy-D-gluconic acid	forward	177.0404389	320.5755	0.17475144	0.03605788	0.05342017	0.03057772	0.02430215	0.12925913	0.01874699	0.05896374	0.04736949	0.04051832	0.0489505166666667	0.02083491	0.01741297	0.01951601	0.01126888	0.02152188	0.01242461	0.02693281
326	2-Hydroxy-3-methylbutyric acid	forward	117.0551816	169.4135	0.1985306	0.3953096	0.4050296	0.2316182	0.6764857	0.4208894	0.2954433	0.6821418	0.6414039	0.6268850	0.650143566666667	0.5146160	1.1659736	0.6590869	1.0051173	0.6833552	1.2826643	0.4864751
327	Sinapyl alcohol	forward	209.082194	184.83	0.05637952	0.06304658	0.02111087	0.05692022	0.06955953	0.06007954	0.06988020	0.08752445	0.09470626	0.08733579	0.0898555	0.14678325	0.15696913	0.06658275	0.04587176	0.11569671	0.11275676	0.09473695
328	2-Isopropylmalic acid	forward	175.0612394	359.5585	0.07057217	0.12236656	0.05609567	0.02560693	0.01066555	0.03135878	0.04753502	0.02955740	0.03945787	0.04711770	0.03871099	0.05735874	0.04535188	0.04348156	0.04323504	0.11164251	0.03723051	0.03149900
329	"1-Methyl-6-phenyl-1H-imidazo[4,5-b]pyridin-2-amine"	forward	223.0975744	198.3545	0.01898539	0.08559107	0.02227359	0.08474925	0.08254867	0.05615072	0.10844054	0.08283915	0.08330123	0.08194157	0.0826939833333333	0.08817796	0.06473625	0.09788340	0.07975498	0.02935004	0.05803447	0.04817572
330	N-Acetylhistidine	forward	196.0727321	331.2865	1.221181e-01	1.000211e-01	4.845380e-02	5.746616e-02	4.393614e-02	4.590582e-02	8.248898e-02	4.699812e-02	5.246486e-02	4.542277e-02	0.04829525	1.211323e-02	4.254173e-02	2.526536e-02	9.183557e-05	4.403115e-02	9.156933e-05	1.207271e-02
331	"2,3-Dinor-6-keto-prostaglandin F1 a"	forward	325.2023039	255.813	0.06870300	0.08609341	0.06690715	0.10319027	0.09641544	0.04955072	0.07922852	0.07554349	0.07432799	0.08121166	0.0770277133333333	0.06102533	0.07004819	0.06833414	0.07517237	0.06492544	0.07579174	0.04225628
332	12-Hydroxydodecanoic acid	forward	215.1651652	81.0613	0.27456276	0.17788128	0.32928446	0.10034543	0.18680875	0.06596792	0.10199606	0.11065514	0.11893871	0.10243222	0.110675356666667	0.07949521	0.17102652	0.12089599	0.27464742	0.10585832	0.12059380	0.07505759
333	Alanylglycine	forward	145.0614385	367.1615	0.026628464	0.054005756	0.046858921	0.060516239	0.059102205	0.057718662	0.053362485	0.012608478	0.016026133	0.061164583	0.0299330646666667	0.069271692	0.019205992	0.008560552	0.013860488	0.013865834	0.007566615	0.038578202
334	Demethoxycurcumin	forward	337.1067573	136.6085	0.05537692	0.04132316	0.07331718	0.06145793	0.04999717	0.01436636	0.03738276	0.07239162	0.07679760	0.07782880	0.0756726733333333	0.02864864	0.05155633	0.05060625	0.04863057	0.02688064	0.02140505	0.02109955
335	PS(16:0/16:0)	forward	734.5008411	205.235	0.004743374	0.022764318	0.003886543	0.005466089	0.002209885	0.008549126	0.004459556	0.003266360	0.004426298	0.003643970	0.003778876	0.005429036	0.003088728	0.006403257	0.007534203	0.003029821	0.009840502	0.012267012
336	Vanillin	forward	151.0399239	141.7115	0.1207723	0.1401090	0.1356044	0.1634879	0.1647127	0.2881912	0.1816591	0.1676095	0.1579258	0.2221451	0.182560133333333	0.1721303	0.2270435	0.1729566	0.2609625	0.1227462	0.1331116	0.1027028
337	"1,2,3-Trihydroxybenzene"	forward	125.0238588	455.6795	0.011329407	0.012355576	0.010932642	0.016999190	0.012623006	0.009480860	0.011093912	0.019180383	0.017505131	0.018956889	0.0185474676666667	0.015737312	0.017985734	0.020787365	0.024832784	0.026020240	0.014317863	0.009273075
338	4-Acetylbutyrate	forward	129.0554361	204.003	0.05039832	0.09637977	0.01247090	0.06885553	0.07056047	0.05835016	0.05940978	0.09914875	0.10920886	0.09691249	0.1017567	0.34196469	0.13044324	0.13789997	0.30076629	0.32765969	0.15537407	0.31533251
339	Cortisol	forward	361.2059705	26.21005	0.40402204	0.09376429	0.06364731	0.10534962	0.19499919	0.24667895	0.42407810	0.15529361	0.15917619	0.16306839	0.159179396666667	0.03728278	0.13096173	0.06256877	0.02561279	0.01169170	0.02403169	0.01476017
340	Propylparaben	forward	179.0711651	68.05915	0.1294085	0.1157414	0.1001194	0.1848916	0.1816181	0.1150831	0.1765894	0.1827117	0.1525638	0.1526314	0.162635633333333	0.1247312	0.1839611	0.1647451	0.1227924	0.1428380	0.1254578	0.1041542
341	Limocitrin	forward	345.0619793	297.856	0.004650655	0.007458422	0.008669870	0.011099823	0.013089291	0.008286523	0.009200994	0.002724957	0.005487543	0.001936469	0.00338298966666667	0.003333010	0.001297082	0.001692350	0.003793686	0.001047192	0.001846877	0.001717338
342	N-acetyl-5-aminosalicylic acid	forward	194.0457281	229.001	0.02714728	0.02087683	0.01606381	0.02699701	0.01758892	0.01989660	0.02403567	0.02229566	0.02529112	0.02002445	0.0225370766666667	0.02032540	0.02526715	0.01940986	0.02210733	0.02057631	0.01927306	0.01010513
343	2-Methylhippuric acid	forward	192.0669603	201.834	0.049733935	0.076091134	0.038724914	0.035699966	0.045672227	0.011966621	0.058638306	0.066296570	0.070914118	0.071335575	0.069515421	0.004640416	0.048349211	0.058130487	0.040947747	0.082020589	0.061896717	0.008206594
344	Deoxyuridine	forward	227.0676308	107.817	0.72356736	1.11737119	2.21678042	0.61200044	0.39045945	1.38727181	2.38221681	0.76610526	0.82703376	0.79886150	0.797333506666667	0.32704939	0.19554377	0.24087656	1.00105091	0.23790051	0.08447788	0.21291777
345	Gentisic acid	forward	153.0189165	328.781	0.03289959	0.02645457	0.02381904	0.02450228	0.02198764	0.02398655	0.02297215	0.04873678	0.05036766	0.04301502	0.0473731533333333	0.05011236	0.09492530	0.07021671	0.11874328	0.06622493	0.10808938	0.03881173
346	Sciadonic acid	forward	305.2493326	44.5206	0.17534642	0.19518765	0.20678422	0.12118969	0.13195006	0.13198082	0.11350986	0.12589303	0.14251226	0.12517163	0.131192306666667	0.02733215	0.06615114	0.06572098	0.06020786	0.06357485	0.04808704	0.06189003
347	3-Hydroxyphenylacetic acid	forward	151.0399284	119.8885	0.37022314	0.19201681	0.29337953	0.28435036	0.36938791	0.12632197	0.35884597	0.23495923	0.55372107	0.47319647	0.42062559	0.42428261	0.59567672	0.54334175	0.59530320	0.08560459	0.47704790	0.15379877
348	Artemetin	forward	387.1100192	56.7708	0.07414645	0.12622356	0.11764652	0.16528501	0.06635845	0.05867956	0.11924525	0.20204000	0.17625744	0.16666711	0.18165485	0.14322012	0.11544442	0.14396701	0.15855009	0.15560320	0.07488067	0.16479897
349	Malic acid	forward	133.0138742	542.915	0.03383348	0.05081812	0.04735293	0.02809096	0.04554627	0.07222643	0.04166722	0.04182280	0.07543575	0.03580342	0.0510206566666667	0.01861777	0.02221222	0.02372585	0.01804685	0.02937842	0.01408402	0.01606614
350	Tiglylglycine	forward	156.0665009	284.4375	0.11925162	0.15912879	0.14101684	0.11196583	0.16486435	0.07534319	0.08629026	0.08577358	0.08534995	0.08809965	0.0864077266666667	0.04460597	0.05046214	0.09499022	0.05689939	0.07390202	0.05279684	0.04291284
351	Guanosine monophosphate	forward	362.0514162	454.2775	0.003137505	0.009783707	0.004460258	0.004196629	0.009068373	0.007114226	0.011513211	0.009613698	0.007642143	0.007753154	0.00833633166666667	0.007461947	0.002401487	0.008752346	0.003154465	0.020497143	0.003900355	0.001225249
352	Isorhamnetin	forward	315.0503493	264.3485	0.005580590	0.017270589	0.014631789	0.010295931	0.014848303	0.007381670	0.007753516	0.005943788	0.009014204	0.007913389	0.00762379366666667	0.013957561	0.009486245	0.012600896	0.010045309	0.011820135	0.012996900	0.007372075
353	Macrocarpal B	forward	453.2628795	157.72	0.2390031	0.3081488	0.2510663	0.1977812	0.2944319	0.1898935	0.2522492	0.1972517	0.2144049	0.1965911	0.202749233333333	0.1097463	0.1269728	0.1374258	0.1985063	0.2676286	0.1394935	0.1514449
354	Inosinic acid	forward	347.0406307	441.712	0.0001911257	0.0074024529	0.0055537057	0.0030206215	0.0023230581	0.0095171793	0.0074486968	0.0065996721	0.0057847907	0.0060688570	0.0061511066	0.0039096697	0.0027097138	0.0083220037	0.0020498524	0.0100988931	0.0045067250	0.0010642947
355	24-Epibrassinolide	forward	479.3381046	35.71145	0.01060910	0.01189454	0.01658945	0.02193801	0.04055591	0.00524529	0.02942974	0.06007546	0.06036700	0.03857960	0.0530073533333333	0.04384878	0.06654164	0.05588716	0.04814077	0.07129081	0.06390911	0.04718083
356	Xanthylic acid	forward	363.0372458	25.80465	0.003727201	0.016327982	0.016140625	0.019727950	0.010442781	0.019694394	0.027131770	0.041530216	0.064022261	0.059308953	0.05495381	0.058888922	0.079090653	0.089698718	0.029273551	0.106286092	0.084194730	0.044323410
357	Epinephrine	forward	182.0823381	234.76	0.04994757	0.06090048	0.06494106	0.07863680	0.06053726	0.05291929	0.03260031	0.05246099	0.05129351	0.05591667	0.0532237233333333	0.03745641	0.03505675	0.03348744	0.04049273	0.03802921	0.03042936	0.03533822
358	N-Glycolylneuraminic acid	forward	324.0945429	407.805	0.036998850	0.011191986	0.001804716	0.006630154	0.005084216	0.007934301	0.010044369	0.026248682	0.029191361	0.024198525	0.0265461893333333	0.005226003	0.012743514	0.046502391	0.018236855	0.026039086	0.023184274	0.017588958
359	3-Hydroxyanthranilic acid	forward	152.03501	54.23585	0.08111904	0.10560647	0.13106736	0.07714103	0.08584163	0.20286376	0.14192550	0.13854427	0.14187119	0.13523905	0.138551503333333	0.11040108	0.14121944	0.09135220	0.12816092	0.10415469	0.13801421	0.08530389
360	"1H-Indole-2,3-dione"	forward	146.0242953	211.8115	5.789589e-03	5.224327e-03	1.078909e-02	3.645721e-03	6.439086e-02	3.002298e-01	3.384689e-03	2.436143e-02	2.648834e-02	1.755489e-02	0.0228015533333333	8.652674e-05	2.314647e-03	9.158528e-05	9.183557e-05	1.021925e-04	1.394233e-03	1.003709e-02
361	"[4]-Gingerdiol 3,5-diacetate"	forward	351.1846435	28.6174	0.03095174	0.01356144	0.01227512	0.01075247	0.03871333	0.02013705	0.02334060	0.02326441	0.01974437	0.01908895	0.0206992433333333	0.03126579	0.05581860	0.02711944	0.02681802	0.05918556	2.79547541	0.02779508
362	"5,7-dihydroxy-2-(4-hydroxyphenyl)-6,8-dimethyl-3,4-dihydro-2H-1-benzopyran-4-one"	forward	299.0935822	190.879	0.3497122	0.3395324	0.6302668	0.3002945	0.2518759	0.1872190	0.3789615	0.5215717	0.4048689	0.3775147	0.434651766666667	0.9903377	0.4852621	0.4291686	0.6436248	1.1428147	0.3923537	0.5330939
363	trans-Ferulic acid	forward	193.0503929	316.476	0.021368250	0.016529394	0.017077973	0.019713973	0.009227388	0.001115160	0.012574003	0.027536530	0.022066947	0.021599989	0.0237344886666667	0.028529726	0.039342003	0.019762254	0.028056762	0.038127341	0.030190694	0.014406214
364	Phenylacetylglutamine	forward	263.1060936	210.842	0.030214046	0.007349732	0.023022975	0.027775533	0.011002482	0.016438967	0.010541491	0.010029173	0.011498442	0.011046806	0.0108581403333333	0.005526278	0.021387090	0.011001058	0.008108378	0.009636025	0.009269166	0.003875207
365	"2,3,4,5-Tetrahydropiperidine-2-carboxylate"	forward	126.0556939	63.082	2.180228e-02	4.211212e-02	2.303828e-02	2.375379e-02	5.548715e-02	1.641992e-02	2.114894e-02	1.586303e-02	2.489885e-02	1.800951e-02	0.0195904633333333	8.652674e-05	9.420344e-03	6.858462e-03	1.519727e-02	1.083248e-02	1.666689e-02	2.972356e-03
366	Ochratoxin A	forward	402.0725178	294.934	3.194417e-03	4.282372e-03	6.615598e-03	7.836835e-03	1.326374e-02	1.635151e-02	6.880771e-03	1.420702e-03	1.072214e-02	9.040554e-03	0.007061132	1.359574e-02	2.742744e-04	1.257352e-03	6.847380e-03	4.695284e-02	9.156933e-05	1.026597e-02
367	LysoPA(16:0/0:0)	forward	409.2371025	272.883	0.015852644	0.018551034	0.015642815	0.013006241	0.010225835	0.012108095	0.010080457	0.006327826	0.006976722	0.007374318	0.00689295533333333	0.004167999	0.003541985	0.004100182	0.010304203	0.004350662	0.005752283	0.010032181
368	Glycitin	forward	445.1155315	186.497	0.007550081	0.008600330	0.007523784	0.008664631	0.008728588	0.009428584	0.004628685	0.005550952	0.005787869	0.005559372	0.005632731	0.001988814	0.004347721	0.003419898	0.003733845	0.004495052	0.004980322	0.002277191
369	Aspartame	forward	293.1144294	360.808	0.032757108	0.031909402	0.026075725	0.015326252	0.014489913	0.022244785	0.018882364	0.016651649	0.013166347	0.015001331	0.0149397756666667	0.007602420	0.009875633	0.009886067	0.007944735	0.006839541	0.013977056	0.006928266
370	"3,4-Dihydroxyhydrocinnamic acid"	forward	181.050629	116.837	0.11079913	0.04507792	0.18830035	0.24268716	0.02225734	0.14744839	0.15420708	0.40327695	0.12563290	0.06048165	0.196463833333333	0.24963402	0.39350735	0.20641762	0.45450386	0.37806788	0.37693072	0.51557731
371	Methylsuccinic acid	forward	131.0346643	155.058	0.8779642	1.1434422	0.8979506	0.6642152	0.8693650	0.9184847	0.8210918	0.7920286	0.8450374	0.8146855	0.8172505	0.6997272	0.4627108	0.5573929	0.2967860	0.8511866	0.5514562	0.5799838
372	11-Dehydro-thromboxane B2	forward	367.2134572	140.513	0.009141767	0.012700183	0.023355145	0.016564492	0.020894350	0.011275546	0.013412481	0.049877794	0.060526475	0.052702822	0.0543690303333333	0.077205039	0.060234654	0.122678767	0.088234293	0.065735023	0.062659634	0.037866044
373	Mesalazine	forward	152.0349438	263.798	0.02567221	0.01776463	0.03405774	0.01511622	0.01636805	0.01605940	0.01331989	0.02542349	0.02607785	0.02610001	0.0258671166666667	0.01619805	0.06212554	0.04218669	0.02927962	0.17104713	0.02866096	0.01715260
374	Rosmarinic acid	forward	359.0779197	201.067	0.068520715	0.077131010	0.080978310	0.106193844	0.116461413	0.041598373	0.076662237	0.067086569	0.074906040	0.066666767	0.0695531253333333	0.008389362	0.039960997	0.055681309	0.078863526	0.050150227	0.042110580	0.035371625
375	Catechin	forward	289.072206	323.3115	0.005962206	0.004113145	0.005605107	0.005658774	0.011632378	0.005520958	0.004923058	0.011954665	0.002379689	0.011303650	0.00854600133333333	0.006566876	0.010013027	0.011731909	0.007812650	0.017398446	0.006033414	0.008453296
376	(R)-3-Hydroxy-tetradecanoic acid	forward	243.1970381	60.1344	0.4362140	0.6515785	1.0486591	0.4468513	0.4486888	0.3014341	0.8977475	0.4622333	0.3510871	0.4733867	0.428902366666667	0.1451448	0.3231352	0.1431957	0.1369793	0.2506403	0.4415097	0.1853356
377	Kaempferide	forward	299.0562976	30.6984	0.2431532	0.3084379	0.5917360	0.3288870	0.3597723	0.1334850	0.1544439	0.2973428	0.2809928	0.2673474	0.281894333333333	0.2073361	0.3081474	0.3581131	0.1614106	0.1538758	0.3403991	0.3889684
378	Dethiobiotin	forward	213.1245252	279.82	0.035530664	0.068590695	0.029484498	0.019782370	0.032879653	0.058722341	0.030164599	0.023577902	0.029407906	0.025965750	0.026317186	0.018359688	0.015572572	0.017296462	0.009351117	0.016430485	0.031874599	0.013397452
379	Glutamylglutamic acid	forward	275.0891474	465.224	0.024120725	0.060728104	0.019124331	0.015693145	0.030998776	0.021114525	0.021998551	0.024177595	0.024456156	0.022659862	0.0237645376666667	0.033422414	0.007512305	0.014339480	0.010037302	0.015122117	0.019395403	0.010293298
380	Oxoglutaric acid	forward	145.0140404	55.6819	0.035372557	0.039479769	0.050323634	0.030221114	0.063586375	0.011544926	0.007398978	0.052012049	0.062172129	0.059029938	0.0577380386666667	0.076889180	0.013115013	0.066170931	0.112815769	0.045413697	0.066318502	0.063558373
381	"2-(3,4-dihydroxyphenyl)-3,4-dihydro-2H-1-benzopyran-3,5,7-triol"	forward	289.0723798	50.1753	0.17069009	0.14718241	0.10777672	0.16254971	0.11564509	0.11533633	0.14042387	0.16272904	0.19035848	0.18556996	0.179552493333333	0.21254364	0.19551737	0.30146301	0.26860156	0.16144981	0.14145265	0.07974003
382	Bovinic acid	forward	279.2332361	218.737	0.0076730240	0.0172357506	0.0154438309	0.0124257820	0.0081494921	0.0110107973	0.0065975057	0.0077763399	0.0042122350	0.0090265296	0.00700503483333333	0.0006119812	0.0016002789	0.0054206922	0.0035047146	0.0044238786	0.0015537517	0.0029582589
383	Levoglucosan	forward	161.0453877	211.261	0.008036925	0.024391902	0.021583689	0.013957236	0.024637256	0.027014462	0.017472444	0.025600608	0.031563547	0.026008232	0.027724129	0.025832548	0.024757953	0.028306394	0.042759730	0.032753503	0.025391238	0.021775057
384	"2',4',6'-Trihydroxyacetophenone"	forward	167.0347613	64.6382	0.4103471	0.2219795	0.2353631	0.2827420	0.2865758	0.2003014	0.2000822	0.3687930	0.3997475	0.3765763	0.3817056	0.4497187	0.4653037	0.5193047	0.4738882	0.4469889	0.4979042	0.3781227
385	Estriol	forward	287.1662026	62.53245	0.04198065	0.03555904	0.03989235	0.08102488	0.05986065	0.02764887	0.06070350	0.03673980	0.03467128	0.04348171	0.0382975966666667	0.02059290	0.02682832	0.02842930	0.03204055	0.03586132	0.01931133	0.02444553
386	S-Nitrosoglutathione	forward	335.0693608	190.93	0.08228857	0.07568148	0.07158041	0.09780559	0.06136522	0.04813079	0.09124314	0.10168858	0.18093353	0.17571274	0.152778283333333	0.15369435	0.12392276	0.09825877	0.06278495	0.17224968	0.04302851	0.09706974
387	Sinapic acid	forward	223.0611599	53.5388	0.2120091	0.1470197	0.1539820	0.1770661	0.1724329	0.1516835	0.1997564	0.3024383	0.3865306	0.2872295	0.325399466666667	0.6133431	0.3400531	0.3115775	0.0822192	0.3809224	0.3349432	0.2447737
388	Heptadecanoic acid	forward	269.2488531	40.60175	3.064528	8.635126	7.204746	4.243629	3.843366	3.928148	3.392104	4.428567	4.234866	4.207159	4.29019733333333	4.599896	3.905803	4.830153	5.153913	5.005192	14.242506	4.871049
389	Curcumin	forward	367.1190501	105.566	1.758431e-02	6.446221e-02	1.071654e-02	3.129613e-02	7.269634e-03	6.592551e-02	5.446285e-02	6.227051e-02	4.721370e-02	4.337238e-02	0.0509521966666667	3.384094e-02	6.167296e-02	4.248053e-02	9.183557e-05	7.125162e-02	3.016082e-02	9.230865e-02
390	Syringic acid	forward	197.0454783	27.6757	0.19413424	0.14607980	0.03259685	0.14211381	0.25017203	0.19273421	0.12119175	0.34872734	0.38672127	0.33733553	0.357594713333333	0.54933870	0.76195762	0.51237153	0.57011836	0.63662254	0.55043791	0.42722637
391	(-)-Epigallocatechin	forward	305.0674179	46.82525	0.05787616	0.05129432	0.04920256	0.01201254	0.05868832	0.06380441	0.07006096	0.14934337	0.30156161	0.14527497	0.19872665	0.17737171	0.26237246	0.17681414	0.23261224	0.18054709	0.18010531	0.11483391
392	Hydroxyphenyllactic acid	forward	181.0505797	225.5055	0.1653066	0.1547448	0.1735101	0.1685513	0.1811746	0.1028221	0.1954341	0.1966155	0.2032704	0.1819483	0.193944733333333	0.1358785	0.2042853	0.1879275	0.2373671	0.1972114	0.1984282	0.1112605
393	Marmesin	forward	245.0821565	56.0019	0.20443419	0.24296236	0.18389200	0.30964095	0.15185747	0.13381713	0.22881839	0.17790391	0.16233355	0.17370389	0.171313783333333	0.11694641	0.15238576	0.09704879	0.10220653	0.19595400	0.10927653	0.09079564
394	Indole-3-carbinol	forward	146.0608033	239.888	0.0059228970	0.0001103389	0.0033932931	0.0069824102	0.0267512763	0.0714290680	0.0025162651	0.0125700235	0.0135540188	0.0119381098	0.0126873840333333	0.0071165070	0.0123185674	0.0063011945	0.0103485120	0.0062954704	0.0096985711	0.0032305102
395	Vicenin 2	forward	593.1527625	329.746	4.319402e-04	3.519311e-03	3.261034e-03	2.466562e-03	1.936457e-03	6.739771e-04	1.073320e-03	1.012606e-04	1.066645e-03	7.578019e-04	0.0006419025	8.652674e-05	1.056154e-04	9.158528e-05	9.231219e-04	1.021925e-04	9.156933e-05	7.629124e-05
396	Ginkgolide B	forward	423.1304418	202.5445	0.002222771	0.004409749	0.002720377	0.003623254	0.004582143	0.003091616	0.003327382	0.005798626	0.005931851	0.006865790	0.00619875566666667	0.002480815	0.006350702	0.008388509	0.010626441	0.008997241	0.009505413	0.006028821
397	"(2R,3S)-Piscidic acid"	forward	255.0511689	30.0447	0.08202085	0.01872602	0.04318561	0.08358099	0.08903640	0.04142882	0.08403182	0.20661943	0.17927918	0.21056669	0.198821766666667	0.25598483	0.35895400	0.32639147	0.36355657	0.29753384	0.21775705	0.15707903
398	Eupatilin	forward	343.0834621	78.9821	7.250888e-03	7.302722e-03	1.033121e-04	9.802105e-03	1.704770e-02	1.843645e-03	8.542403e-05	1.674399e-02	2.646938e-02	2.963864e-02	0.0242840033333333	7.037286e-02	3.125160e-02	4.008536e-02	4.090814e-02	2.602101e-02	1.961174e-02	2.343430e-02
399	18-carboxy dinor Leukotriene B4	forward	337.1667917	218.871	0.008394779	0.005291621	0.008234909	0.009958649	0.014369888	0.005963237	0.008560997	0.017054562	0.031401666	0.020802621	0.023086283	0.008562376	0.026789809	0.043441141	0.023656450	0.020338941	0.022976783	0.015852926
400	3-Butyl-1(3H)-isobenzofuranone	forward	409.2236643	147.8975	0.001218461	0.001989440	0.001126774	0.001252309	0.005563627	0.007849682	0.000807913	0.012214055	0.009996744	0.006052201	0.009421	0.018977186	0.012927649	0.017134705	0.015077858	0.009859299	0.002072849	0.011657689
401	Beta-D-Galactose	forward	179.0558365	319.7375	0.61083035	0.15165708	0.20797641	0.09130346	0.44259900	0.70808931	0.17435993	0.17447431	0.43852313	0.04911053	0.220702656666667	0.22648842	0.19917259	0.24247153	0.06384135	0.12483813	0.10669391	0.30616751
402	Myristoleic acid	forward	225.1863855	48.6287	0.13227108	0.26288036	0.07106464	0.04811862	0.27364675	0.08593572	0.15514715	0.11758226	0.12283309	0.09204948	0.11082161	0.05069714	0.03722297	0.02461694	0.03647685	0.03769979	0.01439071	0.03128479
403	O-Desmethylnaproxen	forward	215.0712403	187.777	1.708019	5.184347	3.419414	6.121195	3.853187	3.377564	6.164319	6.171203	6.581823	6.120349	6.291125	7.149400	9.399883	6.160766	7.111059	8.774704	6.144960	5.569199
404	Xanthoxylin	forward	195.0662613	207.0005	0.01324223	0.05480861	0.04045161	0.05626358	0.04457162	0.02476630	0.03989800	0.06640178	0.08007870	0.06316357	0.06988135	0.10577205	0.06078948	0.07127527	0.11356946	0.10704914	0.09225448	0.04816413
405	Estrone glucuronide	forward	445.1875955	23.6142	0.023720776	0.039045780	0.025999236	0.019276022	0.023912835	0.006294990	0.016265133	0.020716138	0.016799333	0.012628207	0.0167145593333333	0.006327075	0.006010328	0.006222388	0.005806658	0.002431784	0.006257056	0.004384913
406	3-Hydroxymethylglutaric acid	forward	161.0454962	404.221	0.18266945	0.08427842	0.10181768	0.11009288	0.14873393	0.22586192	0.09111608	0.14993704	0.15629482	0.15251706	0.152916306666667	0.13472276	0.12370597	0.17143656	0.18024670	0.17734396	0.21160792	0.08396215
407	Oxoadipic acid	forward	159.0295551	230.4075	0.01241349	0.02018038	0.01631599	0.02303806	0.02571704	0.02427759	0.02848556	0.02570779	0.02211374	0.03925134	0.02902429	0.02722440	0.04339115	0.03872452	0.03612793	0.01079782	0.04321742	0.02343162
408	m-Methylhippuric acid	forward	192.0664381	268.779	0.1048720733	0.0031269048	0.0128832385	0.0095430465	0.0051052871	0.0025123981	0.0036030652	0.0123300757	0.0114432023	0.0105210488	0.0114314422666667	0.0011895432	0.0031529201	0.0028541940	0.0018607305	0.0021821547	0.0021108791	0.0008431011
409	Ascorbic acid	forward	175.0247029	309.469	1.125784e-03	2.160360e-03	3.242935e-03	4.473572e-03	1.030738e-04	4.045907e-03	4.647437e-03	7.552523e-04	6.367471e-03	3.542196e-03	0.0035549731	7.868202e-03	1.056154e-04	9.158528e-05	1.541010e-03	1.021925e-04	9.156933e-05	1.551493e-02
410	Prolylhydroxyproline	forward	227.1015829	538.198	1.265527e-02	1.919928e-02	1.033121e-04	2.763265e-03	2.549483e-03	2.036133e-02	1.727558e-02	1.369754e-02	1.579660e-02	1.144419e-02	0.01364611	1.367494e-02	1.056154e-04	9.158528e-05	9.183557e-05	7.681456e-03	9.726435e-03	7.629124e-05
411	DL-Dopa	forward	196.0616223	320.1355	0.040667589	0.029084573	0.035619927	0.018829887	0.029944383	0.032076308	0.018734792	0.018550475	0.021626619	0.016451772	0.0188762886666667	0.011222023	0.019520317	0.013341679	0.018786741	0.015337649	0.013454551	0.008658394
412	Dexamethasone	forward	391.1883115	107.677	8.397174e-03	8.957036e-03	1.862587e-02	1.751207e-02	1.317296e-02	2.284055e-02	1.707092e-02	3.536274e-03	3.243577e-03	2.676394e-03	0.00315208166666667	3.039189e-03	2.618508e-03	1.919497e-03	9.183557e-05	3.454704e-03	1.026620e-02	8.999178e-04
413	"cis,cis-Muconic acid"	forward	141.0167358	106.869	0.32253665	0.96392290	0.59194949	0.33562181	0.59277945	0.32709193	0.34220534	0.67163497	0.39351518	0.30099220	0.455380783333333	0.27895499	0.23802402	0.18965360	0.26265928	0.27584441	0.03847341	0.26076422
414	"3,4-Methylenedioxybenzoic acid"	reverse	165.0191855	30.8321	0.13488351	0.12280195	0.12629848	0.14514626	0.13945083	0.10641495	0.15593946	1.60000851	0.08744503	0.09414460	0.593866046666667	0.20159414	0.33598426	0.26592666	0.40938856	0.29546322	0.25640218	0.16281215
415	5-Methoxysalicylic acid	reverse	167.0347354	31.40885	0.3371860	0.3234127	0.5852475	0.3122407	0.3290440	0.2785369	0.2813758	0.4772102	0.4613400	0.4475538	0.462034666666667	0.4572229	0.7542779	0.4963322	0.6728801	0.5952966	0.5531170	0.4188962
416	Dimethylmalonic acid	reverse	131.0347167	15.6236	0.004600739	0.004912145	0.004866465	0.004363747	0.004397664	0.004110528	0.004226852	0.002678019	0.005172170	0.004410263	0.00408681733333333	0.004487043	0.004981348	0.004972097	0.004635073	0.004241110	0.002679110	0.002396637
417	Myricetin	reverse	317.0305507	23.5918	0.0201136029	0.0231479624	0.0055441293	0.0272050962	0.0014663488	0.0120139982	0.0178026912	0.0739410528	0.0538419257	0.0484238598	0.0587356127666667	0.0904896255	0.1619567813	0.1145952376	0.1037889042	0.1263333214	0.0005111491	0.1338132667
418	Protocatechuic acid	reverse	153.0189475	24.8113	9.422106	3.544107	6.179509	7.602374	7.106351	16.484803	12.514539	11.609381	11.854206	11.233766	11.5657843333333	8.839217	17.480932	13.148121	13.686905	10.398714	8.761908	7.565478
419	1-Deoxy-D-xylulose 5-phosphate	reverse	213.0152466	5.45095	0.1450467	0.1842681	0.1608808	0.1556866	0.1694553	0.1518648	0.1375163	0.1615133	0.1584653	0.1561548	0.158711133333333	0.1175953	0.1578565	0.1612534	0.1170619	0.1571471	0.1548752	0.1004900
420	"[6]-Gingerdiol 3,5-diacetate"	reverse	379.2166153	28.3658	0.18952453	0.05123268	0.17562329	0.04603554	0.04869008	0.28021366	0.11831822	0.08798841	0.09420922	0.17640092	0.11953285	0.04363517	0.14156642	0.06050753	0.04682675	0.06142803	0.02542849	0.03363183
421	Orotic acid	reverse	157.0139169	44.1547	0.4423584	0.4045669	0.3649316	0.3855177	0.2890972	0.2481862	0.3861947	0.7041204	0.7085378	0.6685418	0.693733333333333	0.4675643	0.8927611	0.9795276	1.0157932	0.8428474	0.7901152	0.4514828
422	5Z-Dodecenoic acid	forward	197.1546624	219.369	0.007952800	0.006804050	0.009261543	0.004013506	0.016755857	0.003726924	0.013350977	0.044755335	0.036170740	0.040752442	0.0405595056666667	0.040379912	0.044074180	0.078165678	0.131462837	0.041483412	0.058153412	0.024829442
423	3-Hydroxybenzyl alcohol	forward	123.0445896	38.2222	0.05785504	0.02570552	0.02703896	0.05048341	0.04747044	0.06232254	0.03967419	0.10367065	0.10410039	0.10787438	0.10521514	0.18917279	0.19806758	0.11351016	0.07583127	0.18996596	0.13989913	0.16953515
424	Guanine	forward	150.04195	246.905	0.18878613	0.21939458	0.11200263	0.08760916	0.28938402	0.09744807	0.40373244	0.17761438	0.17164874	0.17617827	0.17514713	0.17015184	0.16672283	0.05782507	0.09261111	0.16871237	0.03362978	0.09275465
425	N2-gamma-Glutamylglutamine	forward	274.1046636	429.2145	0.028446637	0.045585929	0.024978167	0.016875108	0.034042862	0.024667386	0.024021867	0.023328281	0.021231619	0.019698132	0.021419344	0.012628280	0.009339111	0.013712689	0.007871666	0.010330605	0.016466383	0.007048354
426	gamma-Glutamylleucine	forward	259.1302383	370.44	0.06498816	0.18061191	0.11014529	0.03864841	0.15393860	0.10158112	0.07650569	0.04477715	0.04511948	0.04403058	0.0446424033333333	0.01079391	0.01626305	0.02671819	0.03901970	0.03760333	0.03679542	0.01895474
427	trans-Piceid	forward	403.1413497	143.332	0.019034975	0.016198603	0.015180774	0.023486690	0.025166409	0.008508191	0.017787378	0.013352902	0.011224389	0.009020615	0.011199302	0.007317385	0.011489653	0.017437962	0.021633104	0.005939300	0.013112255	0.011944215
428	Carbadox	forward	261.0617968	460.661	0.0025530976	0.0038521009	0.0018784416	0.0007817857	0.0033263500	0.0016505404	0.0030109410	0.0072211709	0.0081139041	0.0067785258	0.00737120026666667	0.0112487088	0.0069344217	0.0133047331	0.0115022565	0.0131053179	0.0098166054	0.0042117234
429	4-Nitrocatechol	forward	154.0142331	48.24545	0.3899569	0.2314410	0.6202209	0.3252158	0.4529315	0.2583839	0.2647597	0.6631864	0.5942236	0.6344125	0.6306075	0.8213634	0.9559541	0.9534579	1.0301957	0.8644652	0.8204844	0.4243742
430	Gibberellin A44	forward	345.1687472	138.6935	1.900561e-02	1.822693e-02	1.033121e-04	9.408097e-05	1.904106e-02	2.710787e-02	1.328863e-02	5.402940e-02	6.110401e-02	2.440725e-02	0.0465135533333333	5.269780e-02	3.678799e-02	3.279096e-02	1.249165e-01	2.095736e-02	3.632333e-02	2.770264e-02
431	Mercaptopurine	forward	151.0065939	73.7215	0.10701548	0.09648454	0.09982662	0.09243977	0.14083182	0.05750277	0.09408789	0.12605993	0.12943742	0.11983641	0.125111253333333	0.09600751	0.11510400	0.14005812	0.12965139	0.15716487	0.14125567	0.09000449
432	3-Hydroxypicolinic acid	forward	138.0191931	52.0945	0.02815402	0.19400835	0.03123956	0.01877637	0.23646552	0.03061809	0.02601414	0.06486616	0.05842723	0.05783648	0.0603766233333333	0.08006574	0.12789030	0.08368100	0.10781880	0.11277731	0.09137179	0.06195012
433	3-Methyladipic acid	forward	159.0660351	215.2405	0.01923497	0.01943826	0.02312039	0.02307605	0.01639128	0.01947708	0.03480489	0.04856100	0.03575088	0.03294632	0.0390860666666667	0.03388388	0.06333566	0.05991132	0.07155501	0.06364747	0.06045043	0.02636080
434	N-Formyl-L-aspartate	forward	160.0250847	412.0075	0.016646028	0.022606328	0.011586463	0.009549574	0.020407537	0.016647640	0.012134997	0.016012196	0.017093780	0.016032663	0.0163795463333333	0.013311846	0.007039942	0.011665557	0.011967746	0.013995134	0.012316326	0.008122672
435	1-Aminocyclopropanecarboxylic acid	forward	100.0399138	337.156	0.016414786	0.007117057	0.007813394	0.007471016	0.005508182	0.022133355	0.011041703	0.009374000	0.010462351	0.009464377	0.00976690933333333	0.004341229	0.007792329	0.002133495	0.002600128	0.003947167	0.004155280	0.002991017
436	beta-D-Glucosamine	forward	214.0487101	410.456	0.21120495	0.37840692	0.33561927	0.20778377	0.45665787	0.13787467	0.19327459	0.11803390	0.12085706	0.11299722	0.11729606	0.02031720	0.02104972	0.07436018	0.07551415	0.03596339	0.03837134	0.02456111
437	4-Ipomeanol	forward	167.0712534	51.38945	0.0972616144	0.0001103389	0.0808052485	0.0322930311	0.0238784829	0.1168505361	0.1013884920	0.1977912480	0.2115901484	0.2113545981	0.206911998166667	0.2196583086	0.3199271311	0.2841832923	0.1952398609	0.2152100426	0.2356698182	0.1855534387
438	p-Cresol sulfate	forward	187.0070369	24.56105	0.53451635	0.41334953	0.26725493	0.30843773	0.42837854	0.27956055	0.50189372	0.31192915	0.34028001	0.31380949	0.322006216666667	0.05251681	0.13815492	0.22881152	0.08687390	0.21228989	0.11168119	0.09318616
439	9-Decenoic acid	forward	169.1233636	51.5836	0.17236964	0.07579887	0.12673283	0.09071530	0.24251944	0.10370322	0.10336945	0.10605091	0.12126752	0.14608935	0.12446926	0.03371440	0.04189039	0.03640810	0.01235423	0.19823493	0.09178180	0.04951730
440	Gibberellin A3	forward	345.1348312	57.3585	0.12129136	0.21187516	0.18056689	0.14698055	0.15507765	0.07540202	0.14960758	0.06172925	0.08594612	0.10075093	0.0828087666666667	0.04526678	0.19733954	0.05466570	0.04595109	0.06143351	0.09436300	0.06234714
441	5-Hydroxyindoleacetic acid	forward	190.0510016	55.3051	0.08035701	0.02547808	0.02433745	0.02518679	0.07849197	0.02487748	0.02229427	0.11435212	0.05111539	0.01223547	0.0592343266666667	0.04871638	0.07816808	0.05209024	0.09599699	0.05512512	0.03193888	0.04373519
442	"2-Amino-3-methylimidazo[4,5-f]quinoline"	forward	197.082137	67.39165	0.09921442	0.06208113	0.11604582	0.10493084	0.13232860	0.13656669	0.09993639	0.17996217	0.16904335	0.11007867	0.153028063333333	0.11565659	0.18325668	0.12414182	0.14355880	0.17825326	0.10064216	0.07833584
